# Supplementary material for: Network Pharmacology-Based Prediction and Verification of the Targets and Mechanism for Panax Notoginseng Saponins against Coronary Heart Disease
Source: Evid Based Complement Alternat Med. 2019 Jul 3;2019:6503752. doi: 10.1155/2019/6503752 (PMC6636530; doi:10.1155/2019/6503752)
Supplement: Supplementary Materials — The supplementary materials contain 5 files which are the top 300 potential targets of each compound predicted from Pharmmapper Server. [file 6503752.f1.zip]

Archive with 6 entries (5 files):
- 6503752.f1/
- 6503752.f1/Ginsenoside Rb1.csv
- 6503752.f1/Ginsenoside Rd qt.csv
- 6503752.f1/Ginsenoside Re.csv
- 6503752.f1/Ginsenoside Rg1.csv
- 6503752.f1/Notoginsenoside R1.csv
