# Supplementary material for: Network Pharmacology-Based Prediction and Verification of the Targets and Mechanism for Panax Notoginseng Saponins against Coronary Heart Disease
Source: Evid Based Complement Alternat Med. 2019 Jul 3;2019:6503752. doi: 10.1155/2019/6503752 (PMC6636530; doi:10.1155/2019/6503752)
Supplement: Supplementary Materials — The supplementary materials contain 5 files which are the top 300 potential targets of each compound predicted from Pharmmapper Server. [file 6503752.f1.zip › 6503752.f1/Ginsenoside Rb1.csv]

Ligand: MOL007476
Pharma Model	Num Feature	Fit	Norm Fit	Num Hydrophobic	Num HB Acceptor	Num HB Donor	Num Positive	Num Negative	Num Aromatic	Name	Class	Uniplot	Function	Disease	Idication
4hg6_A_cavity_6	4	3.901	0.9753	4	0	0	0	0	0	NONE	NONE	NONE	NONE	NONE	NONE
2opx_A_cavity_3	4	3.855	0.9636	4	0	0	0	0	0	Lactaldehyde dehydrogenase	NONE	P25553	NONE	NONE	NONE
1rf8_A_cavity_3	4	3.794	0.9484	4	0	0	0	0	0	Eukaryotic translation initiation factor 4E	NONE	P07260	Involved in RNA binding	NONE	NONE
2gp6_B_cavity_1	5	3.994	0.7988	5	0	0	0	0	0	3-oxoacyl-[acyl-carrier-protein] synthase 2	NONE	P63456	NONE	NONE	NONE
1xjv_A_cavity_3	5	3.981	0.7961	3	1	0	0	1	0	Protection of telomeres protein 1	NONE	Q9NUX5	NONE	NONE	NONE
1xes_A_cavity_1	5	3.937	0.7874	5	0	0	0	0	0	Dihydropinosylvin synthase	NONE	Q02323	NONE	NONE	NONE
1qcb_F_cavity_1	6	4.721	0.7869	5	1	0	0	0	0	Heat-labile enterotoxin IIB, B chain	NONE	P43529	NONE	NONE	NONE
1vrn_C_cavity_3	5	3.929	0.7858	5	0	0	0	0	0	Photosynthetic reaction center cytochrome c subunit	NONE	P07173	NONE	NONE	NONE
1r8u_A_cavity_1	5	3.926	0.7852	5	0	0	0	0	0	Cbp/p300-interacting transactivator 2	TRANSCRIPTION/TRANSCRIPTION ACTIVATOR	CITE2_HUMAN	Interferes with the binding of transcription factors HIF-1a and STAT2 to p300/CBP.	NONE	NONE
2hmn_A_cavity_2	5	3.922	0.7843	3	0	1	0	1	0	Naphthalene 1,2-dioxygenase subunit alpha	NONE	P0A111	NONE	NONE	NONE
1u08_A_cavity_3	5	3.891	0.7782	3	0	1	1	0	0	Aminotransferase ybdL	NONE	P77806	NONE	NONE	NONE
1win_A_cavity_1	5	3.869	0.7737	3	1	0	1	0	0	Flotillin-2	NONE	Q60634	NONE	NONE	NONE
2dgu_A_cavity_2	5	3.861	0.7722	3	1	0	0	1	0	Heterogeneous nuclear ribonucleoprotein Q	NONE	O60506	NONE	NONE	NONE
2c0p_A_cavity_2	5	3.855	0.771	3	1	0	1	0	0	Acetylcholinesterase	NONE	P21836	Lipid transport and metabolism	NONE	NONE
2ayn_C_cavity_2	5	3.855	0.771	3	1	0	1	0	0	Ubiquitin carboxyl-terminal hydrolase 14	HYDROLASE	UBP14_HUMAN	NONE	NONE	NONE
1b0a_A_cavity_2	5	3.827	0.7654	5	0	0	0	0	0	Bifunctional protein folD	NONE	P24186	NONE	NONE	NONE
1qox_N_cavity_2	5	3.816	0.7631	3	1	0	1	0	0	Beta-glucosidase	NONE	Q03506	NONE	NONE	NONE
1ukf_A_cavity_1	6	4.485	0.7475	4	1	0	0	1	0	Cysteine protease avirulence protein avrPphB	NONE	Q52430	NONE	NONE	NONE
1fiz_A_cavity_4	6	4.463	0.7439	3	2	0	1	0	0	Acrosin	NONE	P08001	NONE	NONE	NONE
1ml8_A_cavity_1	6	4.399	0.7332	6	0	0	0	0	0	Protein yhfA	NONE	P0ADX3	NONE	NONE	NONE
3epy_B_cavity_2	6	4.235	0.7059	6	0	0	0	0	0	Acyl-CoA-binding domain-containing protein 7	NONE	Q8N6N7	NONE	NONE	NONE
1dus_A_cavity_2	6	4.197	0.6995	3	2	0	0	1	0	Protein MJ0882	NONE	Q58292	NONE	NONE	NONE
2hyd_A_cavity_2	6	4.154	0.6923	6	0	0	0	0	0	Putative multidrug export ATP-binding/permease protein SAV1866	NONE	Q99T13	NONE	NONE	NONE
2c62_A_cavity_1	7	4.798	0.6854	5	1	0	1	0	0	Activated RNA polymerase II transcriptional coactivator p15	NONE	P53999	NONE	NONE	NONE
2bj3_A_cavity_1	6	4.088	0.6813	6	0	0	0	0	0	Putative nickel-responsive regulator	NONE	O58316	Involved in DNA binding	NONE	NONE
1wjt_A_cavity_1	6	4.066	0.6777	6	0	0	0	0	0	Transcription elongation factor A protein 3	NONE	P23881	NONE	NONE	NONE
1c3c_B_cavity_3	6	4.064	0.6774	2	1	2	0	1	0	Adenylosuccinate lyase	NONE	Q9X0I0	NONE	NONE	NONE
1w98_B_cavity_1	6	4.057	0.6762	3	1	1	1	0	0	G1/S-specific cyclin-E1	TRANSFERASE	CCNE1_HUMAN	Essential for the control of the cell cycle at the G1/S (start) transition.	NONE	NONE
1njf_D_cavity_1	6	4.04	0.6734	3	2	0	1	0	0	DNA polymerase III subunit tau	NONE	P06710	Involved in nucleotide binding	NONE	NONE
1iol_A_cavity_2	6	4.026	0.671	3	1	1	1	0	0	Estradiol 17-beta-dehydrogenase 1	NONE	P14061	Lipid transport and metabolism	NONE	Some evidence suggests that NADH might be useful in treating Parkinsons disease, chronic fatigue syndrome, Alzheimers disease and cardiovascular disease.
1vbg_A_cavity_4	6	4.026	0.6709	3	1	1	0	1	0	Pyruvate, phosphate dikinase 1, chloroplastic	NONE	P11155	Carbohydrate transport and metabolism	NONE	NONE
2hka_C_cavity_1	6	4.015	0.6691	6	0	0	0	0	0	Epididymal secretory protein E1	NONE	P79345	NONE	NONE	NONE
1s40_A_cavity_2	6	4.014	0.669	4	1	0	0	1	0	Cell division control protein 13	NONE	P32797	NONE	NONE	NONE
1x65_A_cavity_1	6	4.006	0.6677	4	1	0	0	1	0	Cold shock domain-containing protein E1	NONE	O75534	NONE	NONE	NONE
1dos_A_cavity_1	6	4	0.6667	4	1	0	1	0	0	Fructose-bisphosphate aldolase class 2	NONE	P0AB71	Carbohydrate transport and metabolism	NONE	NONE
2xat_A_cavity_2	6	4	0.6667	4	0	1	1	0	0	Chloramphenicol acetyltransferase	NONE	P26841	Involved in acyltransferase activity	NONE	Used in treatment of cholera, as it destroys the vibrios and decreases the diarrhea. It is effective against tetracycline-resistant vibrios. It is also used in eye drops or ointment to treat bacterial conjunctivitis.
1k44_E_cavity_1	6	4	0.6667	4	1	0	0	1	0	Nucleoside diphosphate kinase	NONE	P84284	NONE	NONE	NONE
2zuy_A_cavity_4	6	3.998	0.6663	3	1	1	1	0	0	Rhamnogalacturonan lyase yesX	NONE	O31527	NONE	NONE	NONE
2pgh_B_cavity_1	8	5.328	0.6661	6	0	1	0	1	0	Hemoglobin subunit alpha	NONE	P01965	NONE	NONE	NONE
2bc9_A_cavity_1	6	3.997	0.6661	3	1	1	1	0	0	Interferon-induced guanylate-binding protein 1	NONE	P32455	NONE	NONE	NONE
2ex8_A_cavity_3	6	3.996	0.6661	3	2	0	0	1	0	D-alanyl-D-alanine carboxypeptidase dacB	NONE	P24228	NONE	NONE	NONE
1oyz_A_cavity_2	6	3.993	0.6654	2	2	1	1	0	0	Protein yibA	NONE	P0ADK7	NONE	NONE	NONE
2apo_A_cavity_1	6	3.965	0.6609	4	1	0	0	1	0	Probable tRNA pseudouridine synthase B	NONE	Q57612	NONE	NONE	NONE
2w7n_B_cavity_1	7	4.617	0.6596	4	0	2	0	1	0	TrfB transcriptional repressor protein	NONE	P03052	NONE	NONE	NONE
2vdg_A_cavity_1	7	4.617	0.6596	4	2	0	0	1	0	Aldose reductase	NONE	P23901	NONE	NONE	NONE
1t90_D_cavity_1	6	3.942	0.657	3	1	0	0	2	0	Methylmalonate semialdehyde dehydrogenase [acylating]	NONE	P42412	NONE	NONE	NONE
2ran_A_cavity_4	6	3.933	0.6554	2	1	1	1	1	0	Annexin A5	NONE	P14668	Involved in calcium ion binding	NONE	NONE
3epm_B_cavity_2	6	3.924	0.654	4	1	0	1	0	0	Thiamine biosynthesis protein thiC	NONE	Q9A6Q5	NONE	NONE	NONE
3c7g_A_cavity_3	6	3.922	0.6536	4	1	0	1	0	0	Arabinoxylan arabinofuranohydrolase	NONE	Q45071	NONE	NONE	NONE
2in5_A_cavity_2	6	3.909	0.6515	2	0	2	0	2	0	Uncharacterized lipoprotein gfcB	NONE	P75884	NONE	NONE	NONE
2daf_A_cavity_2	7	4.553	0.6505	5	1	0	0	1	0	IQ and ubiquitin-like domain-containing protein	NONE	Q8NA54	NONE	NONE	NONE
2cb2_D_cavity_5	6	3.889	0.6481	4	0	1	0	1	0	Sulfur oxygenase/reductase	NONE	P29082	NONE	NONE	NONE
1rp1_A_cavity_2	6	3.883	0.6471	4	0	1	1	0	0	Pancreatic lipase-related protein 1	NONE	P06857	NONE	NONE	NONE
2nqb_G_cavity_1	6	3.883	0.6471	6	0	0	0	0	0	Histone H3	NONE	P02299	NONE	NONE	NONE
1tg6_A_cavity_2	6	3.88	0.6466	4	1	0	0	1	0	Putative ATP-dependent Clp protease proteolytic subunit, mitochondrial	HYDROLASE	CLPP_HUMAN	Clp cleaves peptides in various proteins in a process that requires ATP hydrolysis. Clp may be responsible for a fairly general and central housekeeping function rather than for the degradation of specific substrates.	NONE	NONE
3bdf_B_cavity_1	6	3.879	0.6465	2	1	1	0	2	0	Alkaline phosphatase	NONE	P00634	Inorganic ion transport and metabolism	NONE	NONE
1u80_A_cavity_2	6	3.876	0.6461	2	1	1	2	0	0	Coenzyme A biosynthesis bifunctional protein coaBC	NONE	P0ABQ0	Catalyzes two steps in the biosynthesis of coenzyme A. In the first step cysteine is conjugated to 4'-phosphopantothenate to form 4-phosphopantothenoylcysteine (PubMed:11278255). In the second the latter compound is decarboxylated to form 4'-phosphopantotheine (PubMed:10922366).	NONE	NONE
1in7_A_cavity_2	6	3.873	0.6454	2	3	0	0	1	0	Holliday junction ATP-dependent DNA helicase ruvB	NONE	Q56313	Involved in nucleotide binding	NONE	NONE
3bg0_G_cavity_1	6	3.871	0.6452	2	1	2	1	0	0	Protein SEC13 homolog	NONE	P55735	NONE	NONE	NONE
1emy_A_cavity_1	10	6.447	0.6447	6	1	1	0	2	0	Myoglobin	NONE	P02186	NONE	NONE	NONE
2r7x_B_cavity_6	6	3.862	0.6437	2	3	1	0	0	0	RNA-directed RNA polymerase	NONE	O37061	NONE	NONE	NONE
2k78_A_cavity_1	6	3.852	0.6419	5	0	1	0	0	0	Iron-regulated surface determinant protein C	NONE	Q7A151	NONE	NONE	NONE
1ya0_B_cavity_2	7	4.49	0.6415	5	1	1	0	0	0	Protein SMG7	NONE	Q92540	NONE	NONE	NONE
3bkb_A_cavity_3	6	3.846	0.641	3	2	0	0	1	0	Proto-oncogene tyrosine-protein kinase Fes/Fps	TRANSFERASE	FES_HUMAN	NONE	NONE	NONE
1rso_A_cavity_1	6	3.84	0.64	5	1	0	0	0	0	Disks large homolog 1	NONE	Q62696	NONE	NONE	NONE
1hty_A_cavity_8	6	3.839	0.6399	4	0	1	1	0	0	Alpha-mannosidase 2	NONE	Q24451	Carbohydrate transport and metabolism	NONE	NONE
2d8h_A_cavity_1	6	3.837	0.6395	2	1	1	1	1	0	SH3 domain-containing YSC84-like protein 1	NONE	Q96HL8	NONE	NONE	NONE
1yhn_B_cavity_1	6	3.824	0.6374	6	0	0	0	0	0	Ras-related protein Rab-7a	NONE	P51149	NONE	NONE	NONE
1wh0_A_cavity_1	6	3.824	0.6373	4	0	1	0	1	0	Ubiquitin carboxyl-terminal hydrolase 19	HYDROLASE	UBP19_HUMAN	Involved in the ubiquitin-dependent proteolytic pathway in conjunction with the 26S proteasome (By similarity).	NONE	NONE
1tez_B_cavity_2	6	3.82	0.6366	4	1	1	0	0	0	Deoxyribodipyrimidine photo-lyase	NONE	P05327	Involved in DNA photolyase activity	NONE	NONE
2egw_B_cavity_1	6	3.813	0.6355	3	2	0	0	1	0	Ribosomal RNA small subunit methyltransferase E	NONE	O66552	NONE	NONE	NONE
1gk9_B_cavity_7	7	4.446	0.6351	4	1	1	0	1	0	Penicillin G acylase	NONE	P06875	NONE	NONE	NONE
1c8v_A_cavity_3	6	3.809	0.6348	4	0	1	1	0	0	Tryptophan synthase alpha chain	NONE	P00929	NONE	NONE	NONE
1e5q_D_cavity_4	6	3.807	0.6345	3	1	1	1	0	0	Saccharopine dehydrogenase [NADP+, L-glutamate-forming]	NONE	Q9P4R4	Amino acid transport and metabolism	NONE	NONE
1to3_A_cavity_1	6	3.801	0.6335	3	2	0	1	0	0	Uncharacterized aldolase yihT	NONE	Q9L7R9	NONE	NONE	NONE
2gbp_A_cavity_2	6	3.8	0.6334	4	1	1	0	0	0	D-galactose-binding periplasmic protein precursor	NONE	P0AEE5	Carbohydrate transport and metabolism	NONE	NONE
1kvd_B_cavity_1	6	3.799	0.6332	5	1	0	0	0	0	Salt-mediated killer protoxin 1	NONE	P19972	NONE	NONE	NONE
2a7s_A_cavity_3	6	3.795	0.6326	6	0	0	0	0	0	Probable propionyl-CoA carboxylase beta chain 5	NONE	P96885	NONE	NONE	NONE
1y64_B_cavity_2	8	5.057	0.6322	6	1	0	0	1	0	Actin, alpha skeletal muscle	NONE	P68135	NONE	NONE	NONE
1x9f_I_cavity_1	9	5.644	0.6271	6	1	0	0	2	0	Extracellular globin-4	NONE	P13579	NONE	NONE	NONE
2bjh_B_cavity_2	7	4.381	0.6258	3	1	1	0	2	0	Feruloyl esterase A	NONE	O42807	NONE	NONE	NONE
2i3q_A_cavity_1	7	4.379	0.6256	3	1	1	0	2	0	DNA endonuclease I-CreI	NONE	P05725	NONE	NONE	NONE
2qc3_A_cavity_1	9	5.612	0.6236	4	2	1	0	2	0	Malonyl CoA-acyl carrier protein transacylase	NONE	P63458	NONE	NONE	NONE
2ysw_C_cavity_1	8	4.987	0.6234	4	2	0	1	1	0	3-dehydroquinate dehydratase	NONE	O66440	NONE	NONE	NONE
1yiv_A_cavity_1	8	4.987	0.6233	4	2	0	2	0	0	Myelin P2 protein	NONE	P0C6G6	NONE	NONE	NONE
2qtv_A_cavity_6	7	4.355	0.6221	3	1	1	0	2	0	Protein transport protein SEC23	NONE	P15303	NONE	NONE	NONE
1or7_C_cavity_1	7	4.344	0.6206	5	1	0	1	0	0	RNA polymerase sigma-E factor	NONE	P0AGB6	NONE	NONE	NONE
1wxr_A_cavity_2	8	4.96	0.62	4	1	1	2	0	0	Hemoglobin-binding protease hbp	NONE	O88093	NONE	NONE	NONE
3b68_A_cavity_1	7	4.335	0.6192	5	0	1	0	1	0	Androgen receptor	TRANSCRIPTION	ANDR_HUMAN	Steroid hormone receptors are ligand-activated transcription factors that regulate eukaryotic gene expression and affect cellular proliferation and differentiation in target tissues. Transcription factor activity is modulated by bound coactivator and core	Genetic variation in AR can be responsible of androgenetic alopecia (AGA) [MIM:109200].;Defects in AR are the cause of androgen insensibility syndrome (AIS) [MIM:300068]; previously known as testicular feminization syndrome (TFM). It can be complete (CAIS) when external genitalia are phenotypically female; or partial (PAIS) when external genitalia are substantively ambiguous or mild (MAIS) when e…	Hypoactive sexual desire disorder;Hepatitis B virus infection;Cardiac failure;Andrology;Hirsutism;Female sexual dysfunction;Psoriasis;Reperfusion injury;Plasmodium infection;Atherosclerosis;Prostate hyperplasia;Fatigue;Male sexual dysfunction;Autoimmune disease;Testosterone deficiency;Uterine fibroids;Metabolic disorder;Myalgia;Obesity;Gynecological disorder;Contraception;Cancer;Hypercholesterole…
1rym_A_cavity_1	8	4.953	0.6191	6	1	0	0	1	0	Chloroplastic group IIB intron splicing facilitator CRS2, chloroplastic	NONE	Q9M5P4	NONE	NONE	NONE
1uvx_A_cavity_1	7	4.333	0.619	5	1	0	0	1	0	Globin LI637	NONE	Q08753	Involved in oxygen binding	NONE	NONE
6req_D_cavity_1	7	4.264	0.6092	4	2	0	0	1	0	Methylmalonyl-CoA mutase large subunit	NONE	P11653	NONE	NONE	NONE
2lh5_A_cavity_1	8	4.87	0.6088	6	1	0	0	1	0	Leghemoglobin-2	NONE	P02240	Cell motility	NONE	NONE
2a98_A_cavity_2	8	4.858	0.6073	4	0	2	2	0	0	Inositol-trisphosphate 3-kinase C	NONE	Q96DU7	NONE	NONE	NONE
1rp8_A_cavity_1	8	4.837	0.6047	4	1	1	2	0	0	Alpha-amylase type A isozyme	NONE	P00693	Carbohydrate transport and metabolism	NONE	NONE
1yxe_A_cavity_3	8	4.835	0.6043	5	1	1	0	1	0	Apical membrane antigen 1	NONE	P22621	NONE	NONE	NONE
1m3s_A_cavity_1	7	4.215	0.6022	4	1	1	0	1	0	3-hexulose-6-phosphate isomerase	NONE	P42404	NONE	NONE	NONE
1r6u_A_cavity_4	7	4.214	0.602	4	1	1	0	1	0	Tryptophanyl-tRNA synthetase, cytoplasmic	NONE	P23381	Translation, ribosomal structure and biogenesis	NONE	Tryptophan may be useful in increasing serotonin production, promoting healthy sleep, managing depression by enhancing mental and emotional well-being, managing pain tolerance, and managing weight.
1u63_C_cavity_2	7	4.207	0.601	5	0	1	1	0	0	50S ribosomal protein L1P	NONE	P54050	Translation, ribosomal structure and biogenesis	NONE	NONE
2nr0_D_cavity_1	7	4.195	0.5993	4	2	0	1	0	0	tRNA pseudouridine synthase A	NONE	P07649	NONE	NONE	NONE
2bsk_D_cavity_1	8	4.775	0.5968	5	0	1	0	2	0	Mitochondrial import inner membrane translocase subunit Tim9	NONE	Q9Y5J7	NONE	NONE	NONE
2k8y_A_cavity_1	7	4.159	0.5941	6	1	0	0	0	0	Uncharacterized protein MJ0187	NONE	Q57646	NONE	NONE	NONE
2pnc_A_cavity_6	8	4.74	0.5925	4	1	1	1	1	0	Primary amine oxidase, liver isozyme	NONE	Q29437	Secondary metabolites biosynthesis, transport and catabolism	NONE	NONE
2hcb_B_cavity_2	7	4.143	0.5919	4	0	2	0	1	0	Chromosomal replication initiator protein dnaA	NONE	O66659	Involved in nucleotide binding	NONE	NONE
2vv5_F_cavity_2	7	4.14	0.5915	6	1	0	0	0	0	Small-conductance mechanosensitive channel	MEMBRANE PROTEIN	MSCS_ECOLI	Mechanosensitive channel that participates in the regulation of osmotic pressure changes within the cell, opening in response to stretch forces in the membrane lipid bilayer, without the need for other proteins. Forms an ion channel of 1.0 nanosiemens con;The channel pore is formed by TM3 and the loop between TM2 and TM3. After a sharp turn at Gly-113, an alpha-helix (residues 114-127) is oriente…	NONE	NONE
2csx_A_cavity_1	7	4.13	0.59	4	0	2	1	0	0	Methionyl-tRNA synthetase	NONE	O67298	NONE	NONE	NONE
1iau_A_cavity_1	7	4.13	0.5899	4	1	1	0	1	0	Granzyme B	HYDROLASE	GRAB_HUMAN	This enzyme is necessary for target cell lysis in cell- mediated immune responses. It cleaves after Asp. Seems to be linked to an activation cascade of caspases (aspartate-specific cysteine proteases) responsible for apoptosis execution. Cleaves caspase-3	NONE	Autoimmune disease;Cancer
1wgw_A_cavity_1	7	4.126	0.5895	6	1	0	0	0	0	Signal recognition particle 54 kDa protein	NONE	P14576	NONE	NONE	NONE
1uhv_A_cavity_2	8	4.71	0.5888	5	0	2	1	0	0	Beta-xylosidase	NONE	P36906	NONE	NONE	NONE
1v5b_C_cavity_1	7	4.107	0.5868	4	1	1	0	1	0	3-isopropylmalate dehydrogenase	NONE	P12010	NONE	NONE	NONE
3brp_A_cavity_2	7	4.103	0.5862	4	0	2	1	0	0	C-phycocyanin alpha chain	NONE	P00306	NONE	NONE	NONE
3cb5_A_cavity_4	7	4.097	0.5853	2	3	0	2	0	0	FACT complex subunit spt16	NONE	O94267	NONE	NONE	NONE
1a4e_A_cavity_2	7	4.089	0.5841	6	1	0	0	0	0	Peroxisomal catalase A	NONE	P15202	Involved in catalase activity	NONE	NONE
2da7_A_cavity_1	7	4.088	0.584	3	1	1	0	2	0	Zinc finger E-box-binding homeobox 2	NONE	O60315	NONE	NONE	NONE
2j47_A_cavity_1	7	4.088	0.584	3	1	1	0	2	0	O-GlcNAcase BT_4395	NONE	Q89ZI2	NONE	NONE	NONE
1ycd_A_cavity_2	7	4.087	0.5839	4	0	2	1	0	0	Family of serine hydrolases 1	NONE	P38777	NONE	NONE	NONE
2e74_A_cavity_3	7	4.085	0.5836	5	1	0	0	1	0	Cytochrome b6	NONE	P83791	Involved in oxidoreductase activity	NONE	NONE
1jcn_A_cavity_1	7	4.078	0.5826	4	1	1	1	0	0	Inosine-5-monophosphate dehydrogenase 1	OXIDOREDUCTASE	IMDH1_HUMAN	Rate limiting enzyme in the de novo synthesis of guanine nucleotides and therefore is involved in the regulation of cell growth. It may also have a role in the development of malignancy and the growth progression of some tumors.	Defects in IMPDH1 are the cause of retinitis pigmentosa type 10 (RP10) [MIM:180105]. RP leads to degeneration of retinal photoreceptor cells. Patients typically have night vision blindness and loss of midperipheral visual field. As their condition progresses, they lose their far peripheral visual field and eventually central vision as well. RP10 inheritance is autosomal dominant.	NONE
1f0n_A_cavity_1	9	5.241	0.5823	6	2	0	0	1	0	Antigen 85-B	NONE	P0C5B9	NONE	NONE	NONE
3frp_G_cavity_1	7	4.048	0.5783	4	1	1	1	0	0	Cobra venom factor	NONE	Q91132	NONE	NONE	NONE
2k0s_A_cavity_1	12	6.934	0.5778	7	3	2	0	0	0	ADP-ribosylation factor-like protein 2-binding protein	NONE	Q7SYL1	NONE	NONE	NONE
1kn9_B_cavity_1	8	4.613	0.5767	6	2	0	0	0	0	Signal peptidase I	NONE	P00803	Intracellular trafficking, secretion, and vesicular transport	NONE	NONE
2an7_A_cavity_1	7	4.033	0.5761	4	0	2	0	1	0	Protein parD	NONE	P22995	NONE	NONE	NONE
1s5a_A_cavity_1	7	4.032	0.576	3	1	1	2	0	0	Hypothetical protein yesE	NONE	O31511	NONE	NONE	NONE
2kd2_A_cavity_1	7	4.032	0.576	6	1	0	0	0	0	Fas apoptotic inhibitory molecule 1	NONE	Q9WUD8	NONE	NONE	NONE
1js6_B_cavity_2	7	4.031	0.5759	7	0	0	0	0	0	Aromatic-L-amino-acid decarboxylase	NONE	P80041	Catalyzes the decarboxylation of L-3,4-dihydroxyphenylalanine (DOPA) to dopamine, L-5-hydroxytryptophan to serotonin and L-tryptophan to tryptamine.	NONE	NONE
3czm_A_cavity_2	7	4.023	0.5747	4	1	1	0	1	0	L-lactate dehydrogenase	NONE	Q27797	Energy production and conversion	NONE	NONE
2ron_A_cavity_2	7	4.021	0.5744	4	1	1	0	1	0	Surfactin synthetase thioesterase subunit	NONE	Q08788	NONE	NONE	NONE
1wpx_B_cavity_1	7	4.01	0.5728	4	1	1	0	1	0	Carboxypeptidase Y	NONE	P00729	NONE	NONE	NONE
1aip_D_cavity_1	8	4.577	0.5721	4	2	1	1	0	0	Elongation factor Tu-A	NONE	P60338	NONE	NONE	NONE
2jbp_H_cavity_2	8	4.576	0.572	4	1	1	2	0	0	MAP kinase-activated protein kinase 2	NONE	P49137	Involved in protein kinase activity	NONE	NONE
2qxx_A_cavity_1	8	4.572	0.5715	6	2	0	0	0	0	Deoxycytidine triphosphate deaminase	NONE	O07247	NONE	NONE	NONE
2aa7_A_cavity_1	7	3.999	0.5712	5	2	0	0	0	0	Mineralocorticoid receptor	TRANSCRIPTION	MCR_HUMAN	Receptor for both mineralocorticoids (MC) such as aldosterone and glucocorticoids (GC) such as corticosterone or cortisol. Binds to mineralocorticoid response elements (MRE) and transactivates target genes. The effect of MC is to increase ion and water tr	Defects in NR3C2 are a cause of autosomal dominant pseudohypoaldosteronism type I (PHA1) [MIM:177735]. PHA1 is characterized by urinary salt wasting, resulting from target organ unresponsiveness to mineralocorticoids. There are 2 forms of PHA1: the autosomal dominant form that is mild, and the recessive form which is more severe and due to defects in any of the epithelial sodium channel subunits.…	Metabolic disorder;Hypertension;Cardiovascular disease;Urinary tract disease
1ix1_B_cavity_1	7	3.997	0.5709	3	1	1	1	1	0	Peptide deformylase	NONE	Q9I7A8	Translation, ribosomal structure and biogenesis	NONE	NONE
1drm_A_cavity_1	11	6.279	0.5708	6	2	1	1	1	0	Sensor protein fixL	NONE	P23222	Signal transduction mechanisms	NONE	NONE
1vap_A_cavity_1	8	4.565	0.5707	4	0	2	2	0	0	Phospholipase A2	NONE	P51972	NONE	NONE	NONE
2z2n_A_cavity_2	7	3.991	0.5701	4	1	1	0	1	0	Virginiamycin B lyase	NONE	P17978	NONE	NONE	NONE
1h29_D_cavity_3	9	5.127	0.5696	7	1	0	0	1	0	High-molecular-weight cytochrome c	NONE	P24092	Involved in iron ion binding	NONE	NONE
1a8p_A_cavity_1	7	3.987	0.5695	6	1	0	0	0	0	Ferredoxin--NADP reductase	NONE	Q44532	Involved in oxidoreductase activity	NONE	NONE
1p16_B_cavity_4	7	3.986	0.5694	3	1	1	2	0	0	mRNA-capping enzyme subunit alpha	NONE	P78587	NONE	NONE	NONE
1mg5_B_cavity_1	8	4.544	0.568	5	1	1	1	0	0	Alcohol dehydrogenase	NONE	P00334	Involved in alcohol dehydrogenase activity	NONE	NONE
1j3x_A_cavity_2	7	3.974	0.5678	3	2	0	0	2	0	High mobility group protein B2	NONE	P17741	NONE	NONE	NONE
1f0x_A_cavity_1	7	3.97	0.5671	3	2	0	1	1	0	D-lactate dehydrogenase	OXIDOREDUCTASE	DLD_ECOLI	First component of the membrane-bound D-lactate oxidase, which is believed to play an important role in the energization of the active transport of a variety of sugars and amino acids.	NONE	NONE
2zcu_A_cavity_2	7	3.969	0.567	5	0	1	1	0	0	Uncharacterized oxidoreductase ytfG	NONE	P39315	NONE	NONE	NONE
1qsa_A_cavity_2	7	3.968	0.5669	4	1	1	1	0	0	Soluble lytic murein transglycosylase precursor	NONE	P0AGC3	Cell wall/membrane/envelope biogenesis	NONE	NONE
1ith_B_cavity_1	8	4.531	0.5664	6	1	0	0	1	0	Hemoglobin F-I	NONE	P06148	NONE	NONE	NONE
1lnm_A_cavity_2	7	3.961	0.5659	5	0	1	0	1	0	Bilin-binding protein	LIGAND BINDING PROTEIN	BBP_PIEBR	This protein binds the blue pigments bilins.	NONE	NONE
1j2q_G_cavity_3	7	3.961	0.5659	3	0	3	1	0	0	Proteasome subunit alpha	NONE	O29760	NONE	NONE	NONE
2b9h_A_cavity_1	7	3.96	0.5656	3	1	1	2	0	0	Mitogen-activated protein kinase FUS3	NONE	P16892	NONE	NONE	NONE
1ifv_B_cavity_2	8	4.523	0.5654	3	1	1	0	3	0	Protein LlR18B	NONE	P52779	NONE	NONE	NONE
3bom_B_cavity_1	7	3.957	0.5653	6	0	0	0	1	0	Hemoglobin subunit alpha-4	NONE	P14527	NONE	NONE	NONE
2cst_B_cavity_1	7	3.957	0.5652	5	1	0	1	0	0	Aspartate aminotransferase, cytoplasmic	NONE	P00504	Involved in transferase activity, transferring nitrogenous groups	NONE	NONE
3bxj_A_cavity_2	7	3.956	0.5651	4	2	0	1	0	0	Ras GTPase-activating protein SynGAP	NONE	Q9QUH6	NONE	NONE	NONE
1xdt_T_cavity_3	7	3.955	0.5651	5	0	1	1	0	0	Proheparin-binding EGF-like growth factor	COMPLEX (TOXIN/GROWTH FACTOR)	HBEGF_HUMAN	May be involved in macrophage-mediated cellular proliferation. It is mitogenic for fibroblasts and smooth muscle but not endothelial cells. It is able to bind EGF receptors with higher affinity than EGF itself and is a far more potent mitogen for smooth m	NONE	NONE
1so0_C_cavity_1	7	3.949	0.5642	3	0	2	1	1	0	Aldose 1-epimerase	NONE	Q96C23	NONE	NONE	NONE
2yw2_A_cavity_3	7	3.936	0.5623	3	0	2	1	1	0	Phosphoribosylamine--glycine ligase	NONE	O66949	NONE	NONE	NONE
1sjw_A_cavity_1	8	4.488	0.561	5	0	2	1	0	0	Nogalonic acid methyl ester cyclase	NONE	Q9RN59	NONE	NONE	NONE
3h7f_B_cavity_2	8	4.488	0.5609	1	4	0	1	2	0	Serine hydroxymethyltransferase 1	NONE	O53441	NONE	NONE	NONE
1hfe_M_cavity_4	7	3.922	0.5603	3	1	1	1	1	0	Periplasmic [Fe] hydrogenase large subunit	NONE	P07598	NONE	NONE	NONE
1uxi_B_cavity_1	7	3.92	0.56	4	1	1	1	0	0	Malate dehydrogenase	NONE	P80040	Energy production and conversion	NONE	NONE
1bin_B_cavity_1	7	3.917	0.5596	6	0	0	0	1	0	Leghemoglobin A	NONE	P02238	Involved in iron ion binding	NONE	NONE
1nee_A_cavity_1	9	5.033	0.5593	5	2	1	0	1	0	Translation initiation factor 2 subunit beta	NONE	O27797	NONE	NONE	NONE
1b0n_B_cavity_1	7	3.914	0.5592	6	1	0	0	0	0	HTH-type transcriptional regulator sinR	NONE	P06533	NONE	NONE	NONE
2afj_A_cavity_3	7	3.914	0.5591	4	1	1	1	0	0	SPRY domain-containing SOCS box protein 2	NONE	O88838	NONE	NONE	NONE
1wz8_D_cavity_3	7	3.908	0.5583	5	1	1	0	0	0	Enoyl-CoA hydratase	NONE	Q5SLS5	Involved in catalytic activity	NONE	NONE
1qib_A_cavity_1	8	4.466	0.5582	4	1	1	2	0	0	72 kDa type IV collagenase	HYDROLASE	MMP2_HUMAN	In addition to gelatin and collagens, it cleaves KiSS1 at a Gly-	-Leu bond.	Defects in MMP2 are the cause of multicentric osteolysis nodulosis and arthropathy (MONA) [MIM:605156]. Inherited osteolyses or vanishing bone syndromes are rare disorders of unknown etiology characterized by destruction and resorption of affected bones. MONA is an autosomal recessive osteolysis with multicentric involvement characterized by carpal and tarsal resorption, crippling arthritic chang…	NONE
2pff_H_cavity_1	7	3.907	0.5581	4	1	1	1	0	0	Fatty acid synthase subunit alpha	NONE	P19097	NONE	NONE	NONE
1or6_B_cavity_1	7	3.906	0.558	5	1	0	1	0	0	Heme-based aerotactic transducer hemAT	NONE	O07621	Involved in signal transducer activity	NONE	NONE
2f8x_C_cavity_3	7	3.904	0.5577	4	1	1	0	1	0	Neurogenic locus notch homolog protein 1	TRANSCRIPTION/DNA	NOTC1_HUMAN	Functions as a receptor for membrane-bound ligands Jagged1, Jagged2 and Delta1 to regulate cell-fate determination. Upon ligand activation through the released notch intracellular domain (NICD) it forms a transcriptional activator complex with RBP-J kappa	NOTCH1 truncation is associated with T-cell acute lymphoblastic leukemia.;Defects in NOTCH1 are a cause of aortic valve disease [MIM:109730]. The disorder consists of an early developmental defect in the aortic valve and a later de-repression of calcium deposition that causes progressive aortic valve disease. Calcification of the aortic valve is the third leading cause of heart disease in adults.…	NONE
1n8w_A_cavity_3	7	3.897	0.5568	6	1	0	0	0	0	Malate synthase G	NONE	P0A5J4	Energy production and conversion	NONE	NONE
1yi5_I_cavity_1	7	3.897	0.5567	5	0	1	1	0	0	Acetylcholine-binding protein	NONE	P58154	Involved in extracellular ligand-gated ion channel activity	NONE	For the relief of nicotine withdrawal symptoms and as an aid to smoking cessation.
1u3r_B_cavity_1	7	3.895	0.5565	4	1	1	1	0	0	Estrogen receptor beta	TRANSCRIPTION	ESR2_HUMAN	Nuclear hormone receptor. Binds estrogens with an affinity similar to that of ESR1, and activates expression of reporter genes containing estrogen response elements (ERE) in an estrogen-dependent manner. Isoform beta-cx lacks ligand binding ability and ha	NONE	NONE
2zfu_B_cavity_1	7	3.895	0.5564	4	0	2	1	0	0	Ribosomal RNA-processing protein 8	NONE	O43159	NONE	NONE	NONE
1vcn_A_cavity_1	8	4.45	0.5562	4	1	1	1	1	0	CTP synthase	NONE	Q5SIA8	NONE	NONE	NONE
3c5k_A_cavity_1	7	3.891	0.5559	4	1	1	1	0	0	Histone deacetylase 6	HYDROLASE	HDAC6_HUMAN	Responsible for the deacetylation of lysine residues on the N-terminal part of the core histones (H2A, H2B, H3 and H4). Histone deacetylation gives a tag for epigenetic repression and plays an important role in transcriptional regulation, cell cycle progr	NONE	NONE
2ee4_A_cavity_1	8	4.442	0.5553	5	2	0	0	1	0	Rho GTPase-activating protein 5	NONE	Q13017	NONE	NONE	NONE
2a2f_X_cavity_3	8	4.438	0.5547	4	1	1	0	2	0	Exocyst complex component 6	NONE	Q9VDE6	NONE	NONE	NONE
1gtt_C_cavity_2	8	4.435	0.5543	3	1	2	2	0	0	Homoprotocatechuate catabolism bifunctional isomerase/decarboxylase	NONE	P37352	NONE	NONE	NONE
2ii4_B_cavity_2	7	3.88	0.5543	5	2	0	0	0	0	Lipoamide acyltransferase component of branched-chain alpha-keto acid dehydrogenase complex, mitochondrial	NONE	P11181	NONE	NONE	NONE
1rcp_B_cavity_1	7	3.88	0.5543	6	1	0	0	0	0	Cytochrome c	NONE	P00147	NONE	NONE	NONE
1n60_B_cavity_2	7	3.874	0.5534	5	2	0	0	0	0	Carbon monoxide dehydrogenase small chain	NONE	P19921	NONE	NONE	NONE
1aq0_B_cavity_1	7	3.873	0.5533	6	0	0	1	0	0	Lichenase-2	NONE	P12257	Involved in hydrolase activity, hydrolyzing O-glycosyl compounds	NONE	NONE
2zs0_D_cavity_1	8	4.426	0.5532	6	1	0	0	1	0	Extracellular giant hemoglobin major globin subunit A1	NONE	Q7M419	NONE	NONE	NONE
1z45_A_cavity_4	7	3.872	0.5531	3	0	2	2	0	0	GAL10 bifunctional protein [Includes: UDP-glucose 4-epimerase	NONE	P04397	Cell wall/membrane/envelope biogenesis	NONE	NONE
2fyn_M_cavity_1	7	3.869	0.5528	7	0	0	0	0	0	Cytochrome b	NONE	Q02761	NONE	NONE	NONE
2fvl_B_cavity_1	7	3.868	0.5526	4	2	0	0	1	0	Aldo-keto reductase family 1 member C4	NONE	P17516	NONE	NONE	NONE
2qeq_A_cavity_5	7	3.864	0.552	1	3	1	1	1	0	Genome polyprotein	NONE	P14335	NONE	NONE	NONE
3hmq_A_cavity_3	8	4.415	0.5519	3	2	2	1	0	0	NH(3)-dependent NAD(+) synthetase	NONE	Q8ZPU5	NONE	NONE	NONE
1q2h_C_cavity_1	8	4.411	0.5514	8	0	0	0	0	0	SH2B adapter protein 2	NONE	O14492	NONE	NONE	NONE
2ziv_B_cavity_1	7	3.859	0.5513	5	0	2	0	0	0	Crossover junction endonuclease MUS81	NONE	Q7SXA9	NONE	NONE	NONE
2i7x_A_cavity_1	7	3.859	0.5512	4	1	1	1	0	0	Cleavage and polyadenylation specificity factor subunit 3	RNA BINDING PROTEIN, PROTEIN BINDING	CPSF3_HUMAN	Component of the cleavage and polyadenylation specificity factor (CPSF) complex that play a key role in pre-mRNA 3-end formation, recognizing the AAUAAA signal sequence and interacting with poly(A) polymerase and other factors to bring about cleavage and	NONE	NONE
1lss_B_cavity_1	7	3.856	0.5508	7	0	0	0	0	0	Trk system potassium uptake protein trkA homolog	NONE	Q58505	Involved in cation transmembrane transporter activity	NONE	NONE
1qls_A_cavity_1	7	3.854	0.5506	7	0	0	0	0	0	Annexin A1	COMPLEX (LIGAND/ANNEXIN)	ANXA1_HUMAN	Calcium/phospholipid-binding protein which promotes membrane fusion and is involved in exocytosis. This protein regulates phospholipase A2 activity. It seems to bind from two to four calcium ions with high affinity.	NONE	Cancer
1e29_A_cavity_1	7	3.854	0.5506	6	1	0	0	0	0	Cytochrome c-550	NONE	Q55013	NONE	NONE	NONE
1zrt_C_cavity_4	7	3.851	0.5502	6	1	0	0	0	0	Ubiquinol-cytochrome c reductase iron-sulfur subunit	NONE	P08500	NONE	NONE	NONE
1vim_B_cavity_1	8	4.398	0.5498	5	2	0	0	1	0	Hypothetical protein AF_1796	NONE	O28478	Involved in sugar binding	NONE	NONE
2v4j_C_cavity_1	7	3.848	0.5498	5	2	0	0	0	0	Sulfite reductase, dissimilatory-type subunit alpha	NONE	P45574	NONE	NONE	NONE
1rqe_A_cavity_2	8	4.396	0.5495	5	0	2	0	1	0	Methylmalonyl-CoA carboxyltransferase 5S subunit	NONE	Q70AC7	Energy production and conversion	NONE	NONE
1me7_A_cavity_4	7	3.845	0.5493	5	1	1	0	0	0	Inosine-5-monophosphate dehydrogenase	NONE	P50097	Nucleotide transport and metabolism	NONE	For the prophylaxis of organ rejection in patients receiving allogeneic renal transplants, administered in combination with cyclosporine and corticosteroids.
3eay_A_cavity_1	7	3.841	0.5487	3	1	1	0	2	0	Sentrin-specific protease 7	HYDROLASE	SENP7_HUMAN	Protease that deconjugates SUMO2 and SUMO3 from targeted proteins, but not SUMO1. Catalyzes the deconjugation of poly-SUMO2 and poly-SUMO3 chains. Has very low efficiency in processing full- length SUMO proteins to their mature forms.	NONE	NONE
1tvm_A_cavity_1	7	3.838	0.5483	7	0	0	0	0	0	Galactitol-specific phosphotransferase enzyme IIB component	NONE	P0A436	NONE	NONE	NONE
2r6w_A_cavity_1	8	4.382	0.5478	4	1	1	2	0	0	Estrogen receptor	TRANSCRIPTION	ESR1_HUMAN	Nuclear hormone receptor. The steroid hormones and their receptors are involved in the regulation of eukaryotic gene expression and affect cellular proliferation and differentiation in target tissues.	NONE	Melanoma;Brain tumor;Inflammation;Myocardial infarction;Fibrosis;Brain ischemia;Psoriasis;Rheumatoid arthritis;Retinitis pigmentosa;Atherosclerosis;Genitourinary disease;Breast disease;Atrophy;Crohns disease;Testosterone deficiency;Uterine fibroids;Fibrocystic breast disease;Arthralgia;Prostatitis;Prostate hyperplasia;Inflammatory bowel disease;Solid tumor;Gynecological disorder;Vascular disease;…
1j7x_A_cavity_3	7	3.829	0.5471	4	1	1	1	0	0	Retinol-binding protein 3	NONE	Q7SZI7	NONE	NONE	NONE
1ntg_D_cavity_1	7	3.829	0.547	4	0	2	1	0	0	Tyrosyl-tRNA synthetase, cytoplasmic	NONE	P54577	Translation, ribosomal structure and biogenesis	NONE	Tyrosine is claimed to act as an effective antidepressant, however results are mixed. Tyrosine has also been claimed to reduce stress and combat narcolepsy and chronic fatigue, however these claims have been refuted by some studies.
3ed1_C_cavity_1	7	3.829	0.5469	3	0	2	2	0	0	Gibberellin receptor GID1	NONE	Q6L545	NONE	NONE	NONE
2f4n_C_cavity_1	9	4.921	0.5468	3	1	2	3	0	0	Uncharacterized protein MJ1651	NONE	Q59045	NONE	NONE	NONE
1v7m_H_cavity_1	8	4.375	0.5468	5	0	2	1	0	0	Thrombopoietin	NONE	P40225	NONE	NONE	NONE
2j4k_A_cavity_2	7	3.827	0.5467	5	1	1	0	0	0	Uridylate kinase	NONE	Q97ZE2	NONE	NONE	NONE
1dml_E_cavity_1	8	4.371	0.5463	5	0	2	0	1	0	DNA polymerase processivity factor	NONE	P10226	NONE	NONE	NONE
2bcg_G_cavity_1	7	3.823	0.5462	7	0	0	0	0	0	Rab GDP-dissociation inhibitor	NONE	P39958	NONE	NONE	NONE
2wad_A_cavity_4	7	3.823	0.5461	2	1	1	0	3	0	Penicillin-binding protein 2B	NONE	P0A3M6	NONE	NONE	NONE
2csj_A_cavity_1	7	3.819	0.5455	4	1	1	1	0	0	Tight junction protein ZO-2	NONE	Q9Z0U1	NONE	NONE	NONE
2ge9_A_cavity_2	7	3.817	0.5452	6	1	0	0	0	0	Tyrosine-protein kinase BTK	TRANSFERASE	BTK_HUMAN	Plays a crucial role in B-cell ontogeny. Transiently phosphorylates GTF2I on tyrosine residues in response to B-cell receptor cross-linking. Required for the formation of functional ARID3A DNA-binding complexes.	Defects in BTK are the cause of X-linked agammaglobulinemia type 1 (XLA) [MIM:300300]. XLA is a humoral immunodeficiency disease which results in developmental defects in the maturation pathway of B-cells. Affected boys have normal levels of pre-B-cells in their bone marrow but virtually no circulating mature B-lymphocytes. This results in a lack of immunoglobulins of all classes and leads to rec…	Autoimmune disease;Lymphoma
2zv8_A_cavity_2	11	5.993	0.5448	5	2	1	3	0	0	Tyrosine-protein kinase Lyn	NONE	P25911	NONE	NONE	NONE
3csk_A_cavity_5	7	3.814	0.5448	3	0	2	1	1	0	Probable dipeptidyl-peptidase 3	NONE	Q08225	NONE	NONE	NONE
1lns_A_cavity_2	7	3.812	0.5445	3	0	2	1	1	0	Xaa-Pro dipeptidyl-peptidase	NONE	P22346	NONE	NONE	NONE
2acm_B_cavity_1	7	3.808	0.544	6	1	0	0	0	0	Mucin-1	NONE	P15941	NONE	NONE	NONE
2izo_A_cavity_2	7	3.806	0.5437	5	0	2	0	0	0	Flap structure-specific endonuclease	NONE	Q980U8	NONE	NONE	NONE
1o75_A_cavity_2	7	3.804	0.5435	1	5	1	0	0	0	47 kDa membrane antigen	NONE	P29723	This antigen is a pathogen-specific membrane immunogen. Most abundant of the membrane lipoproteins, only found so far in pathogenic treponemes, suggesting that it is an important structural moiety in the cell envelope of virulent treponemal subspecies	NONE	NONE
2w9h_A_cavity_1	9	4.889	0.5432	5	1	1	1	1	0	Dihydrofolate reductase	NONE	P0A017	NONE	NONE	NONE
1c0l_A_cavity_2	7	3.802	0.5432	6	1	0	0	0	0	D-amino-acid oxidase	NONE	P80324	Amino acid transport and metabolism	NONE	NONE
1wdm_D_cavity_3	7	3.802	0.5431	6	0	1	0	0	0	Fatty acid oxidation complex subunit alpha	NONE	P28793	NONE	NONE	NONE
1l7b_A_cavity_1	7	3.802	0.5431	5	0	1	1	0	0	DNA ligase	NONE	P26996	NONE	NONE	NONE
2dy3_C_cavity_1	9	4.887	0.543	5	1	1	0	2	0	Alanine racemase	NONE	Q8RSU9	NONE	NONE	NONE
1t57_C_cavity_3	8	4.342	0.5427	2	2	3	0	1	0	Conserved protein	NONE	O27711	Involved in magnesium ion binding	NONE	NONE
1oi8_B_cavity_2	7	3.796	0.5423	4	1	1	1	0	0	Protein ushA	NONE	P07024	Involved in hydrolase activity	NONE	NONE
1n97_A_cavity_2	7	3.795	0.5421	6	1	0	0	0	0	Cytochrome P450	NONE	Q746J6	Involved in monooxygenase activity	NONE	NONE
2d86_A_cavity_1	7	3.793	0.5418	4	1	1	1	0	0	Guanine nucleotide exchange factor VAV3	NONE	Q9UKW4	NONE	NONE	NONE
2vwt_A_cavity_1	9	4.872	0.5414	6	2	0	0	1	0	2-keto-3-deoxy-L-rhamnonate aldolase	NONE	P76469	NONE	NONE	NONE
1i9y_A_cavity_2	8	4.323	0.5404	1	2	2	2	1	0	Inositol-1,4,5-trisphosphate 5-phosphatase 1	NONE	O43001	Involved in inositol or phosphatidylinositol phosphatase activity	NONE	NONE
1dnv_A_cavity_1	9	4.863	0.5403	7	1	0	0	1	0	Coat protein VP1/VP2/VP3/VP4	NONE	Q90125	NONE	NONE	NONE
2pph_A_cavity_1	9	4.86	0.54	3	2	1	1	2	0	Mitogen-activated protein kinase kinase kinase 3	TRANSFERASE	M3K3_HUMAN	Component of a protein kinase signal transduction cascade. Mediates activation of the NF-kappa-B, AP1 and DDIT3 transcriptional regulators.	NONE	NONE
1a57_A_cavity_1	9	4.849	0.5388	5	1	1	2	0	0	Fatty acid-binding protein, intestinal	NONE	P02693	Involved in transporter activity	NONE	NONE
1gqg_A_cavity_2	8	4.3	0.5375	5	1	1	0	1	0	Quercetin 2,3-dioxygenase	NONE	Q7SIC2	Involved in quercetin 2,3-dioxygenase activity	NONE	NONE
1u2e_D_cavity_1	8	4.289	0.5361	5	1	1	0	1	0	2-hydroxy-6-oxononadienedioate/2-hydroxy-6-oxononatrienedioate hydrolase	NONE	P77044	NONE	NONE	NONE
2i5p_O_cavity_1	8	4.289	0.5361	6	1	1	0	0	0	Glyceraldehyde-3-phosphate dehydrogenase 1	NONE	P84998	NONE	NONE	NONE
1v6a_A_cavity_2	8	4.28	0.535	4	0	2	0	2	0	L-lactate dehydrogenase A chain	NONE	Q9W7K5	NONE	NONE	NONE
1z5l_C_cavity_1	9	4.811	0.5345	5	1	1	0	2	0	T-cell surface glycoprotein CD1d1	NONE	P11609	Not known	NONE	NONE
2a9e_A_cavity_2	9	4.804	0.5338	3	2	1	0	3	0	Catalase	NONE	P77872	Involved in catalase activity	NONE	NONE
1zno_B_cavity_1	8	4.265	0.5331	2	5	0	0	1	0	UPF0244 protein VC_0702	NONE	Q9KU27	NONE	NONE	NONE
2czt_A_cavity_1	9	4.796	0.5329	7	0	1	0	1	0	Prostaglandin-H2 D-isomerase	NONE	O09114	NONE	NONE	NONE
1moh_A_cavity_1	8	4.245	0.5306	6	0	1	0	1	0	Hemoglobin-1	NONE	P41260	Involved in iron ion binding	NONE	NONE
1h21_C_cavity_2	8	4.245	0.5306	6	2	0	0	0	0	Split-Soret cytochrome c	NONE	P81040	Diheme cytochrome c which may be involved in sulfate reduction	NONE	NONE
9aat_B_cavity_1	8	4.231	0.5288	4	2	0	1	1	0	Aspartate aminotransferase, mitochondrial	NONE	P00508	Amino acid transport and metabolism	NONE	NONE
1ch4_A_cavity_1	9	4.738	0.5264	7	0	1	0	1	0	Hemoglobin subunit beta	OXYGEN TRANSPORT	HBB_HUMAN	Involved in oxygen transport from the lung to the various peripheral tissues.;LVV-hemorphin-7 potentiates the activity of bradykinin, causing a decrease in blood pressure.	Defects in HBB may be a cause of Heinz body anemias [MIM:140700]. This is a form of non-spherocytic hemolytic anemia of Dacie type 1. After splenectomy, which has little benefit, basophilic inclusions called Heinz bodies are demonstrable in the erythrocytes. Before splenectomy, diffuse or punctate basophilia may be evident. Most of these cases are probably instances of hemoglobinopathy. The hemog…	NONE
1q1l_C_cavity_3	8	4.211	0.5264	5	1	1	0	1	0	Chorismate synthase	NONE	O66493	NONE	NONE	NONE
2uxw_A_cavity_1	15	7.884	0.5256	7	1	3	4	0	0	Very long-chain specific acyl-CoA dehydrogenase, mitochondrial	NONE	P49748	NONE	NONE	NONE
1v0p_B_cavity_2	8	4.202	0.5253	3	2	1	1	1	0	Cell division control protein 2 homolog	NONE	Q07785	Involved in protein kinase activity	NONE	NONE
1ouu_B_cavity_1	8	4.199	0.5249	5	0	1	0	2	0	Hemoglobin subunit alpha-1	NONE	P02019	NONE	NONE	NONE
2be1_B_cavity_1	8	4.198	0.5247	6	1	1	0	0	0	Serine/threonine-protein kinase/endoribonuclease IRE1	NONE	P32361	Senses unfolded proteins in the lumen of the endoplasmic reticulum via its N-terminal domain which leads to enzyme auto-activation. The active endoribonuclease domain splices HAC1 precursor mRNA to produce the mature form which then induces transcription of UPR target genes.	NONE	NONE
1a6z_C_cavity_1	8	4.195	0.5244	4	1	2	0	1	0	Hereditary hemochromatosis protein	NONE	Q30201	NONE	NONE	NONE
1oqs_H_cavity_1	8	4.184	0.523	5	1	1	1	0	0	Phospholipase A2 RV-7	NONE	P31100	NONE	NONE	NONE
2ql6_E_cavity_1	8	4.181	0.5226	4	1	1	1	1	0	Nicotinamide riboside kinase 1	SIGNALING PROTEIN,TRANSFERASE	NRK1_HUMAN	Catalyzes the phosphorylation of nicotinamide riboside (NR) and nicotinic acid riboside (NaR) to form nicotinamide mononucleotide (NMN) and nicotinic acid mononucleotide (NaMN). The enzyme also phosphorylates the antitumor drugs tiazofurin and 3- deazagua	NONE	NONE
1xp3_A_cavity_1	9	4.693	0.5215	3	1	2	2	1	0	Probable endonuclease 4	NONE	Q81LV1	NONE	NONE	NONE
2b7m_A_cavity_1	8	4.171	0.5214	6	1	1	0	0	0	Exocyst complex component EXO70	NONE	P19658	NONE	NONE	NONE
1set_B_cavity_2	8	4.169	0.5211	3	1	2	1	1	0	Seryl-tRNA synthetase	NONE	P34945	NONE	NONE	NONE
2c0o_A_cavity_2	16	8.335	0.5209	6	2	3	5	0	0	Tyrosine-protein kinase HCK	TRANSFERASE	HCK_HUMAN	May serve as part of a signaling pathway coupling the Fc receptor to the activation of the respiratory burst. May also contribute to neutrophil migration and may regulate the degranulation process of neutrophils.	NONE	NONE
1sr8_A_cavity_2	8	4.161	0.5201	4	2	1	1	0	0	Putative cobalt-precorrin-6A synthase [deacetylating]	NONE	O29535	NONE	NONE	NONE
1wfi_A_cavity_1	8	4.157	0.5197	4	2	1	0	1	0	Nuclear migration protein nudC	NONE	O35685	NONE	NONE	NONE
2hzb_A_cavity_1	14	7.269	0.5192	8	2	1	3	0	0	UPF0052 protein BH3568	NONE	Q9K706	NONE	NONE	NONE
2ijx_A_cavity_2	8	4.151	0.5189	5	0	2	1	0	0	DNA polymerase sliding clamp A	NONE	P57765	NONE	NONE	NONE
1c7i_A_cavity_1	9	4.663	0.5181	3	3	1	1	1	0	Para-nitrobenzyl esterase	NONE	P37967	NONE	NONE	NONE
1x5f_A_cavity_1	8	4.137	0.5171	5	1	1	0	1	0	Neogenin	NONE	Q92859	NONE	NONE	NONE
1unh_A_cavity_1	9	4.653	0.517	3	1	2	3	0	0	Cyclin-dependent kinase 5 activator 1	COMPLEX(KINASE/ACTIVATOR)	CD5R1_HUMAN	p35 is a neuron specific activator of CDK5. The complex p35/CDK5 is required for neurite outgrowth and cortical lamination. Activator of TPKII.	Cleavage of p35 to p25 may be involved in the pathogenesis of Alzheimer disease. The p25 form accumulates in neurons in the brain of patients with Alzheimer disease, but not in normal brain. This accumulation correlates with an increase in CDK5 kinase activity. Application of amyloid beta peptide A- beta(1-42) induced the conversion of p35 to p25 in primary cortical neurons. Expression of the p25…	Neurodegenerative disease
1lfk_A_cavity_1	8	4.133	0.5167	1	1	3	2	1	0	Cytochrome P450 165B3	NONE	Q8RN04	Involved in monooxygenase activity	NONE	NONE
2ett_A_cavity_1	9	4.649	0.5165	4	2	1	1	1	0	Sorting nexin-22	NONE	Q96L94	NONE	NONE	NONE
1fcg_A_cavity_1	8	4.126	0.5158	3	2	1	1	1	0	Low affinity immunoglobulin gamma Fc region receptor II-a	IMMUNE SYSTEM, MEMBRANE PROTEIN	FCG2A_HUMAN	Binds to the Fc region of immunoglobulins gamma. Low affinity receptor. By binding to IgG it initiates cellular responses against pathogens and soluble antigens.	NONE	NONE
2ywh_A_cavity_2	9	4.634	0.5149	5	1	1	2	0	0	GTP-binding protein lepA	NONE	O67618	NONE	NONE	NONE
1e9a_A_cavity_1	8	4.118	0.5147	2	2	1	3	0	0	Thymidylate kinase	PHOSPHOTRANSFERASE	KTHY_HUMAN	Catalyzes the conversion of dTMP to dTDP.	NONE	NONE
1nba_A_cavity_2	8	4.11	0.5138	5	1	1	1	0	0	N-carbamoylsarcosine amidase	NONE	P32400	NONE	NONE	NONE
1ux6_A_cavity_1	8	4.108	0.5135	4	0	2	1	1	0	Thrombospondin-1	CELL ADHESION	TSP1_HUMAN	Adhesive glycoprotein that mediates cell-to-cell and cell-to-matrix interactions. Can bind to fibrinogen, fibronectin, laminin, type V collagen and integrins alpha-V/beta-1, alpha- V/beta-3 and alpha-IIb/beta-3.	NONE	NONE
1h3o_B_cavity_1	9	4.621	0.5134	9	0	0	0	0	0	Transcription initiation factor TFIID subunit 4	NONE	O00268	NONE	NONE	NONE
1g2x_A_cavity_1	9	4.62	0.5133	4	1	2	2	0	0	Phospholipase A2 KPA2	NONE	Q9DF52	Involved in phospholipase A2 activity	NONE	NONE
3gyr_C_cavity_4	8	4.102	0.5127	3	2	0	1	2	0	Phenoxazinone synthase	NONE	Q53692	NONE	NONE	NONE
2id4_B_cavity_3	9	4.613	0.5126	4	2	1	0	2	0	Kexin	NONE	P13134	NONE	NONE	NONE
1ig7_A_cavity_1	8	4.097	0.5121	4	3	0	0	1	0	Homeobox protein MSX-1	NONE	P13297	NONE	NONE	NONE
1e6v_F_cavity_1	9	4.608	0.512	4	2	1	0	2	0	Methyl-coenzyme M reductase I subunit alpha	NONE	Q49605	NONE	NONE	NONE
1jnd_A_cavity_1	12	6.14	0.5116	6	1	2	0	3	0	Chitinase-like protein Idgf2	NONE	Q9V3D4	Involved in nutrient reservoir activity	NONE	NONE
3hzq_A_cavity_1	8	4.09	0.5113	6	0	2	0	0	0	Large-conductance mechanosensitive channel	NONE	P68806	NONE	NONE	NONE
2v5h_C_cavity_1	9	4.601	0.5112	6	2	0	0	1	0	Acetylglutamate kinase	NONE	Q6V1L5	NONE	NONE	NONE
1h97_B_cavity_1	9	4.596	0.5107	7	0	1	0	1	0	Globin-3	NONE	P80721	Involved in iron ion binding	NONE	NONE
1t3k_A_cavity_2	8	4.083	0.5103	4	2	1	0	1	0	Dual specificity phosphatase Cdc25	NONE	Q8GY31	NONE	NONE	NONE
3b46_B_cavity_2	8	4.082	0.5102	4	2	0	2	0	0	Probable kynurenine--oxoglutarate transaminase BNA3	NONE	P47039	NONE	NONE	NONE
2cls_B_cavity_1	8	4.077	0.5096	2	3	1	2	0	0	Rho-related GTP-binding protein Rho6	NONE	Q92730	NONE	NONE	NONE
2uxt_B_cavity_1	8	4.074	0.5093	3	1	2	2	0	0	Protein sufI	NONE	P26648	NONE	NONE	NONE
1k4y_A_cavity_3	8	4.065	0.5081	6	0	1	0	1	0	Liver carboxylesterase 1	NONE	P12337	Lipid transport and metabolism	NONE	NONE
2jhe_B_cavity_1	8	4.062	0.5077	5	0	1	1	1	0	Transcriptional regulatory protein tyrR	NONE	P07604	NONE	NONE	NONE
1ef1_D_cavity_1	9	4.564	0.5071	5	2	0	0	2	0	Moesin	NONE	P26038	NONE	NONE	NONE
5cgt_A_cavity_5	8	4.057	0.5071	3	0	3	1	1	0	Cyclomaltodextrin glucanotransferase	NONE	P30920	Carbohydrate transport and metabolism	NONE	NONE
1y4c_A_cavity_2	8	4.055	0.5068	4	1	1	2	0	0	Maltose-binding periplasmic protein	NONE	P0AEY0	Involved in the high-affinity maltose membrane transport system MalEFGK. Initial receptor for the active transport of and chemotaxis toward maltooligosaccharides (By similarity).	NONE	NONE
2veq_A_cavity_5	8	4.053	0.5066	4	1	1	0	2	0	Centromere DNA-binding protein complex CBF3 subunit B	NONE	P40969	NONE	NONE	NONE
1iyk_A_cavity_1	8	4.05	0.5062	7	1	0	0	0	0	Glycylpeptide N-tetradecanoyltransferase	NONE	P30418	Involved in glycylpeptide N-tetradecanoyltransferase activity	NONE	NONE
3c0r_C_cavity_1	8	4.048	0.506	4	2	1	0	1	0	Ubiquitin thioesterase OTU1	NONE	P43558	NONE	NONE	NONE
2oeq_C_cavity_1	9	4.551	0.5057	7	1	1	0	0	0	UPF0342 protein GK0640	NONE	Q5L2A5	NONE	NONE	NONE
1dpp_A_cavity_4	8	4.038	0.5048	3	0	3	2	0	0	Periplasmic dipeptide transport protein	NONE	P23847	NONE	NONE	NONE
2r6z_B_cavity_1	11	5.542	0.5039	5	2	2	2	0	0	UPF0341 protein in rsp 3region	NONE	P72077	NONE	NONE	NONE
2ayl_B_cavity_6	8	4.031	0.5039	5	1	0	0	2	0	Prostaglandin G/H synthase 1	NONE	P05979	Involved in peroxidase activity	NONE	NONE
1d5y_D_cavity_1	8	4.03	0.5037	4	2	0	1	1	0	Right origin-binding protein	NONE	P0ACI0	NONE	NONE	NONE
2pwr_B_cavity_1	8	4.025	0.5031	4	1	2	1	0	0	Gag-Pol polyprotein	NONE	P03367	Gag-Pol polyprotein and Gag polyprotein may regulate their own translation, by the binding genomic RNA in the 5'-UTR. At low concentration, Gag-Pol and Gag would promote translation, whereas at high concentration, the polyproteins encapsidate genomic RNA and then shutt off translation (By similarity).	NONE	NONE
