# Supplementary material for: Network Pharmacology-Based Prediction and Verification of the Targets and Mechanism for Panax Notoginseng Saponins against Coronary Heart Disease
Source: Evid Based Complement Alternat Med. 2019 Jul 3;2019:6503752. doi: 10.1155/2019/6503752 (PMC6636530; doi:10.1155/2019/6503752)
Supplement: Supplementary Materials — The supplementary materials contain 5 files which are the top 300 potential targets of each compound predicted from Pharmmapper Server. [file 6503752.f1.zip › 6503752.f1/Ginsenoside Rd qt.csv]

Ligand: MOL007480
Pharma Model	Num Feature	Fit	Norm Fit	Num Hydrophobic	Num HB Acceptor	Num HB Donor	Num Positive	Num Negative	Num Aromatic	Name	Class	Uniplot	Function	Disease	Idication
2lck_A_cavity_2	4	3.874	0.9686	4	0	0	0	0	0	NONE	NONE	NONE	NONE	NONE	NONE
3d64_A_cavity_2	4	3.766	0.9414	4	0	0	0	0	0	Adenosylhomocysteinase	NONE	Q3JY79	NONE	NONE	NONE
2k9p_A_cavity_1	4	3.614	0.9035	4	0	0	0	0	0	Pheromone alpha factor receptor	NONE	P06842	NONE	NONE	NONE
2aj7_B_cavity_2	4	3.58	0.8951	4	0	0	0	0	0	Flagellar assembly factor fliW	NONE	Q9K6V7	NONE	NONE	NONE
3d3l_B_cavity_3	5	3.932	0.7864	3	0	1	0	1	0	Arachidonate 12-lipoxygenase, 12S-type	NONE	P18054	NONE	NONE	NONE
1qox_N_cavity_2	5	3.909	0.7817	3	1	0	1	0	0	Beta-glucosidase	NONE	Q03506	NONE	NONE	NONE
1x65_A_cavity_1	6	4.682	0.7804	4	1	0	0	1	0	Cold shock domain-containing protein E1	NONE	O75534	NONE	NONE	NONE
3fqd_A_cavity_8	5	3.852	0.7704	3	1	0	0	1	0	5-3 exoribonuclease 2	NONE	P40848	NONE	NONE	NONE
1r8u_A_cavity_1	5	3.806	0.7613	5	0	0	0	0	0	Cbp/p300-interacting transactivator 2	TRANSCRIPTION/TRANSCRIPTION ACTIVATOR	CITE2_HUMAN	Interferes with the binding of transcription factors HIF-1a and STAT2 to p300/CBP.	NONE	NONE
2gp6_B_cavity_1	5	3.787	0.7574	5	0	0	0	0	0	3-oxoacyl-[acyl-carrier-protein] synthase 2	NONE	P63456	NONE	NONE	NONE
1ggz_A_cavity_2	5	3.756	0.7512	5	0	0	0	0	0	Calmodulin-like protein 3	NONE	P27482	NONE	NONE	NONE
1ggt_A_cavity_2	5	3.725	0.745	4	1	0	0	0	0	Coagulation factor XIII A chain	BLOOD COAGULATION	F13A_HUMAN	Factor XIII is activated by thrombin and calcium ion to a transglutaminase that catalyzes the formation of gamma-glutamyl- epsilon-lysine cross-links between fibrin chains, thus stabilizing the fibrin clot. Also cross-link alpha-2-plasmin inhibitor, or fi	Defects in F13A1 are the cause of F13A deficiency [MIM:134570]. F13A deficiency is an autosomal recessive disorder characterized by a life-long bleeding tendency, impaired wound healing and spontaneous abortion in affected women. In addition to the common presentation such as subcutaneous and intramuscular haematomas, severe bleeding such as intracranial hemorrhages may occur.	NONE
1win_A_cavity_1	5	3.702	0.7404	3	1	0	1	0	0	Flotillin-2	NONE	Q60634	NONE	NONE	NONE
2ayn_C_cavity_2	5	3.679	0.7358	3	1	0	1	0	0	Ubiquitin carboxyl-terminal hydrolase 14	HYDROLASE	UBP14_HUMAN	NONE	NONE	NONE
2es0_A_cavity_1	5	3.664	0.7328	5	0	0	0	0	0	Regulator of G-protein signaling 6	SIGNALING PROTEIN	RGS6_HUMAN	Inhibits signal transduction by increasing the GTPase activity of G protein alpha subunits thereby driving them into their inactive GDP-bound form. Activity on G(o)-alpha is specifically enhanced by the RGS6/Gbeta5 dimer.	NONE	NONE
2hhk_M_cavity_5	5	3.65	0.7299	4	1	0	0	0	0	Reaction center protein H chain	NONE	P0C0Y7	NONE	NONE	NONE
2v62_B_cavity_2	5	3.624	0.7248	4	1	0	0	0	0	Serine/threonine-protein kinase VRK2	TRANSFERASE	VRK2_HUMAN	Probable serine/threonine kinase (By similarity).	NONE	NONE
2ay0_E_cavity_1	5	3.62	0.724	5	0	0	0	0	0	Bifunctional protein putA	NONE	P09546	Energy production and conversion	NONE	NONE
2fv4_B_cavity_1	5	3.613	0.7226	4	1	0	0	0	0	Kinetochore protein SPC25	NONE	P40014	NONE	NONE	NONE
2h08_A_cavity_1	5	3.611	0.7222	5	0	0	0	0	0	Ribose-phosphate pyrophosphokinase 1	NONE	P60891	NONE	NONE	NONE
1iq3_A_cavity_1	5	3.597	0.7193	5	0	0	0	0	0	RalBP1-associated Eps domain-containing protein 2	NONE	Q8NFH8	NONE	NONE	NONE
1tg6_A_cavity_2	6	4.307	0.7178	4	1	0	0	1	0	Putative ATP-dependent Clp protease proteolytic subunit, mitochondrial	HYDROLASE	CLPP_HUMAN	Clp cleaves peptides in various proteins in a process that requires ATP hydrolysis. Clp may be responsible for a fairly general and central housekeeping function rather than for the degradation of specific substrates.	NONE	NONE
1zvs_A_cavity_3	5	3.587	0.7174	3	0	1	1	0	0	Beta-2-microglobulin	NONE	P61769	NONE	NONE	NONE
3g9k_S_cavity_1	5	3.574	0.7148	5	0	0	0	0	0	Capsule biosynthesis protein capD	NONE	Q51693	NONE	NONE	NONE
1lbm_A_cavity_1	5	3.562	0.7125	4	1	0	0	0	0	N-(5-phosphoribosyl)anthranilate isomerase	NONE	Q56320	Involved in phosphoribosylanthranilate isomerase activity	NONE	NONE
1wde_A_cavity_2	5	3.559	0.7117	3	1	0	1	0	0	Probable diphthine synthase	NONE	Q9YDI2	NONE	NONE	NONE
1l0v_P_cavity_2	5	3.559	0.7117	5	0	0	0	0	0	Fumarate reductase flavoprotein subunit	OXIDOREDUCTASE	FRDA_ECOLI	Two distinct, membrane-bound, FAD-containing enzymes are responsible for the catalysis of fumarate and succinate interconversion; the fumarate reductase is used in anaerobic growth, and the succinate dehydrogenase is used in aerobic growth.	NONE	NONE
1xes_A_cavity_1	5	3.552	0.7104	5	0	0	0	0	0	Dihydropinosylvin synthase	NONE	Q02323	NONE	NONE	NONE
1so0_C_cavity_2	5	3.535	0.707	3	0	1	0	1	0	Aldose 1-epimerase	NONE	Q96C23	NONE	NONE	NONE
1nsh_B_cavity_1	5	3.515	0.703	5	0	0	0	0	0	Protein S100-A11	NONE	P24480	NONE	NONE	NONE
1kv9_A_cavity_3	5	3.513	0.7026	4	1	0	0	0	0	Quinohemoprotein alcohol dehydrogenase ADH IIB	NONE	Q8GR64	Involved in iron ion binding	NONE	NONE
2bty_A_cavity_1	5	3.508	0.7016	5	0	0	0	0	0	Acetylglutamate kinase	NONE	Q9X2A4	NONE	NONE	NONE
2gfq_A_cavity_2	5	3.49	0.698	3	0	1	0	1	0	D-tyrosyl-tRNA(Tyr) deacylase	NONE	O57774	NONE	NONE	NONE
3eap_D_cavity_1	5	3.488	0.6977	5	0	0	0	0	0	Rho GTPase-activating protein 11A	NONE	Q6P4F7	NONE	NONE	NONE
3b6x_B_cavity_1	5	3.488	0.6975	5	0	0	0	0	0	General odorant-binding protein lush	NONE	O02372	Involved in odorant binding	NONE	NONE
2jqe_A_cavity_1	5	3.461	0.6923	4	0	1	0	0	0	Signal recognition 54 kDa protein	NONE	O29633	NONE	NONE	NONE
1fi6_A_cavity_2	5	3.448	0.6896	5	0	0	0	0	0	RalBP1-associated Eps domain-containing protein 1	NONE	O54916	NONE	NONE	NONE
3g0z_A_cavity_1	5	3.447	0.6893	3	0	1	0	1	0	Poly(A) ribonuclease pop2	NONE	O74856	NONE	NONE	NONE
2nq2_B_cavity_2	5	3.44	0.6881	3	0	1	0	1	0	Probable ABC transporter permease protein HI1471	NONE	Q57130	NONE	NONE	NONE
1ukf_A_cavity_1	6	4.113	0.6855	4	1	0	0	1	0	Cysteine protease avirulence protein avrPphB	NONE	Q52430	NONE	NONE	NONE
2hka_C_cavity_1	6	4.08	0.6799	6	0	0	0	0	0	Epididymal secretory protein E1	NONE	P79345	NONE	NONE	NONE
1sjw_A_cavity_1	8	5.346	0.6683	5	0	2	1	0	0	Nogalonic acid methyl ester cyclase	NONE	Q9RN59	NONE	NONE	NONE
1ml8_A_cavity_1	6	3.988	0.6647	6	0	0	0	0	0	Protein yhfA	NONE	P0ADX3	NONE	NONE	NONE
2dmy_A_cavity_1	6	3.986	0.6643	3	3	0	0	0	0	Spermatid perinuclear RNA-binding protein	NONE	Q96SI9	NONE	NONE	NONE
1p32_C_cavity_1	6	3.985	0.6641	3	0	1	2	0	0	Complement component 1 Q subcomponent-binding protein, mitochondrial	NONE	Q07021	NONE	NONE	NONE
2jpe_A_cavity_1	6	3.984	0.664	5	1	0	0	0	0	Nuclear inhibitor of protein phosphatase 1	NONE	Q8R3G1	NONE	NONE	NONE
1k44_E_cavity_1	6	3.916	0.6526	4	1	0	0	1	0	Nucleoside diphosphate kinase	NONE	P84284	NONE	NONE	NONE
2in5_A_cavity_2	6	3.899	0.6499	2	0	2	0	2	0	Uncharacterized lipoprotein gfcB	NONE	P75884	NONE	NONE	NONE
1k8g_B_cavity_2	6	3.897	0.6495	4	0	1	0	1	0	Telomere-binding protein subunit alpha	NONE	P29549	NONE	NONE	NONE
1s5a_A_cavity_1	7	4.546	0.6494	3	1	1	2	0	0	Hypothetical protein yesE	NONE	O31511	NONE	NONE	NONE
2xat_A_cavity_2	6	3.888	0.648	4	0	1	1	0	0	Chloramphenicol acetyltransferase	NONE	P26841	Involved in acyltransferase activity	NONE	Used in treatment of cholera, as it destroys the vibrios and decreases the diarrhea. It is effective against tetracycline-resistant vibrios. It is also used in eye drops or ointment to treat bacterial conjunctivitis.
1xap_A_cavity_1	6	3.872	0.6453	5	1	0	0	0	0	Retinoic acid receptor beta	TRANSCRIPTION	RARB_HUMAN	This is a receptor for retinoic acid. This metabolite has profound effects on vertebrate development. Retinoic acid is a morphogen and is a powerful teratogen. This receptor controls cell function by directly regulating gene expression.	NONE	Psoriasis;Acne;Cancer
1s40_A_cavity_2	6	3.862	0.6437	4	1	0	0	1	0	Cell division control protein 13	NONE	P32797	NONE	NONE	NONE
1tdj_A_cavity_3	6	3.84	0.6401	4	0	1	1	0	0	Threonine dehydratase biosynthetic	NONE	P04968	Catalyzes the anaerobic formation of alpha-ketobutyrate and ammonia from threonine in a two-step reaction. The first step involved a dehydration of threonine and a production of enamine intermediates (aminocrotonate), which tautomerizes to its imine form (iminobutyrate). Both intermediates are unstable and short-lived. The second step is the nonenzymatic hydrolysis of the enamine/imine intermedia…	NONE	NONE
1lrw_C_cavity_2	6	3.815	0.6359	2	2	0	2	0	0	Methanol dehydrogenase subunit 1	NONE	P12293	NONE	NONE	NONE
1sed_A_cavity_1	6	3.815	0.6358	5	0	1	0	0	0	Hypothetical protein yhaI	NONE	O07517	NONE	NONE	NONE
1jv1_A_cavity_3	6	3.811	0.6352	3	1	1	1	0	0	UDP-N-acetylhexosamine pyrophosphorylase	NONE	Q16222	Involved in nucleotidyltransferase activity	NONE	NONE
3dh4_D_cavity_3	6	3.811	0.6351	6	0	0	0	0	0	Sodium/glucose cotransporter	TRANSPORT PROTEIN	SGLT_VIBPA	Actively transports glucose into cells by Na(+) cotransport (By similarity).	NONE	Diabetes mellitus;Non-insulin dependent diabetes;Obesity
3dra_B_cavity_4	6	3.809	0.6349	5	0	1	0	0	0	Protein farnesyltransferase/geranylgeranyltransferase type-1 subunit alpha	NONE	Q9Y765	NONE	NONE	NONE
1tu9_A_cavity_1	6	3.799	0.6332	4	1	0	0	1	0	Hypothetical protein	NONE	Q9HX49	Involved in iron ion binding	NONE	NONE
2hyd_A_cavity_2	6	3.798	0.633	6	0	0	0	0	0	Putative multidrug export ATP-binding/permease protein SAV1866	NONE	Q99T13	NONE	NONE	NONE
3ibv_B_cavity_1	6	3.797	0.6328	5	1	0	0	0	0	Exportin-T	NONE	O94258	NONE	NONE	NONE
2nqb_G_cavity_1	6	3.791	0.6319	6	0	0	0	0	0	Histone H3	NONE	P02299	NONE	NONE	NONE
1c8v_A_cavity_3	6	3.791	0.6318	4	0	1	1	0	0	Tryptophan synthase alpha chain	NONE	P00929	NONE	NONE	NONE
1wjt_A_cavity_1	6	3.788	0.6313	6	0	0	0	0	0	Transcription elongation factor A protein 3	NONE	P23881	NONE	NONE	NONE
2vde_C_cavity_1	6	3.784	0.6307	3	1	1	1	0	0	Outer membrane protein tolC	NONE	P02930	Cell wall/membrane/envelope biogenesis	NONE	NONE
2bj3_A_cavity_1	6	3.784	0.6306	6	0	0	0	0	0	Putative nickel-responsive regulator	NONE	O58316	Involved in DNA binding	NONE	NONE
3gos_B_cavity_1	6	3.78	0.63	5	1	0	0	0	0	2,3,4,5-tetrahydropyridine-2,6-dicarboxylate N-succinyltransferase	NONE	Q8ZH69	NONE	NONE	NONE
1uvx_A_cavity_1	7	4.403	0.629	5	1	0	0	1	0	Globin LI637	NONE	Q08753	Involved in oxygen binding	NONE	NONE
1u63_C_cavity_2	7	4.402	0.6289	5	0	1	1	0	0	50S ribosomal protein L1P	NONE	P54050	Translation, ribosomal structure and biogenesis	NONE	NONE
2gk9_A_cavity_2	6	3.769	0.6281	6	0	0	0	0	0	Phosphatidylinositol-5-phosphate 4-kinase type-2 gamma	NONE	Q8TBX8	NONE	NONE	NONE
1rxt_C_cavity_3	6	3.765	0.6274	4	1	1	0	0	0	Glycylpeptide N-tetradecanoyltransferase 1	NONE	P30419	NONE	NONE	NONE
1t3w_B_cavity_1	6	3.763	0.6272	5	1	0	0	0	0	DNA primase	NONE	P0ABS5	NONE	NONE	NONE
2z3x_A_cavity_1	6	3.761	0.6269	5	1	0	0	0	0	Small, acid-soluble spore protein C	NONE	P02958	NONE	NONE	NONE
2spo_A_cavity_1	6	3.76	0.6267	5	0	0	0	1	0	Myoglobin	NONE	P02185	Involved in iron ion binding	NONE	NONE
1dos_A_cavity_1	6	3.759	0.6265	4	1	0	1	0	0	Fructose-bisphosphate aldolase class 2	NONE	P0AB71	Carbohydrate transport and metabolism	NONE	NONE
2ohv_A_cavity_2	6	3.743	0.6238	2	1	1	1	1	0	Glutamate racemase	NONE	Q9A1B7	NONE	NONE	NONE
2aao_A_cavity_1	6	3.741	0.6235	6	0	0	0	0	0	Calcium-dependent protein kinase 1	NONE	Q06850	NONE	NONE	NONE
3epy_B_cavity_2	6	3.741	0.6235	6	0	0	0	0	0	Acyl-CoA-binding domain-containing protein 7	NONE	Q8N6N7	NONE	NONE	NONE
2j6y_D_cavity_1	6	3.738	0.623	5	0	1	0	0	0	Phosphoserine phosphatase rsbU	NONE	P40399	NONE	NONE	NONE
2pgh_B_cavity_1	8	4.982	0.6227	6	0	1	0	1	0	Hemoglobin subunit alpha	NONE	P01965	NONE	NONE	NONE
1rp8_A_cavity_1	8	4.975	0.6219	4	1	1	2	0	0	Alpha-amylase type A isozyme	NONE	P00693	Carbohydrate transport and metabolism	NONE	NONE
1vcn_A_cavity_1	8	4.973	0.6217	4	1	1	1	1	0	CTP synthase	NONE	Q5SIA8	NONE	NONE	NONE
2ron_A_cavity_2	7	4.35	0.6214	4	1	1	0	1	0	Surfactin synthetase thioesterase subunit	NONE	Q08788	NONE	NONE	NONE
2qnc_B_cavity_2	6	3.728	0.6213	6	0	0	0	0	0	Recombination endonuclease VII	NONE	P13340	NONE	NONE	NONE
2f66_E_cavity_1	6	3.727	0.6211	6	0	0	0	0	0	Suppressor protein STP22 of temperature-sensitive alpha-factor receptor and arginine permease	NONE	P25604	NONE	NONE	NONE
1igw_B_cavity_1	6	3.722	0.6204	5	1	0	0	0	0	Isocitrate lyase	NONE	P0A9G6	NONE	NONE	NONE
1wxr_A_cavity_2	8	4.955	0.6194	4	1	1	2	0	0	Hemoglobin-binding protease hbp	NONE	O88093	NONE	NONE	NONE
2czy_A_cavity_1	6	3.714	0.619	6	0	0	0	0	0	Paired amphipathic helix protein Sin3b	NONE	Q62141	NONE	NONE	NONE
1k1g_A_cavity_1	6	3.708	0.6179	5	0	1	0	0	0	Splicing factor 1	NONE	Q15637	NONE	NONE	NONE
2z1b_B_cavity_1	6	3.701	0.6169	5	1	0	0	0	0	Delta-aminolevulinic acid dehydratase	NONE	P10518	NONE	NONE	NONE
1p4t_A_cavity_2	6	3.699	0.6165	5	1	0	0	0	0	Surface protein A	NONE	Q9RP17	Involved in porin activity	NONE	NONE
3bfx_B_cavity_1	6	3.69	0.615	2	1	1	0	2	0	Sulfotransferase 1C2	TRANSFERASE	ST1C2_HUMAN	Catalyzes the sulfate conjugation of many drugs, xenobiotic compounds, hormones, and neurotransmitters. May be involved in the activation of carcinogenic hyroxylamines. Shows activity towards p-nitrophenol and N-hydroxy-2-acetylamino- fluorene (N-OH-2AAF)	NONE	NONE
2bjh_B_cavity_2	7	4.291	0.6129	3	1	1	0	2	0	Feruloyl esterase A	NONE	O42807	NONE	NONE	NONE
1ase_A_cavity_1	6	3.677	0.6129	5	0	1	0	0	0	Aspartate aminotransferase	NONE	P00509	Amino acid transport and metabolism	NONE	NONE
2dy3_C_cavity_1	9	5.512	0.6124	5	1	1	0	2	0	Alanine racemase	NONE	Q8RSU9	NONE	NONE	NONE
1opg_H_cavity_1	6	3.673	0.6122	5	0	0	0	1	0	Ig gamma-1 chain C region secreted form	NONE	P01868	NONE	NONE	NONE
2fy4_A_cavity_3	6	3.672	0.612	4	1	1	0	0	0	Choline O-acetyltransferase	NONE	P28329	NONE	NONE	NONE
2jul_A_cavity_2	6	3.671	0.6118	6	0	0	0	0	0	Calsenilin	NONE	Q9QXT8	NONE	NONE	NONE
1gqm_E_cavity_1	7	4.278	0.6111	6	0	1	0	0	0	Protein S100-A12	CALCIUM BINDING	S10AC_HUMAN	Calcitermin possesses antifungal activity against C.albicans and is also active against E.coli and P.aeruginosa but not L.monocytogenes and S.aureus.	NONE	NONE
1zag_D_cavity_1	6	3.667	0.6111	4	1	0	1	0	0	Zinc-alpha-2-glycoprotein	LIPID MOBILIZATION FACTOR	ZA2G_HUMAN	Stimulates lipid degradation in adipocytes and causes the extensive fat losses associated with some advanced cancers. May bind polyunsaturated fatty acids.	NONE	NONE
1wru_A_cavity_3	6	3.653	0.6089	4	0	1	1	0	0	Baseplate protein	NONE	P08558	NONE	NONE	NONE
1xvp_A_cavity_1	6	3.652	0.6087	5	0	1	0	0	0	Nuclear receptor subfamily 1 group I member 3	DNA BINDING PROTEIN	NR1I3_HUMAN	Binds and transactivates the retinoic acid response elements that control expression of the retinoic acid receptor beta 2 and alcohol dehydrogenase 3 genes. Transactivates both the phenobarbital responsive element module of the human CYP2B6 gene and the C	NONE	NONE
3dp9_C_cavity_1	6	3.639	0.6065	2	0	2	2	0	0	5-methylthioadenosine/S-adenosylhomocysteine nucleosidase	NONE	Q9KPI8	NONE	NONE	NONE
1qcb_F_cavity_1	6	3.639	0.6064	5	1	0	0	0	0	Heat-labile enterotoxin IIB, B chain	NONE	P43529	NONE	NONE	NONE
2apo_A_cavity_1	6	3.634	0.6057	4	1	0	0	1	0	Probable tRNA pseudouridine synthase B	NONE	Q57612	NONE	NONE	NONE
2e74_A_cavity_3	7	4.238	0.6054	5	1	0	0	1	0	Cytochrome b6	NONE	P83791	Involved in oxidoreductase activity	NONE	NONE
1lqs_L_cavity_2	6	3.631	0.6052	5	0	1	0	0	0	Interleukin-10 receptor alpha chain	IMMUNE SYSTEM	I10R1_HUMAN	Receptor for IL10; binds IL10 with a high affinity.	NONE	NONE
1zpu_E_cavity_2	6	3.628	0.6046	3	1	1	1	0	0	Iron transport multicopper oxidase FET3	NONE	P38993	NONE	NONE	NONE
2vlg_C_cavity_1	6	3.621	0.6035	4	0	1	0	1	0	Sporulation kinase A	NONE	P16497	NONE	NONE	NONE
3c7g_A_cavity_3	6	3.62	0.6033	4	1	0	1	0	0	Arabinoxylan arabinofuranohydrolase	NONE	Q45071	NONE	NONE	NONE
2zs0_C_cavity_1	8	4.826	0.6032	6	1	0	0	1	0	Extracellular giant hemoglobin major globin subunit A1	NONE	Q7M419	NONE	NONE	NONE
2o06_B_cavity_1	7	4.221	0.603	1	1	2	3	0	0	Spermidine synthase	NONE	P19623	Amino acid transport and metabolism	NONE	S-Adenosylmethionine (SAMe) is used as a drug in Europe for the treatment of depression, liver disorders, fibromyalgia, and osteoarthritis. It has also been introduced into the United States market as a dietary supplement for the support of bone and joint health, as well as mood and emotional well being.
2k8y_A_cavity_1	7	4.218	0.6026	6	1	0	0	0	0	Uncharacterized protein MJ0187	NONE	Q57646	NONE	NONE	NONE
2fxr_A_cavity_1	6	3.616	0.6026	3	0	2	1	0	0	Tryptase beta-2	HYDROLASE	TRYB2_HUMAN	Tryptase is the major neutral protease present in mast cells and is secreted upon the coupled activation-degranulation response of this cell type. Has an immunoprotective role during bacterial infection. Required to efficiently combat K.pneumoniae infecti	NONE	NONE
1yf2_B_cavity_6	6	3.603	0.6006	5	0	1	0	0	0	Type-1 restriction enzyme MjaXIP specificity protein	NONE	Q57594	NONE	NONE	NONE
3hbx_D_cavity_2	6	3.601	0.6001	5	0	1	0	0	0	Glutamate decarboxylase 1	NONE	Q42521	NONE	NONE	NONE
1fdy_B_cavity_2	6	3.595	0.5992	6	0	0	0	0	0	N-acetylneuraminate lyase	NONE	P0A6L4	Catalyzes the reversible aldol cleavage of N-acetylneuraminic acid (sialic acid; Neu5Ac) to form pyruvate and N-acetylmannosamine (ManNAc) via a Schiff base intermediate.	NONE	NONE
2ee4_A_cavity_1	8	4.78	0.5975	5	2	0	0	1	0	Rho GTPase-activating protein 5	NONE	Q13017	NONE	NONE	NONE
2rkj_J_cavity_1	6	3.582	0.5971	5	1	0	0	0	0	Tyrosyl-tRNA synthetase, mitochondrial	NONE	P12063	NONE	NONE	NONE
3h2z_A_cavity_1	6	3.58	0.5966	4	0	1	1	0	0	Mannitol-1-phosphate 5-dehydrogenase	NONE	Q83PQ0	NONE	NONE	NONE
3glb_C_cavity_1	6	3.578	0.5963	4	2	0	0	0	0	HTH-type transcriptional regulator catM	NONE	P07774	NONE	NONE	NONE
2g2r_B_cavity_1	6	3.576	0.596	5	0	1	0	0	0	Ig heavy chain Mem5	NONE	P84751	NONE	NONE	NONE
1ar4_B_cavity_1	6	3.575	0.5959	5	0	1	0	0	0	Superoxide dismutase [Mn/Fe]	NONE	P80293	NONE	NONE	NONE
1mg5_B_cavity_1	8	4.766	0.5958	5	1	1	1	0	0	Alcohol dehydrogenase	NONE	P00334	Involved in alcohol dehydrogenase activity	NONE	NONE
3cuo_A_cavity_1	6	3.575	0.5958	5	1	0	0	0	0	Probable HTH-type transcriptional regulator ygaV	NONE	P77295	NONE	NONE	NONE
1vap_A_cavity_1	8	4.766	0.5957	4	0	2	2	0	0	Phospholipase A2	NONE	P51972	NONE	NONE	NONE
1wdm_D_cavity_3	7	4.169	0.5955	6	0	1	0	0	0	Fatty acid oxidation complex subunit alpha	NONE	P28793	NONE	NONE	NONE
1d5b_B_cavity_1	6	3.569	0.5948	5	1	0	0	0	0	Ig kappa chain C region	NONE	P01834	NONE	NONE	NONE
2rcv_G_cavity_1	6	3.563	0.5938	4	0	1	1	0	0	Superoxide dismutase [Mn]	NONE	P54375	NONE	NONE	NONE
1tz7_A_cavity_5	6	3.56	0.5933	3	1	1	1	0	0	4-alpha-glucanotransferase	NONE	O66937	NONE	NONE	NONE
2c62_A_cavity_1	7	4.153	0.5932	5	1	0	1	0	0	Activated RNA polymerase II transcriptional coactivator p15	NONE	P53999	NONE	NONE	NONE
2p63_B_cavity_1	6	3.559	0.5931	6	0	0	0	0	0	Cell division control protein 4	NONE	P07834	NONE	NONE	NONE
1k9k_A_cavity_2	6	3.558	0.593	4	0	1	1	0	0	Protein S100-A6	SIGNALING PROTEIN	S10A6_HUMAN	NONE	NONE	NONE
1ovq_A_cavity_2	6	3.558	0.5929	4	2	0	0	0	0	Putative Holliday junction resolvase	NONE	P0A8I1	NONE	NONE	NONE
1yiv_A_cavity_1	8	4.739	0.5924	4	2	0	2	0	0	Myelin P2 protein	NONE	P0C6G6	NONE	NONE	NONE
2qv6_C_cavity_1	6	3.551	0.5918	5	1	0	0	0	0	GTP cyclohydrolase III	NONE	Q57609	NONE	NONE	NONE
3cp8_D_cavity_3	7	4.136	0.5908	3	1	1	2	0	0	tRNA uridine 5-carboxymethylaminomethyl modification enzyme mnmG	NONE	Q8KA85	NONE	NONE	NONE
2a98_A_cavity_2	8	4.725	0.5907	4	0	2	2	0	0	Inositol-trisphosphate 3-kinase C	NONE	Q96DU7	NONE	NONE	NONE
1wh0_A_cavity_1	6	3.543	0.5904	4	0	1	0	1	0	Ubiquitin carboxyl-terminal hydrolase 19	HYDROLASE	UBP19_HUMAN	Involved in the ubiquitin-dependent proteolytic pathway in conjunction with the 26S proteasome (By similarity).	NONE	NONE
3epm_B_cavity_2	6	3.541	0.5902	4	1	0	1	0	0	Thiamine biosynthesis protein thiC	NONE	Q9A6Q5	NONE	NONE	NONE
2pbe_A_cavity_1	6	3.54	0.59	3	1	1	1	0	0	Aminoglycoside 6-adenylyltransferase	NONE	P17585	NONE	NONE	NONE
2a5m_A_cavity_1	6	3.536	0.5894	3	0	2	0	1	0	Beta-crystallin S	NONE	O35486	NONE	NONE	NONE
1gk9_B_cavity_7	7	4.125	0.5892	4	1	1	0	1	0	Penicillin G acylase	NONE	P06875	NONE	NONE	NONE
1pkq_G_cavity_1	7	4.124	0.5891	5	0	1	0	1	0	Myelin-oligodendrocyte glycoprotein	NONE	Q63345	NONE	NONE	NONE
2a7s_A_cavity_3	6	3.531	0.5885	6	0	0	0	0	0	Probable propionyl-CoA carboxylase beta chain 5	NONE	P96885	NONE	NONE	NONE
2hz7_A_cavity_2	6	3.531	0.5885	4	1	1	0	0	0	Glutaminyl-tRNA synthetase	NONE	P56926	NONE	NONE	NONE
2ysw_C_cavity_1	8	4.705	0.5881	4	2	0	1	1	0	3-dehydroquinate dehydratase	NONE	O66440	NONE	NONE	NONE
1to6_A_cavity_3	6	3.527	0.5878	6	0	0	0	0	0	Glycerate kinase	NONE	P57098	NONE	NONE	NONE
1njf_D_cavity_1	6	3.526	0.5877	3	2	0	1	0	0	DNA polymerase III subunit tau	NONE	P06710	Involved in nucleotide binding	NONE	NONE
2zme_A_cavity_1	6	3.524	0.5874	5	1	0	0	0	0	Vacuolar-sorting protein SNF8	NONE	Q96H20	NONE	NONE	NONE
3fku_T_cavity_1	6	3.521	0.5869	5	1	0	0	0	0	Hemagglutinin	NONE	Q6J8F6	NONE	NONE	NONE
1yvw_A_cavity_1	6	3.521	0.5868	6	0	0	0	0	0	Phosphoribosyl-ATP pyrophosphatase	NONE	Q81G00	NONE	NONE	NONE
2hcb_B_cavity_2	7	4.106	0.5866	4	0	2	0	1	0	Chromosomal replication initiator protein dnaA	NONE	O66659	Involved in nucleotide binding	NONE	NONE
2csj_A_cavity_1	7	4.101	0.5859	4	1	1	1	0	0	Tight junction protein ZO-2	NONE	Q9Z0U1	NONE	NONE	NONE
1ya0_B_cavity_2	7	4.094	0.5849	5	1	1	0	0	0	Protein SMG7	NONE	Q92540	NONE	NONE	NONE
1f0o_A_cavity_1	6	3.509	0.5848	5	0	1	0	0	0	Type-2 restriction enzyme PvuII	NONE	P23657	NONE	NONE	NONE
2ew1_A_cavity_3	6	3.508	0.5847	4	1	1	0	0	0	Ras-related protein Rab-30	SIGNALING PROTEIN	RAB30_HUMAN	NONE	NONE	NONE
1qgk_A_cavity_7	6	3.508	0.5847	4	1	1	0	0	0	Importin subunit beta-1	NONE	Q14974	NONE	NONE	NONE
2k8f_A_cavity_1	6	3.497	0.5828	5	0	1	0	0	0	Histone acetyltransferase p300	NONE	Q09472	NONE	NONE	NONE
1msw_D_cavity_4	6	3.496	0.5826	5	0	1	0	0	0	DNA-directed RNA polymerase	NONE	P00573	NONE	NONE	NONE
1s0w_D_cavity_1	6	3.495	0.5825	3	1	1	1	0	0	Beta-lactamase TEM	NONE	P62594	Defense mechanisms and antibioitic degradation	NONE	NONE
3brp_A_cavity_2	7	4.077	0.5824	4	0	2	1	0	0	C-phycocyanin alpha chain	NONE	P00306	NONE	NONE	NONE
1a57_A_cavity_1	9	5.24	0.5822	5	1	1	2	0	0	Fatty acid-binding protein, intestinal	NONE	P02693	Involved in transporter activity	NONE	NONE
3bxj_A_cavity_2	7	4.076	0.5822	4	2	0	1	0	0	Ras GTPase-activating protein SynGAP	NONE	Q9QUH6	NONE	NONE	NONE
1b4u_B_cavity_1	6	3.493	0.5821	4	0	1	0	1	0	Protocatechuate 4,5-dioxygenase alpha chain	NONE	P22635	NONE	NONE	NONE
2hvb_A_cavity_1	6	3.489	0.5815	4	0	1	1	0	0	Superoxide reductase	NONE	O58810	NONE	NONE	NONE
2qbv_A_cavity_1	6	3.488	0.5813	5	0	1	0	0	0	Uncharacterized protein Rv0948c/MT0975	NONE	P64767	NONE	NONE	NONE
3dwl_D_cavity_1	7	4.062	0.5803	6	0	0	0	1	0	Actin-related protein 3	NONE	P32390	NONE	NONE	NONE
1rso_A_cavity_1	6	3.474	0.5791	5	1	0	0	0	0	Disks large homolog 1	NONE	Q62696	NONE	NONE	NONE
1gtt_C_cavity_2	8	4.632	0.579	3	1	2	2	0	0	Homoprotocatechuate catabolism bifunctional isomerase/decarboxylase	NONE	P37352	NONE	NONE	NONE
1lln_A_cavity_1	7	4.052	0.5789	4	1	1	1	0	0	Antiviral protein 2	NONE	Q40772	NONE	NONE	NONE
1m3s_A_cavity_1	7	4.048	0.5784	4	1	1	0	1	0	3-hexulose-6-phosphate isomerase	NONE	P42404	NONE	NONE	NONE
1y64_B_cavity_2	8	4.62	0.5775	6	1	0	0	1	0	Actin, alpha skeletal muscle	NONE	P68135	NONE	NONE	NONE
1sgm_B_cavity_1	6	3.459	0.5765	4	1	0	1	0	0	Uncharacterized HTH-type transcriptional regulator yxaF	NONE	P42105	NONE	NONE	NONE
1yi5_I_cavity_1	7	4.033	0.5762	5	0	1	1	0	0	Acetylcholine-binding protein	NONE	P58154	Involved in extracellular ligand-gated ion channel activity	NONE	For the relief of nicotine withdrawal symptoms and as an aid to smoking cessation.
1v1f_A_cavity_1	6	3.455	0.5759	5	1	0	0	0	0	Calcineurin B-like protein 4	NONE	O81223	Involved in calcium ion binding	NONE	NONE
2fyn_M_cavity_1	7	4.029	0.5756	7	0	0	0	0	0	Cytochrome b	NONE	Q02761	NONE	NONE	NONE
3ech_C_cavity_1	6	3.453	0.5756	4	0	0	0	2	0	Multidrug resistance operon repressor	NONE	P52003	NONE	NONE	NONE
1vmd_B_cavity_1	7	4.023	0.5748	4	1	1	0	1	0	Methylglyoxal synthase	NONE	Q9X0R7	NONE	NONE	NONE
3b68_A_cavity_1	7	4.021	0.5745	5	0	1	0	1	0	Androgen receptor	TRANSCRIPTION	ANDR_HUMAN	Steroid hormone receptors are ligand-activated transcription factors that regulate eukaryotic gene expression and affect cellular proliferation and differentiation in target tissues. Transcription factor activity is modulated by bound coactivator and core	Genetic variation in AR can be responsible of androgenetic alopecia (AGA) [MIM:109200].;Defects in AR are the cause of androgen insensibility syndrome (AIS) [MIM:300068]; previously known as testicular feminization syndrome (TFM). It can be complete (CAIS) when external genitalia are phenotypically female; or partial (PAIS) when external genitalia are substantively ambiguous or mild (MAIS) when e…	Hypoactive sexual desire disorder;Hepatitis B virus infection;Cardiac failure;Andrology;Hirsutism;Female sexual dysfunction;Psoriasis;Reperfusion injury;Plasmodium infection;Atherosclerosis;Prostate hyperplasia;Fatigue;Male sexual dysfunction;Autoimmune disease;Testosterone deficiency;Uterine fibroids;Metabolic disorder;Myalgia;Obesity;Gynecological disorder;Contraception;Cancer;Hypercholesterole…
2ka5_A_cavity_1	6	3.445	0.5741	4	0	1	0	1	0	Putative anti-sigma factor antagonist TM_1081	NONE	Q9X0H0	NONE	NONE	NONE
1s9c_F_cavity_3	6	3.442	0.5736	5	0	0	1	0	0	Peroxisomal multifunctional enzyme type 2	NONE	P51659	Lipid transport and metabolism	NONE	Some evidence suggests that NADH might be useful in treating Parkinsons disease, chronic fatigue syndrome, Alzheimers disease and cardiovascular disease.
2dme_A_cavity_1	6	3.441	0.5736	3	1	1	0	1	0	PHD finger protein 3	NONE	Q92576	NONE	NONE	NONE
2lh5_A_cavity_1	8	4.588	0.5735	6	1	0	0	1	0	Leghemoglobin-2	NONE	P02240	Cell motility	NONE	NONE
2rmr_A_cavity_1	6	3.44	0.5734	5	1	0	0	0	0	Paired amphipathic helix protein Sin3a	NONE	Q60520	NONE	NONE	NONE
1hj1_A_cavity_1	6	3.44	0.5733	4	1	0	1	0	0	Estrogen receptor beta	NONE	Q62986	Involved in transcription factor activity	NONE	NONE
2ikq_A_cavity_4	6	3.434	0.5724	3	1	1	1	0	0	Ubiquitin-associated and SH3 domain-containing protein B	NONE	Q8BGG7	NONE	NONE	NONE
3b3d_A_cavity_1	6	3.432	0.572	2	2	0	0	2	0	Uncharacterized oxidoreductase ytbE	NONE	O34678	NONE	NONE	NONE
1ql6_A_cavity_3	6	3.43	0.5717	3	1	1	1	0	0	Phosphorylase b kinase gamma catalytic chain, skeletal muscle isoform	NONE	P00518	NONE	NONE	NONE
2qvv_A_cavity_1	7	4.001	0.5716	4	1	1	0	1	0	Fructose-1,6-bisphosphatase 1	NONE	P00636	Carbohydrate transport and metabolism	NONE	NONE
1q8b_A_cavity_1	7	4	0.5714	4	0	1	1	1	0	Uncharacterized protein yjcS	NONE	O31641	NONE	NONE	NONE
1bh9_B_cavity_1	6	3.429	0.5714	6	0	0	0	0	0	Transcription initiation factor TFIID subunit 13	NONE	Q15543	NONE	NONE	NONE
2fg5_A_cavity_1	6	3.427	0.5711	2	2	1	1	0	0	Ras-related protein Rab-31	SIGNALING PROTEIN	RAB31_HUMAN	NONE	NONE	NONE
1lss_B_cavity_1	7	3.995	0.5707	7	0	0	0	0	0	Trk system potassium uptake protein trkA homolog	NONE	Q58505	Involved in cation transmembrane transporter activity	NONE	NONE
2j47_A_cavity_1	7	3.994	0.5705	3	1	1	0	2	0	O-GlcNAcase BT_4395	NONE	Q89ZI2	NONE	NONE	NONE
1jh6_A_cavity_1	11	6.272	0.5702	5	1	2	0	3	0	Cyclic phosphodiesterase	NONE	O04147	Involved in cyclic-nucleotide phosphodiesterase activity	NONE	NONE
1l7b_A_cavity_1	7	3.986	0.5695	5	0	1	1	0	0	DNA ligase	NONE	P26996	NONE	NONE	NONE
2qtv_A_cavity_6	7	3.981	0.5688	3	1	1	0	2	0	Protein transport protein SEC23	NONE	P15303	NONE	NONE	NONE
3eay_A_cavity_1	7	3.973	0.5676	3	1	1	0	2	0	Sentrin-specific protease 7	HYDROLASE	SENP7_HUMAN	Protease that deconjugates SUMO2 and SUMO3 from targeted proteins, but not SUMO1. Catalyzes the deconjugation of poly-SUMO2 and poly-SUMO3 chains. Has very low efficiency in processing full- length SUMO proteins to their mature forms.	NONE	NONE
2cxq_A_cavity_2	7	3.972	0.5674	4	1	1	1	0	0	Glucose-6-phosphate isomerase	NONE	P06745	Carbohydrate transport and metabolism	NONE	NONE
1asq_A_cavity_3	7	3.971	0.5673	3	0	2	1	1	0	L-ascorbate oxidase	NONE	P37064	NONE	NONE	NONE
2bsk_D_cavity_1	8	4.533	0.5666	5	0	1	0	2	0	Mitochondrial import inner membrane translocase subunit Tim9	NONE	Q9Y5J7	NONE	NONE	NONE
1nba_A_cavity_2	8	4.531	0.5664	5	1	1	1	0	0	N-carbamoylsarcosine amidase	NONE	P32400	NONE	NONE	NONE
2pp4_A_cavity_1	8	4.527	0.5659	6	1	1	0	0	0	Protein CBFA2T1	TRANSCRIPTION	MTG8_HUMAN	Transcription regulator that excerts its function by binding to histone deacetylases and transcription factors. Can repress transactivation mediated by TCF12.	A chromosomal aberration involving RUNX1T1 is a cause of acute myeloid leukemia (AML-M2). Translocation t(8;21)(q22;q22) with RUNX1/AML1.;Defects in RUNX1T1 may be a cause of colorectal cancer (CRC) [MIM:114500].	NONE
1ith_B_cavity_1	8	4.525	0.5656	6	1	0	0	1	0	Hemoglobin F-I	NONE	P06148	NONE	NONE	NONE
1rym_A_cavity_1	8	4.521	0.5651	6	1	0	0	1	0	Chloroplastic group IIB intron splicing facilitator CRS2, chloroplastic	NONE	Q9M5P4	NONE	NONE	NONE
2amj_A_cavity_1	8	4.521	0.5651	5	1	2	0	0	0	Modulator of drug activity B	NONE	P0AEY7	NONE	NONE	NONE
1ll0_A_cavity_1	7	3.954	0.5648	6	1	0	0	0	0	Glycogenin-1	NONE	P13280	Involved in transferase activity, transferring hexosyl groups	NONE	NONE
1gl9_B_cavity_6	7	3.946	0.5637	4	0	2	1	0	0	Reverse gyrase	NONE	O29238	Involved in nucleic acid binding	NONE	NONE
1un8_A_cavity_4	7	3.943	0.5633	3	0	2	2	0	0	Dihydroxyacetone kinase	NONE	P45510	Carbohydrate transport and metabolism	NONE	NONE
2hh8_A_cavity_1	7	3.942	0.5631	3	1	1	1	1	0	Uncharacterized protein ydfO	NONE	P76156	NONE	NONE	NONE
2vag_A_cavity_1	7	3.935	0.5621	3	0	2	2	0	0	Dual specificity protein kinase CLK1	TRANSFERASE	CLK1_HUMAN	Phosphorylates serine- and arginine-rich (SR) proteins of the spliceosomal complex may be a constituent of a network of regulatory mechanisms that enable SR proteins to control RNA splicing. Phosphorylates serines, threonines and tyrosines (By similarity)	NONE	Toxicity;Metabolic disorder;Neurodegenerative disease;Cancer;Cardiovascular disease
3e1k_I_cavity_3	7	3.934	0.562	4	1	1	1	0	0	Galactose/lactose metabolism regulatory protein GAL80	NONE	Q06433	NONE	NONE	NONE
1v5w_B_cavity_1	7	3.931	0.5615	4	0	1	2	0	0	Meiotic recombination protein DMC1/LIM15 homolog	NONE	Q14565	NONE	NONE	NONE
1vi1_B_cavity_2	7	3.901	0.5573	5	0	1	1	0	0	Fatty acid/phospholipid synthesis protein plsX	NONE	P71018	NONE	NONE	NONE
2iuk_B_cavity_1	7	3.9	0.5571	5	1	0	1	0	0	Seed lipoxygenase	NONE	P24095	NONE	NONE	NONE
2ch5_A_cavity_1	7	3.872	0.5531	4	0	2	1	0	0	N-acetyl-D-glucosamine kinase	NONE	Q9UJ70	NONE	NONE	NONE
1tvm_A_cavity_1	7	3.87	0.5529	7	0	0	0	0	0	Galactitol-specific phosphotransferase enzyme IIB component	NONE	P0A436	NONE	NONE	NONE
3c5k_A_cavity_1	7	3.867	0.5524	4	1	1	1	0	0	Histone deacetylase 6	HYDROLASE	HDAC6_HUMAN	Responsible for the deacetylation of lysine residues on the N-terminal part of the core histones (H2A, H2B, H3 and H4). Histone deacetylation gives a tag for epigenetic repression and plays an important role in transcriptional regulation, cell cycle progr	NONE	NONE
1sq1_A_cavity_3	7	3.866	0.5522	4	1	1	1	0	0	Chorismate synthase	NONE	Q9PM41	NONE	NONE	NONE
1j3x_A_cavity_2	7	3.865	0.5521	3	2	0	0	2	0	High mobility group protein B2	NONE	P17741	NONE	NONE	NONE
1ega_B_cavity_1	7	3.864	0.552	4	1	1	0	1	0	GTP-binding protein era	NONE	P06616	NONE	NONE	NONE
1bs2_A_cavity_3	7	3.851	0.5501	6	1	0	0	0	0	Arginyl-tRNA synthetase, cytoplasmic	NONE	Q05506	NONE	NONE	NONE
1n8w_A_cavity_3	7	3.849	0.5499	6	1	0	0	0	0	Malate synthase G	NONE	P0A5J4	Energy production and conversion	NONE	NONE
1xpo_B_cavity_3	7	3.847	0.5496	3	2	0	2	0	0	Transcription termination factor rho	NONE	P0AG30	Facilitates transcription termination by a mechanism that involves Rho binding to the nascent RNA, activation of Rho's RNA-dependent ATPase activity, and release of the mRNA from the DNA template. RNA-dependent NTPase which utilizes all four ribonucleoside triphosphates as substrates.	NONE	NONE
1aj8_A_cavity_2	7	3.847	0.5496	5	1	1	0	0	0	Citrate synthase	NONE	Q53554	Involved in transferase activity, transferring acyl groups, acyl groups converted into alkyl on transfer	NONE	NONE
1h97_B_cavity_1	9	4.943	0.5493	7	0	1	0	1	0	Globin-3	NONE	P80721	Involved in iron ion binding	NONE	NONE
1lns_A_cavity_2	7	3.841	0.5487	3	0	2	1	1	0	Xaa-Pro dipeptidyl-peptidase	NONE	P22346	NONE	NONE	NONE
1oi8_B_cavity_2	7	3.837	0.5482	4	1	1	1	0	0	Protein ushA	NONE	P07024	Involved in hydrolase activity	NONE	NONE
2vwt_A_cavity_1	9	4.932	0.548	6	2	0	0	1	0	2-keto-3-deoxy-L-rhamnonate aldolase	NONE	P76469	NONE	NONE	NONE
2rmp_A_cavity_2	7	3.827	0.5467	5	0	1	1	0	0	Mucorpepsin	NONE	P00799	Involved in aspartic-type endopeptidase activity	NONE	NONE
2vdg_A_cavity_1	7	3.826	0.5466	4	2	0	0	1	0	Aldose reductase	NONE	P23901	NONE	NONE	NONE
2i3q_A_cavity_1	7	3.825	0.5464	3	1	1	0	2	0	DNA endonuclease I-CreI	NONE	P05725	NONE	NONE	NONE
1f0n_A_cavity_1	9	4.913	0.5459	6	2	0	0	1	0	Antigen 85-B	NONE	P0C5B9	NONE	NONE	NONE
1j7x_A_cavity_3	7	3.821	0.5459	4	1	1	1	0	0	Retinol-binding protein 3	NONE	Q7SZI7	NONE	NONE	NONE
2hzp_A_cavity_2	7	3.819	0.5456	4	0	2	0	1	0	Kynureninase	NONE	Q16719	NONE	NONE	NONE
1lnm_A_cavity_2	7	3.816	0.5451	5	0	1	0	1	0	Bilin-binding protein	LIGAND BINDING PROTEIN	BBP_PIEBR	This protein binds the blue pigments bilins.	NONE	NONE
2oyn_A_cavity_2	7	3.814	0.5448	4	1	1	1	0	0	Riboflavin kinase	NONE	Q60365	NONE	NONE	NONE
2bcg_G_cavity_1	7	3.81	0.5443	7	0	0	0	0	0	Rab GDP-dissociation inhibitor	NONE	P39958	NONE	NONE	NONE
2d3o_1_cavity_2	8	4.35	0.5438	7	1	0	0	0	0	Trigger factor	NONE	Q9RT21	NONE	NONE	NONE
3h7f_B_cavity_3	7	3.8	0.5428	4	1	1	0	1	0	Serine hydroxymethyltransferase 1	NONE	O53441	NONE	NONE	NONE
2kd2_A_cavity_1	7	3.791	0.5416	6	1	0	0	0	0	Fas apoptotic inhibitory molecule 1	NONE	Q9WUD8	NONE	NONE	NONE
1k1d_A_cavity_2	7	3.786	0.5408	3	1	1	1	1	0	D-hydantoinase	NONE	Q45515	Nucleotide transport and metabolism	NONE	NONE
1c0l_A_cavity_2	7	3.783	0.5404	6	1	0	0	0	0	D-amino-acid oxidase	NONE	P80324	Amino acid transport and metabolism	NONE	NONE
1bq6_A_cavity_2	7	3.776	0.5395	4	1	1	0	1	0	Chalcone synthase 2	NONE	P30074	Secondary metabolites biosynthesis, transport and catabolism	NONE	NONE
2a2f_X_cavity_3	8	4.314	0.5392	4	1	1	0	2	0	Exocyst complex component 6	NONE	Q9VDE6	NONE	NONE	NONE
1fok_A_cavity_1	7	3.77	0.5385	3	1	0	1	2	0	Type-2 restriction enzyme FokI	NONE	P14870	NONE	NONE	NONE
2zcu_A_cavity_2	7	3.769	0.5384	5	0	1	1	0	0	Uncharacterized oxidoreductase ytfG	NONE	P39315	NONE	NONE	NONE
1j9a_A_cavity_3	7	3.765	0.5378	5	1	1	0	0	0	Oligoribonuclease	NONE	P45340	NONE	NONE	NONE
1iau_A_cavity_1	7	3.764	0.5376	4	1	1	0	1	0	Granzyme B	HYDROLASE	GRAB_HUMAN	This enzyme is necessary for target cell lysis in cell- mediated immune responses. It cleaves after Asp. Seems to be linked to an activation cascade of caspases (aspartate-specific cysteine proteases) responsible for apoptosis execution. Cleaves caspase-3	NONE	Autoimmune disease;Cancer
1jqx_A_cavity_1	7	3.763	0.5376	5	2	0	0	0	0	Dihydroorotate dehydrogenase A	NONE	Q53ZE5	Nucleotide transport and metabolism	NONE	NONE
2bdr_B_cavity_1	7	3.762	0.5374	6	0	1	0	0	0	Ureidoglycolate hydrolase	NONE	P59285	NONE	NONE	NONE
1w6j_A_cavity_4	7	3.76	0.5371	6	0	1	0	0	0	Lanosterol synthase	ISOMERASE	ERG7_HUMAN	Catalyzes the cyclization of (S)-2,3 oxidosqualene to lanosterol, a reaction that forms the sterol nucleus.	NONE	Hyperlipidemia;Hypercholesterolemia;Atherosclerosis
1z45_A_cavity_4	7	3.759	0.537	3	0	2	2	0	0	GAL10 bifunctional protein [Includes: UDP-glucose 4-epimerase	NONE	P04397	Cell wall/membrane/envelope biogenesis	NONE	NONE
3bom_B_cavity_1	7	3.757	0.5367	6	0	0	0	1	0	Hemoglobin subunit alpha-4	NONE	P14527	NONE	NONE	NONE
3b46_B_cavity_2	8	4.289	0.5361	4	2	0	2	0	0	Probable kynurenine--oxoglutarate transaminase BNA3	NONE	P47039	NONE	NONE	NONE
2r55_A_cavity_1	7	3.752	0.536	4	1	1	1	0	0	StAR-related lipid transfer protein 5	NONE	Q9NSY2	NONE	NONE	NONE
1z5l_C_cavity_1	9	4.821	0.5356	5	1	1	0	2	0	T-cell surface glycoprotein CD1d1	NONE	P11609	Not known	NONE	NONE
2dn0_A_cavity_1	10	5.355	0.5355	7	2	1	0	0	0	Zinc fingers and homeoboxes protein 3	NONE	Q9H4I2	NONE	NONE	NONE
3e7g_A_cavity_1	7	3.747	0.5353	5	1	1	0	0	0	Nitric oxide synthase, inducible	NONE	P35228	Inorganic ion transport and metabolism	NONE	Used for nutritional supplementation, also for treating dietary shortage or imbalance.
1bqb_A_cavity_1	8	4.275	0.5344	4	0	2	1	1	0	Zinc metalloproteinase aureolysin	NONE	P81177	NONE	NONE	NONE
3el6_A_cavity_1	7	3.741	0.5344	5	2	0	0	0	0	Erythronolide synthase, modules 3 and 4	NONE	Q03132	NONE	NONE	NONE
1zrt_C_cavity_4	7	3.74	0.5342	6	1	0	0	0	0	Ubiquinol-cytochrome c reductase iron-sulfur subunit	NONE	P08500	NONE	NONE	NONE
2dtg_C_cavity_1	7	3.738	0.534	6	1	0	0	0	0	Insulin receptor	HORMONE RECEPTOR/IMMUNE SYSTEM	INSR_HUMAN	This receptor binds insulin and has a tyrosine-protein kinase activity. Isoform Short has a higher affinity for insulin. Mediates the metabolic functions of insulin. Binding to insulin stimulates association of the receptor with downstream mediators inclu	Defects in INSR are the cause of insulin resistance (Ins resistance) [MIM:125853].;Defects in INSR are the cause of Rabson-Mendenhall syndrome [MIM:262190]; also known as Mendenhall syndrome. It is a severe insulin resistance syndrome characterized by insulin- resistant diabetes mellitus with pineal hyperplasia and somatic abnormalities. Typical features include coarse, senile-appearing facies, d…	Insulin dependent diabetes;Cancer;Non-insulin dependent diabetes;Infection;Parkinsons disease;Hypertension;Diabetes mellitus;Hyperinsulinemia
1jtb_A_cavity_1	7	3.735	0.5335	6	0	1	0	0	0	Nonspecific lipid-transfer protein 1	NONE	P07597	Involved in lipid binding	NONE	NONE
3fz7_F_cavity_2	7	3.733	0.5334	5	0	1	1	0	0	Glutamate decarboxylase beta	NONE	P69910	NONE	NONE	NONE
1dml_E_cavity_1	8	4.267	0.5333	5	0	2	0	1	0	DNA polymerase processivity factor	NONE	P10226	NONE	NONE	NONE
1me7_A_cavity_4	7	3.732	0.5332	5	1	1	0	0	0	Inosine-5-monophosphate dehydrogenase	NONE	P50097	Nucleotide transport and metabolism	NONE	For the prophylaxis of organ rejection in patients receiving allogeneic renal transplants, administered in combination with cyclosporine and corticosteroids.
2cst_B_cavity_1	7	3.732	0.5331	5	1	0	1	0	0	Aspartate aminotransferase, cytoplasmic	NONE	P00504	Involved in transferase activity, transferring nitrogenous groups	NONE	NONE
1js6_B_cavity_2	7	3.729	0.5327	7	0	0	0	0	0	Aromatic-L-amino-acid decarboxylase	NONE	P80041	Catalyzes the decarboxylation of L-3,4-dihydroxyphenylalanine (DOPA) to dopamine, L-5-hydroxytryptophan to serotonin and L-tryptophan to tryptamine.	NONE	NONE
1ntg_D_cavity_1	7	3.727	0.5325	4	0	2	1	0	0	Tyrosyl-tRNA synthetase, cytoplasmic	NONE	P54577	Translation, ribosomal structure and biogenesis	NONE	Tyrosine is claimed to act as an effective antidepressant, however results are mixed. Tyrosine has also been claimed to reduce stress and combat narcolepsy and chronic fatigue, however these claims have been refuted by some studies.
1b0n_B_cavity_1	7	3.727	0.5324	6	1	0	0	0	0	HTH-type transcriptional regulator sinR	NONE	P06533	NONE	NONE	NONE
3csk_A_cavity_5	7	3.72	0.5314	3	0	2	1	1	0	Probable dipeptidyl-peptidase 3	NONE	Q08225	NONE	NONE	NONE
2ziv_B_cavity_1	7	3.717	0.531	5	0	2	0	0	0	Crossover junction endonuclease MUS81	NONE	Q7SXA9	NONE	NONE	NONE
2frx_A_cavity_3	7	3.711	0.5302	3	1	1	0	2	0	Ribosomal RNA small subunit methyltransferase F	NONE	P76273	NONE	NONE	NONE
2eec_A_cavity_1	8	4.241	0.5301	6	1	1	0	0	0	Filamin-B	NONE	O75369	NONE	NONE	NONE
1n60_B_cavity_2	7	3.71	0.5301	5	2	0	0	0	0	Carbon monoxide dehydrogenase small chain	NONE	P19921	NONE	NONE	NONE
1vc4_B_cavity_2	8	4.24	0.53	4	1	1	1	1	0	Indole-3-glycerol phosphate synthase	NONE	P84126	Involved in indole-3-glycerol-phosphate synthase activity	NONE	NONE
2vv5_F_cavity_2	7	3.71	0.53	6	1	0	0	0	0	Small-conductance mechanosensitive channel	MEMBRANE PROTEIN	MSCS_ECOLI	Mechanosensitive channel that participates in the regulation of osmotic pressure changes within the cell, opening in response to stretch forces in the membrane lipid bilayer, without the need for other proteins. Forms an ion channel of 1.0 nanosiemens con;The channel pore is formed by TM3 and the loop between TM2 and TM3. After a sharp turn at Gly-113, an alpha-helix (residues 114-127) is oriente…	NONE	NONE
1nsl_B_cavity_1	7	3.707	0.5296	5	1	1	0	0	0	Putative ribosomal N-acetyltransferase ydaF	NONE	P96579	NONE	NONE	NONE
1njq_A_cavity_1	7	3.707	0.5296	5	0	2	0	0	0	Transcriptional regulator SUPERMAN	NONE	Q38895	NONE	NONE	NONE
2qvl_A_cavity_1	7	3.706	0.5294	6	1	0	0	0	0	Diacylglycerol kinase	NONE	Q6GFF9	NONE	NONE	NONE
3prc_M_cavity_6	7	3.701	0.5286	5	2	0	0	0	0	Photosynthetic reaction center cytochrome c subunit	NONE	P07173	NONE	NONE	NONE
2ywh_A_cavity_2	9	4.756	0.5284	5	1	1	2	0	0	GTP-binding protein lepA	NONE	O67618	NONE	NONE	NONE
1x9f_I_cavity_1	9	4.754	0.5282	6	1	0	0	2	0	Extracellular globin-4	NONE	P13579	NONE	NONE	NONE
1wf0_A_cavity_1	7	3.696	0.528	6	0	1	0	0	0	TAR DNA-binding protein 43	NONE	Q13148	NONE	NONE	NONE
3gan_A_cavity_1	7	3.695	0.5278	5	0	2	0	0	0	Uncharacterized protein At3g22680	NONE	Q9LUJ3	NONE	NONE	NONE
2w7n_B_cavity_1	7	3.694	0.5278	4	0	2	0	1	0	TrfB transcriptional repressor protein	NONE	P03052	NONE	NONE	NONE
2ii4_B_cavity_2	7	3.692	0.5274	5	2	0	0	0	0	Lipoamide acyltransferase component of branched-chain alpha-keto acid dehydrogenase complex, mitochondrial	NONE	P11181	NONE	NONE	NONE
1vd3_A_cavity_1	8	4.219	0.5273	3	1	2	1	1	0	RNase NGR3	NONE	Q9SSV1	Involved in RNA binding	NONE	NONE
2j8w_A_cavity_1	9	4.744	0.5272	5	1	1	0	2	0	Cytochrome c	NONE	P00142	NONE	NONE	NONE
2vof_C_cavity_1	7	3.684	0.5263	6	0	1	0	0	0	Bcl-2-related protein A1	NONE	Q07440	NONE	NONE	NONE
2om5_A_cavity_2	7	3.683	0.5262	3	1	1	2	0	0	Contactin-2	NONE	Q02246	NONE	NONE	NONE
2jgd_A_cavity_8	7	3.679	0.5256	4	0	2	0	1	0	2-oxoglutarate dehydrogenase E1 component	NONE	P0AFG3	NONE	NONE	NONE
2ipc_D_cavity_4	7	3.674	0.5249	1	0	3	3	0	0	Protein translocase subunit secA	NONE	Q5SIW3	NONE	NONE	NONE
2o7c_A_cavity_4	7	3.671	0.5245	2	2	1	1	1	0	Methionine gamma-lyase	NONE	P13254	Involved in pyridoxal phosphate binding	NONE	NONE
2qc3_A_cavity_1	9	4.72	0.5244	4	2	1	0	2	0	Malonyl CoA-acyl carrier protein transacylase	NONE	P63458	NONE	NONE	NONE
1ouu_B_cavity_1	8	4.195	0.5244	5	0	1	0	2	0	Hemoglobin subunit alpha-1	NONE	P02019	NONE	NONE	NONE
