# Supplementary material for: Network Pharmacology-Based Prediction and Verification of the Targets and Mechanism for Panax Notoginseng Saponins against Coronary Heart Disease
Source: Evid Based Complement Alternat Med. 2019 Jul 3;2019:6503752. doi: 10.1155/2019/6503752 (PMC6636530; doi:10.1155/2019/6503752)
Supplement: Supplementary Materials — The supplementary materials contain 5 files which are the top 300 potential targets of each compound predicted from Pharmmapper Server. [file 6503752.f1.zip › 6503752.f1/Ginsenoside Re.csv]

Ligand: MOL005338
Pharma Model	Num Feature	Fit	Norm Fit	Num Hydrophobic	Num HB Acceptor	Num HB Donor	Num Positive	Num Negative	Num Aromatic	Name	Class	Uniplot	Function	Disease	Idication
1sse_B_cavity_1	4	4	1	4	0	0	0	0	0	AP-1-like transcription factor YAP1	NONE	P19880	NONE	NONE	NONE
3h4p_J_cavity_3	4	4	1	4	0	0	0	0	0	NONE	NONE	NONE	NONE	NONE	NONE
2v0v_B_cavity_1	4	4	1	4	0	0	0	0	0	Nuclear receptor subfamily 1 group D member 2	NONE	Q14995	NONE	NONE	NONE
1r1t_B_cavity_1	4	3.982	0.9955	4	0	0	0	0	0	Transcriptional repressor smtB	NONE	P30340	NONE	NONE	NONE
1mkm_A_cavity_2	4	3.966	0.9915	4	0	0	0	0	0	Transcriptional regulator, IclR family	NONE	Q9WXS0	Involved in DNA binding	NONE	NONE
2aj7_B_cavity_2	4	3.961	0.9903	4	0	0	0	0	0	Flagellar assembly factor fliW	NONE	Q9K6V7	NONE	NONE	NONE
1f81_A_cavity_1	4	3.867	0.9668	4	0	0	0	0	0	CREB-binding protein	NONE	P45481	NONE	NONE	NONE
1wvc_A_cavity_2	4	3.847	0.9619	4	0	0	0	0	0	Glucose-1-phosphate cytidylyltransferase	NONE	P26396	Involved in nucleotidyltransferase activity	NONE	NONE
2yxr_A_cavity_7	4	3.845	0.9612	4	0	0	0	0	0	Preprotein translocase subunit secY	NONE	Q60175	NONE	NONE	NONE
2e02_A_cavity_5	4	3.841	0.9601	4	0	0	0	0	0	Cysteine proteinase 1, mitochondrial	NONE	Q01532	NONE	NONE	NONE
2f8n_G_cavity_1	5	4.205	0.8409	5	0	0	0	0	0	Histone H3.2	NONE	P84233	NONE	NONE	NONE
1ggt_A_cavity_2	5	4.185	0.8371	4	1	0	0	0	0	Coagulation factor XIII A chain	BLOOD COAGULATION	F13A_HUMAN	Factor XIII is activated by thrombin and calcium ion to a transglutaminase that catalyzes the formation of gamma-glutamyl- epsilon-lysine cross-links between fibrin chains, thus stabilizing the fibrin clot. Also cross-link alpha-2-plasmin inhibitor, or fi	Defects in F13A1 are the cause of F13A deficiency [MIM:134570]. F13A deficiency is an autosomal recessive disorder characterized by a life-long bleeding tendency, impaired wound healing and spontaneous abortion in affected women. In addition to the common presentation such as subcutaneous and intramuscular haematomas, severe bleeding such as intracranial hemorrhages may occur.	NONE
2h08_A_cavity_1	5	4.009	0.8018	5	0	0	0	0	0	Ribose-phosphate pyrophosphokinase 1	NONE	P60891	NONE	NONE	NONE
2bty_A_cavity_1	5	4.006	0.8012	5	0	0	0	0	0	Acetylglutamate kinase	NONE	Q9X2A4	NONE	NONE	NONE
1xjv_A_cavity_3	5	3.993	0.7986	3	1	0	0	1	0	Protection of telomeres protein 1	NONE	Q9NUX5	NONE	NONE	NONE
1l0v_P_cavity_2	5	3.993	0.7985	5	0	0	0	0	0	Fumarate reductase flavoprotein subunit	OXIDOREDUCTASE	FRDA_ECOLI	Two distinct, membrane-bound, FAD-containing enzymes are responsible for the catalysis of fumarate and succinate interconversion; the fumarate reductase is used in anaerobic growth, and the succinate dehydrogenase is used in aerobic growth.	NONE	NONE
2hmn_A_cavity_2	5	3.96	0.792	3	0	1	0	1	0	Naphthalene 1,2-dioxygenase subunit alpha	NONE	P0A111	NONE	NONE	NONE
1wde_A_cavity_2	5	3.945	0.789	3	1	0	1	0	0	Probable diphthine synthase	NONE	Q9YDI2	NONE	NONE	NONE
3d3l_B_cavity_3	5	3.941	0.7882	3	0	1	0	1	0	Arachidonate 12-lipoxygenase, 12S-type	NONE	P18054	NONE	NONE	NONE
1sfk_D_cavity_1	5	3.937	0.7875	5	0	0	0	0	0	Genome polyprotein	NONE	P14335	NONE	NONE	NONE
2fbw_Q_cavity_1	5	3.936	0.7872	5	0	0	0	0	0	Succinate dehydrogenase [ubiquinone] flavoprotein subunit, mitochondrial	NONE	Q9YHT1	NONE	NONE	NONE
1q78_A_cavity_5	5	3.921	0.7842	3	1	0	1	0	0	Poly(A) polymerase alpha	NONE	P25500	Involved in nucleotidyltransferase activity	NONE	NONE
1zte_C_cavity_1	5	3.913	0.7825	5	0	0	0	0	0	Superoxide dismutase [Mn], mitochondrial	NONE	P04179	NONE	NONE	NONE
1w07_B_cavity_3	5	3.881	0.7763	4	1	0	0	0	0	Acyl-coenzyme A oxidase 1, peroxisomal	NONE	O65202	Involved in acyl-CoA oxidase activity	NONE	NONE
1b0a_A_cavity_2	5	3.877	0.7753	5	0	0	0	0	0	Bifunctional protein folD	NONE	P24186	NONE	NONE	NONE
2p0r_B_cavity_2	5	3.865	0.773	3	1	0	1	0	0	Calpain-9	HYDROLASE	CAN9_HUMAN	Calcium-regulated non-lysosomal thiol-protease (By similarity).	NONE	NONE
2vfr_A_cavity_1	5	3.857	0.7714	4	0	1	0	0	0	Probable xylitol oxidase	NONE	Q9ZBU1	NONE	NONE	NONE
1vrb_B_cavity_3	6	4.569	0.7615	3	2	0	0	1	0	Uncharacterized protein yxbC	NONE	P46327	NONE	NONE	NONE
2f66_E_cavity_1	6	4.47	0.745	6	0	0	0	0	0	Suppressor protein STP22 of temperature-sensitive alpha-factor receptor and arginine permease	NONE	P25604	NONE	NONE	NONE
2vde_C_cavity_1	6	4.443	0.7404	3	1	1	1	0	0	Outer membrane protein tolC	NONE	P02930	Cell wall/membrane/envelope biogenesis	NONE	NONE
1fiz_A_cavity_4	6	4.411	0.7351	3	2	0	1	0	0	Acrosin	NONE	P08001	NONE	NONE	NONE
1ml8_A_cavity_1	6	4.375	0.7292	6	0	0	0	0	0	Protein yhfA	NONE	P0ADX3	NONE	NONE	NONE
2z5f_A_cavity_1	6	4.365	0.7274	3	1	1	0	1	0	Sulfotransferase family cytosolic 1B member 1	TRANSFERASE	ST1B1_HUMAN	Catalyzes the sulfate conjugation of many hormones, neurotransmitters, drugs and xenobiotic compounds. Sulfonation increases the water solubility of most compounds, and therefore their renal excretion, but it can also result in bioactivation to form activ	NONE	NONE
2b61_A_cavity_3	6	4.364	0.7273	2	2	1	1	0	0	Homoserine O-acetyltransferase	NONE	P45131	NONE	NONE	NONE
1ukf_A_cavity_1	6	4.341	0.7235	4	1	0	0	1	0	Cysteine protease avirulence protein avrPphB	NONE	Q52430	NONE	NONE	NONE
3epm_B_cavity_2	6	4.314	0.719	4	1	0	1	0	0	Thiamine biosynthesis protein thiC	NONE	Q9A6Q5	NONE	NONE	NONE
1tg6_A_cavity_2	6	4.309	0.7181	4	1	0	0	1	0	Putative ATP-dependent Clp protease proteolytic subunit, mitochondrial	HYDROLASE	CLPP_HUMAN	Clp cleaves peptides in various proteins in a process that requires ATP hydrolysis. Clp may be responsible for a fairly general and central housekeeping function rather than for the degradation of specific substrates.	NONE	NONE
1vbg_A_cavity_4	6	4.308	0.718	3	1	1	0	1	0	Pyruvate, phosphate dikinase 1, chloroplastic	NONE	P11155	Carbohydrate transport and metabolism	NONE	NONE
2ysw_C_cavity_1	8	5.733	0.7166	4	2	0	1	1	0	3-dehydroquinate dehydratase	NONE	O66440	NONE	NONE	NONE
1id3_A_cavity_1	6	4.264	0.7107	6	0	0	0	0	0	Histone H3	NONE	P61830	NONE	NONE	NONE
1hj1_A_cavity_1	6	4.221	0.7035	4	1	0	1	0	0	Estrogen receptor beta	NONE	Q62986	Involved in transcription factor activity	NONE	NONE
1lpj_A_cavity_1	6	4.216	0.7026	3	0	2	1	0	0	Retinoid-binding protein 7	NONE	Q96R05	Involved in retinoid binding	NONE	For the treatment of vitamin A deficiency.
2hka_C_cavity_1	6	4.215	0.7025	6	0	0	0	0	0	Epididymal secretory protein E1	NONE	P79345	NONE	NONE	NONE
1qwo_A_cavity_3	6	4.211	0.7018	3	2	0	0	1	0	3-phytase A	NONE	O00092	NONE	NONE	NONE
1k1g_A_cavity_1	6	4.208	0.7014	5	0	1	0	0	0	Splicing factor 1	NONE	Q15637	NONE	NONE	NONE
2gk9_A_cavity_2	6	4.183	0.6972	6	0	0	0	0	0	Phosphatidylinositol-5-phosphate 4-kinase type-2 gamma	NONE	Q8TBX8	NONE	NONE	NONE
1b5l_A_cavity_1	6	4.171	0.6952	2	2	1	0	1	0	Interferon tau-1	NONE	P56828	NONE	NONE	NONE
1x9f_I_cavity_1	9	6.252	0.6946	6	1	0	0	2	0	Extracellular globin-4	NONE	P13579	NONE	NONE	NONE
1e5q_D_cavity_4	6	4.164	0.694	3	1	1	1	0	0	Saccharopine dehydrogenase [NADP+, L-glutamate-forming]	NONE	Q9P4R4	Amino acid transport and metabolism	NONE	NONE
1sgm_B_cavity_1	6	4.149	0.6915	4	1	0	1	0	0	Uncharacterized HTH-type transcriptional regulator yxaF	NONE	P42105	NONE	NONE	NONE
1njf_D_cavity_1	6	4.136	0.6893	3	2	0	1	0	0	DNA polymerase III subunit tau	NONE	P06710	Involved in nucleotide binding	NONE	NONE
2bj3_A_cavity_1	6	4.119	0.6864	6	0	0	0	0	0	Putative nickel-responsive regulator	NONE	O58316	Involved in DNA binding	NONE	NONE
1u63_C_cavity_2	7	4.785	0.6835	5	0	1	1	0	0	50S ribosomal protein L1P	NONE	P54050	Translation, ribosomal structure and biogenesis	NONE	NONE
2bc9_A_cavity_1	6	4.096	0.6827	3	1	1	1	0	0	Interferon-induced guanylate-binding protein 1	NONE	P32455	NONE	NONE	NONE
1k44_E_cavity_1	6	4.073	0.6788	4	1	0	0	1	0	Nucleoside diphosphate kinase	NONE	P84284	NONE	NONE	NONE
2ytv_A_cavity_1	6	4.071	0.6785	3	1	2	0	0	0	Cold shock domain-containing protein E1	NONE	O75534	NONE	NONE	NONE
2j47_A_cavity_1	7	4.741	0.6773	3	1	1	0	2	0	O-GlcNAcase BT_4395	NONE	Q89ZI2	NONE	NONE	NONE
3bkb_A_cavity_3	6	4.062	0.677	3	2	0	0	1	0	Proto-oncogene tyrosine-protein kinase Fes/Fps	TRANSFERASE	FES_HUMAN	NONE	NONE	NONE
1l3g_A_cavity_1	6	4.058	0.6763	3	2	0	0	1	0	Transcription factor MBP1	NONE	P39678	NONE	NONE	NONE
2da7_A_cavity_1	7	4.731	0.6759	3	1	1	0	2	0	Zinc finger E-box-binding homeobox 2	NONE	O60315	NONE	NONE	NONE
1s5a_A_cavity_1	7	4.723	0.6747	3	1	1	2	0	0	Hypothetical protein yesE	NONE	O31511	NONE	NONE	NONE
1omw_A_cavity_8	6	4.044	0.674	4	1	1	0	0	0	Beta-adrenergic receptor kinase 1	NONE	P25098	Involved in G-protein coupled receptor kinase activity	NONE	For nutritional supplementation, also for treating dietary shortage or imbalance
2aao_A_cavity_1	6	4.029	0.6715	6	0	0	0	0	0	Calcium-dependent protein kinase 1	NONE	Q06850	NONE	NONE	NONE
3prc_M_cavity_6	7	4.7	0.6714	5	2	0	0	0	0	Photosynthetic reaction center cytochrome c subunit	NONE	P07173	NONE	NONE	NONE
2a7s_A_cavity_3	6	4.014	0.669	6	0	0	0	0	0	Probable propionyl-CoA carboxylase beta chain 5	NONE	P96885	NONE	NONE	NONE
1rym_A_cavity_1	8	5.349	0.6686	6	1	0	0	1	0	Chloroplastic group IIB intron splicing facilitator CRS2, chloroplastic	NONE	Q9M5P4	NONE	NONE	NONE
1y64_B_cavity_2	8	5.349	0.6686	6	1	0	0	1	0	Actin, alpha skeletal muscle	NONE	P68135	NONE	NONE	NONE
1in7_A_cavity_2	6	4.006	0.6677	2	3	0	0	1	0	Holliday junction ATP-dependent DNA helicase ruvB	NONE	Q56313	Involved in nucleotide binding	NONE	NONE
1fdy_B_cavity_2	6	4.003	0.6671	6	0	0	0	0	0	N-acetylneuraminate lyase	NONE	P0A6L4	Catalyzes the reversible aldol cleavage of N-acetylneuraminic acid (sialic acid; Neu5Ac) to form pyruvate and N-acetylmannosamine (ManNAc) via a Schiff base intermediate.	NONE	NONE
1wh0_A_cavity_1	6	4	0.6667	4	0	1	0	1	0	Ubiquitin carboxyl-terminal hydrolase 19	HYDROLASE	UBP19_HUMAN	Involved in the ubiquitin-dependent proteolytic pathway in conjunction with the 26S proteasome (By similarity).	NONE	NONE
2xat_A_cavity_2	6	4	0.6667	4	0	1	1	0	0	Chloramphenicol acetyltransferase	NONE	P26841	Involved in acyltransferase activity	NONE	Used in treatment of cholera, as it destroys the vibrios and decreases the diarrhea. It is effective against tetracycline-resistant vibrios. It is also used in eye drops or ointment to treat bacterial conjunctivitis.
1b4u_B_cavity_1	6	4	0.6667	4	0	1	0	1	0	Protocatechuate 4,5-dioxygenase alpha chain	NONE	P22635	NONE	NONE	NONE
1wru_A_cavity_3	6	4	0.6667	4	0	1	1	0	0	Baseplate protein	NONE	P08558	NONE	NONE	NONE
2w4o_A_cavity_1	6	3.988	0.6647	5	0	0	1	0	0	Calcium/calmodulin-dependent protein kinase type IV	NONE	Q16566	NONE	NONE	NONE
2i36_B_cavity_1	6	3.965	0.6608	5	1	0	0	0	0	Rhodopsin	NONE	P02699	NONE	NONE	NONE
1wjt_A_cavity_1	6	3.959	0.6598	6	0	0	0	0	0	Transcription elongation factor A protein 3	NONE	P23881	NONE	NONE	NONE
1t90_D_cavity_1	6	3.941	0.6569	3	1	0	0	2	0	Methylmalonate semialdehyde dehydrogenase [acylating]	NONE	P42412	NONE	NONE	NONE
2qc3_A_cavity_1	9	5.904	0.656	4	2	1	0	2	0	Malonyl CoA-acyl carrier protein transacylase	NONE	P63458	NONE	NONE	NONE
2vdg_A_cavity_1	7	4.59	0.6557	4	2	0	0	1	0	Aldose reductase	NONE	P23901	NONE	NONE	NONE
1s40_A_cavity_2	6	3.925	0.6542	4	1	0	0	1	0	Cell division control protein 13	NONE	P32797	NONE	NONE	NONE
1ahj_F_cavity_2	6	3.924	0.6541	6	0	0	0	0	0	Nitrile hydratase subunit alpha	NONE	P13448	NONE	NONE	NONE
1qjt_A_cavity_1	7	4.577	0.6539	4	2	1	0	0	0	Epidermal growth factor receptor substrate 15	NONE	P42567	NONE	NONE	NONE
1u6g_B_cavity_1	6	3.92	0.6533	4	0	1	1	0	0	Cullin-1	NONE	Q13616	NONE	NONE	NONE
1ma1_A_cavity_1	6	3.92	0.6533	5	1	0	0	0	0	Superoxide dismutase [Fe]	NONE	P18868	NONE	NONE	NONE
1xs8_A_cavity_1	6	3.917	0.6529	5	1	0	0	0	0	Probable Fe(2+)-trafficking protein	NONE	P67617	NONE	NONE	NONE
2d3a_I_cavity_2	6	3.912	0.652	2	1	1	2	0	0	Glutamine synthetase root isozyme 3	NONE	P38561	NONE	NONE	NONE
3c7g_A_cavity_3	6	3.91	0.6516	4	1	0	1	0	0	Arabinoxylan arabinofuranohydrolase	NONE	Q45071	NONE	NONE	NONE
2rmr_A_cavity_1	6	3.904	0.6507	5	1	0	0	0	0	Paired amphipathic helix protein Sin3a	NONE	Q60520	NONE	NONE	NONE
1uh6_A_cavity_1	6	3.899	0.6498	3	1	1	0	1	0	Ubiquitin-like protein 5	NONE	Q9EPV8	NONE	NONE	NONE
3epy_B_cavity_2	6	3.898	0.6497	6	0	0	0	0	0	Acyl-CoA-binding domain-containing protein 7	NONE	Q8N6N7	NONE	NONE	NONE
2k2q_A_cavity_2	6	3.895	0.6491	5	1	0	0	0	0	Tyrocidine synthetase 3	NONE	O30409	NONE	NONE	NONE
1rxt_C_cavity_3	6	3.884	0.6474	4	1	1	0	0	0	Glycylpeptide N-tetradecanoyltransferase 1	NONE	P30419	NONE	NONE	NONE
1jv1_A_cavity_3	6	3.884	0.6473	3	1	1	1	0	0	UDP-N-acetylhexosamine pyrophosphorylase	NONE	Q16222	Involved in nucleotidyltransferase activity	NONE	NONE
1f0x_A_cavity_2	6	3.875	0.6458	3	1	2	0	0	0	D-lactate dehydrogenase	OXIDOREDUCTASE	DLD_ECOLI	First component of the membrane-bound D-lactate oxidase, which is believed to play an important role in the energization of the active transport of a variety of sugars and amino acids.	NONE	NONE
1dus_A_cavity_2	6	3.874	0.6457	3	2	0	0	1	0	Protein MJ0882	NONE	Q58292	NONE	NONE	NONE
2hyd_A_cavity_2	6	3.87	0.6451	6	0	0	0	0	0	Putative multidrug export ATP-binding/permease protein SAV1866	NONE	Q99T13	NONE	NONE	NONE
1uvx_A_cavity_1	7	4.513	0.6448	5	1	0	0	1	0	Globin LI637	NONE	Q08753	Involved in oxygen binding	NONE	NONE
1w98_B_cavity_1	6	3.864	0.6441	3	1	1	1	0	0	G1/S-specific cyclin-E1	TRANSFERASE	CCNE1_HUMAN	Essential for the control of the cell cycle at the G1/S (start) transition.	NONE	NONE
1bq6_A_cavity_2	7	4.506	0.6438	4	1	1	0	1	0	Chalcone synthase 2	NONE	P30074	Secondary metabolites biosynthesis, transport and catabolism	NONE	NONE
1p4t_A_cavity_2	6	3.861	0.6436	5	1	0	0	0	0	Surface protein A	NONE	Q9RP17	Involved in porin activity	NONE	NONE
2jul_A_cavity_1	7	4.497	0.6425	7	0	0	0	0	0	Calsenilin	NONE	Q9QXT8	NONE	NONE	NONE
2pla_B_cavity_1	6	3.854	0.6423	2	4	0	0	0	0	Glycerol-3-phosphate dehydrogenase 1-like protein	NONE	Q8N335	NONE	NONE	NONE
1s9c_F_cavity_3	6	3.842	0.6404	5	0	0	1	0	0	Peroxisomal multifunctional enzyme type 2	NONE	P51659	Lipid transport and metabolism	NONE	Some evidence suggests that NADH might be useful in treating Parkinsons disease, chronic fatigue syndrome, Alzheimers disease and cardiovascular disease.
1rp8_A_cavity_1	8	5.115	0.6394	4	1	1	2	0	0	Alpha-amylase type A isozyme	NONE	P00693	Carbohydrate transport and metabolism	NONE	NONE
1inz_A_cavity_1	7	4.468	0.6383	4	1	1	1	0	0	Epsin-1	NONE	Q9Y6I3	NONE	NONE	NONE
1zrt_C_cavity_4	7	4.468	0.6383	6	1	0	0	0	0	Ubiquinol-cytochrome c reductase iron-sulfur subunit	NONE	P08500	NONE	NONE	NONE
1mg5_B_cavity_1	8	5.073	0.6342	5	1	1	1	0	0	Alcohol dehydrogenase	NONE	P00334	Involved in alcohol dehydrogenase activity	NONE	NONE
1n97_A_cavity_2	7	4.439	0.6342	6	1	0	0	0	0	Cytochrome P450	NONE	Q746J6	Involved in monooxygenase activity	NONE	NONE
1yiv_A_cavity_1	8	5.054	0.6318	4	2	0	2	0	0	Myelin P2 protein	NONE	P0C6G6	NONE	NONE	NONE
3brp_A_cavity_2	7	4.399	0.6284	4	0	2	1	0	0	C-phycocyanin alpha chain	NONE	P00306	NONE	NONE	NONE
2fyn_M_cavity_1	7	4.392	0.6274	7	0	0	0	0	0	Cytochrome b	NONE	Q02761	NONE	NONE	NONE
3b68_A_cavity_1	7	4.391	0.6273	5	0	1	0	1	0	Androgen receptor	TRANSCRIPTION	ANDR_HUMAN	Steroid hormone receptors are ligand-activated transcription factors that regulate eukaryotic gene expression and affect cellular proliferation and differentiation in target tissues. Transcription factor activity is modulated by bound coactivator and core	Genetic variation in AR can be responsible of androgenetic alopecia (AGA) [MIM:109200].;Defects in AR are the cause of androgen insensibility syndrome (AIS) [MIM:300068]; previously known as testicular feminization syndrome (TFM). It can be complete (CAIS) when external genitalia are phenotypically female; or partial (PAIS) when external genitalia are substantively ambiguous or mild (MAIS) when e…	Hypoactive sexual desire disorder;Hepatitis B virus infection;Cardiac failure;Andrology;Hirsutism;Female sexual dysfunction;Psoriasis;Reperfusion injury;Plasmodium infection;Atherosclerosis;Prostate hyperplasia;Fatigue;Male sexual dysfunction;Autoimmune disease;Testosterone deficiency;Uterine fibroids;Metabolic disorder;Myalgia;Obesity;Gynecological disorder;Contraception;Cancer;Hypercholesterole…
2iuk_B_cavity_1	7	4.383	0.6262	5	1	0	1	0	0	Seed lipoxygenase	NONE	P24095	NONE	NONE	NONE
2a98_A_cavity_2	8	4.995	0.6244	4	0	2	2	0	0	Inositol-trisphosphate 3-kinase C	NONE	Q96DU7	NONE	NONE	NONE
2vwt_A_cavity_1	9	5.615	0.6239	6	2	0	0	1	0	2-keto-3-deoxy-L-rhamnonate aldolase	NONE	P76469	NONE	NONE	NONE
1wxr_A_cavity_2	8	4.988	0.6235	4	1	1	2	0	0	Hemoglobin-binding protease hbp	NONE	O88093	NONE	NONE	NONE
2e74_A_cavity_3	7	4.346	0.6208	5	1	0	0	1	0	Cytochrome b6	NONE	P83791	Involved in oxidoreductase activity	NONE	NONE
1qib_A_cavity_1	8	4.962	0.6202	4	1	1	2	0	0	72 kDa type IV collagenase	HYDROLASE	MMP2_HUMAN	In addition to gelatin and collagens, it cleaves KiSS1 at a Gly-	-Leu bond.	Defects in MMP2 are the cause of multicentric osteolysis nodulosis and arthropathy (MONA) [MIM:605156]. Inherited osteolyses or vanishing bone syndromes are rare disorders of unknown etiology characterized by destruction and resorption of affected bones. MONA is an autosomal recessive osteolysis with multicentric involvement characterized by carpal and tarsal resorption, crippling arthritic chang…	NONE
2a2f_X_cavity_3	8	4.954	0.6192	4	1	1	0	2	0	Exocyst complex component 6	NONE	Q9VDE6	NONE	NONE	NONE
2zv8_A_cavity_2	11	6.803	0.6184	5	2	1	3	0	0	Tyrosine-protein kinase Lyn	NONE	P25911	NONE	NONE	NONE
2i5p_O_cavity_1	8	4.938	0.6173	6	1	1	0	0	0	Glyceraldehyde-3-phosphate dehydrogenase 1	NONE	P84998	NONE	NONE	NONE
1sjw_A_cavity_1	8	4.935	0.6168	5	0	2	1	0	0	Nogalonic acid methyl ester cyclase	NONE	Q9RN59	NONE	NONE	NONE
2hcb_B_cavity_2	7	4.314	0.6163	4	0	2	0	1	0	Chromosomal replication initiator protein dnaA	NONE	O66659	Involved in nucleotide binding	NONE	NONE
1ch4_A_cavity_1	9	5.542	0.6158	7	0	1	0	1	0	Hemoglobin subunit beta	OXYGEN TRANSPORT	HBB_HUMAN	Involved in oxygen transport from the lung to the various peripheral tissues.;LVV-hemorphin-7 potentiates the activity of bradykinin, causing a decrease in blood pressure.	Defects in HBB may be a cause of Heinz body anemias [MIM:140700]. This is a form of non-spherocytic hemolytic anemia of Dacie type 1. After splenectomy, which has little benefit, basophilic inclusions called Heinz bodies are demonstrable in the erythrocytes. Before splenectomy, diffuse or punctate basophilia may be evident. Most of these cases are probably instances of hemoglobinopathy. The hemog…	NONE
2daf_A_cavity_2	7	4.309	0.6155	5	1	0	0	1	0	IQ and ubiquitin-like domain-containing protein	NONE	Q8NA54	NONE	NONE	NONE
2zs0_C_cavity_1	8	4.922	0.6152	6	1	0	0	1	0	Extracellular giant hemoglobin major globin subunit A1	NONE	Q7M419	NONE	NONE	NONE
1f0n_A_cavity_1	9	5.525	0.6139	6	2	0	0	1	0	Antigen 85-B	NONE	P0C5B9	NONE	NONE	NONE
1xnr_J_cavity_1	7	4.297	0.6139	6	1	0	0	0	0	30S ribosomal protein S2	NONE	P80371	NONE	NONE	NONE
1or6_B_cavity_1	7	4.294	0.6134	5	1	0	1	0	0	Heme-based aerotactic transducer hemAT	NONE	O07621	Involved in signal transducer activity	NONE	NONE
3c10_C_cavity_1	8	4.901	0.6126	4	0	2	1	1	0	Histone deacetylase 7	HYDROLASE	HDAC7_HUMAN	Responsible for the deacetylation of lysine residues on the N-terminal part of the core histones (H2A, H2B, H3 and H4). Histone deacetylation gives a tag for epigenetic repression and plays an important role in transcriptional regulation, cell cycle progr	NONE	NONE
1r6u_A_cavity_4	7	4.284	0.612	4	1	1	0	1	0	Tryptophanyl-tRNA synthetase, cytoplasmic	NONE	P23381	Translation, ribosomal structure and biogenesis	NONE	Tryptophan may be useful in increasing serotonin production, promoting healthy sleep, managing depression by enhancing mental and emotional well-being, managing pain tolerance, and managing weight.
1gk9_B_cavity_7	7	4.278	0.6111	4	1	1	0	1	0	Penicillin G acylase	NONE	P06875	NONE	NONE	NONE
1xdt_T_cavity_3	7	4.266	0.6094	5	0	1	1	0	0	Proheparin-binding EGF-like growth factor	COMPLEX (TOXIN/GROWTH FACTOR)	HBEGF_HUMAN	May be involved in macrophage-mediated cellular proliferation. It is mitogenic for fibroblasts and smooth muscle but not endothelial cells. It is able to bind EGF receptors with higher affinity than EGF itself and is a far more potent mitogen for smooth m	NONE	NONE
1l7b_A_cavity_1	7	4.264	0.6091	5	0	1	1	0	0	DNA ligase	NONE	P26996	NONE	NONE	NONE
2fvl_B_cavity_1	7	4.262	0.6089	4	2	0	0	1	0	Aldo-keto reductase family 1 member C4	NONE	P17516	NONE	NONE	NONE
2dy3_C_cavity_1	9	5.477	0.6086	5	1	1	0	2	0	Alanine racemase	NONE	Q8RSU9	NONE	NONE	NONE
1ntg_D_cavity_1	7	4.253	0.6075	4	0	2	1	0	0	Tyrosyl-tRNA synthetase, cytoplasmic	NONE	P54577	Translation, ribosomal structure and biogenesis	NONE	Tyrosine is claimed to act as an effective antidepressant, however results are mixed. Tyrosine has also been claimed to reduce stress and combat narcolepsy and chronic fatigue, however these claims have been refuted by some studies.
1wpx_B_cavity_1	7	4.246	0.6066	4	1	1	0	1	0	Carboxypeptidase Y	NONE	P00729	NONE	NONE	NONE
2veq_A_cavity_5	8	4.839	0.6049	4	1	1	0	2	0	Centromere DNA-binding protein complex CBF3 subunit B	NONE	P40969	NONE	NONE	NONE
1a57_A_cavity_1	9	5.426	0.6029	5	1	1	2	0	0	Fatty acid-binding protein, intestinal	NONE	P02693	Involved in transporter activity	NONE	NONE
1xg4_A_cavity_1	11	6.608	0.6007	6	1	2	0	2	0	Methylisocitrate lyase	NONE	P77541	Carbohydrate transport and metabolism	NONE	NONE
1emy_A_cavity_1	10	6	0.6	6	1	1	0	2	0	Myoglobin	NONE	P02186	NONE	NONE	NONE
1yf6_L_cavity_2	7	4.19	0.5986	7	0	0	0	0	0	Reaction center protein H chain	NONE	P0C0Y7	NONE	NONE	NONE
1e29_A_cavity_1	7	4.177	0.5967	6	1	0	0	0	0	Cytochrome c-550	NONE	Q55013	NONE	NONE	NONE
1onq_C_cavity_1	7	4.176	0.5965	4	1	1	0	1	0	T-cell surface glycoprotein CD1a	IMMUNE SYSTEM	CD1A_HUMAN	Antigen-presenting protein that binds self and non-self lipid and glycolipid antigens and presents them to T-cell receptors on natural killer T-cells.	NONE	NONE
1rqe_A_cavity_2	8	4.768	0.596	5	0	2	0	1	0	Methylmalonyl-CoA carboxyltransferase 5S subunit	NONE	Q70AC7	Energy production and conversion	NONE	NONE
1ifv_B_cavity_2	8	4.768	0.596	3	1	1	0	3	0	Protein LlR18B	NONE	P52779	NONE	NONE	NONE
1ith_B_cavity_1	8	4.753	0.5941	6	1	0	0	1	0	Hemoglobin F-I	NONE	P06148	NONE	NONE	NONE
2ql6_E_cavity_1	8	4.747	0.5934	4	1	1	1	1	0	Nicotinamide riboside kinase 1	SIGNALING PROTEIN,TRANSFERASE	NRK1_HUMAN	Catalyzes the phosphorylation of nicotinamide riboside (NR) and nicotinic acid riboside (NaR) to form nicotinamide mononucleotide (NMN) and nicotinic acid mononucleotide (NaMN). The enzyme also phosphorylates the antitumor drugs tiazofurin and 3- deazagua	NONE	NONE
1vap_A_cavity_1	8	4.741	0.5926	4	0	2	2	0	0	Phospholipase A2	NONE	P51972	NONE	NONE	NONE
2bjh_B_cavity_2	7	4.147	0.5925	3	1	1	0	2	0	Feruloyl esterase A	NONE	O42807	NONE	NONE	NONE
2czt_A_cavity_1	9	5.331	0.5923	7	0	1	0	1	0	Prostaglandin-H2 D-isomerase	NONE	O09114	NONE	NONE	NONE
2pgh_B_cavity_1	8	4.732	0.5915	6	0	1	0	1	0	Hemoglobin subunit alpha	NONE	P01965	NONE	NONE	NONE
2ii4_B_cavity_2	7	4.135	0.5907	5	2	0	0	0	0	Lipoamide acyltransferase component of branched-chain alpha-keto acid dehydrogenase complex, mitochondrial	NONE	P11181	NONE	NONE	NONE
2bsk_D_cavity_1	8	4.719	0.5898	5	0	1	0	2	0	Mitochondrial import inner membrane translocase subunit Tim9	NONE	Q9Y5J7	NONE	NONE	NONE
1ega_B_cavity_1	7	4.123	0.589	4	1	1	0	1	0	GTP-binding protein era	NONE	P06616	NONE	NONE	NONE
1v5w_B_cavity_1	7	4.114	0.5877	4	0	1	2	0	0	Meiotic recombination protein DMC1/LIM15 homolog	NONE	Q14565	NONE	NONE	NONE
3fbi_A_cavity_1	8	4.695	0.5869	4	0	2	2	0	0	Mediator of RNA polymerase II transcription subunit 7	NONE	Q08278	NONE	NONE	NONE
1js6_B_cavity_2	7	4.103	0.5861	7	0	0	0	0	0	Aromatic-L-amino-acid decarboxylase	NONE	P80041	Catalyzes the decarboxylation of L-3,4-dihydroxyphenylalanine (DOPA) to dopamine, L-5-hydroxytryptophan to serotonin and L-tryptophan to tryptamine.	NONE	NONE
1t8w_E_cavity_3	7	4.102	0.586	1	2	2	2	0	0	AMP nucleosidase	NONE	P0AE13	NONE	NONE	NONE
2goy_G_cavity_1	7	4.098	0.5854	5	2	0	0	0	0	Phosphoadenosine phosphosulfate reductase	NONE	O05927	NONE	NONE	NONE
2c96_A_cavity_1	8	4.681	0.5851	5	2	0	0	1	0	Psp operon transcriptional activator	NONE	P37344	NONE	NONE	NONE
1yle_A_cavity_1	7	4.091	0.5844	6	0	1	0	0	0	Arginine N-succinyltransferase subunit alpha	NONE	P80357	Involved in binding	NONE	NONE
2acm_B_cavity_1	7	4.085	0.5835	6	1	0	0	0	0	Mucin-1	NONE	P15941	NONE	NONE	NONE
1wdw_G_cavity_1	8	4.661	0.5826	5	0	1	1	1	0	Tryptophan synthase alpha chain	NONE	Q8U094	NONE	NONE	NONE
2bcg_G_cavity_1	7	4.078	0.5825	7	0	0	0	0	0	Rab GDP-dissociation inhibitor	NONE	P39958	NONE	NONE	NONE
1jtb_A_cavity_1	7	4.078	0.5825	6	0	1	0	0	0	Nonspecific lipid-transfer protein 1	NONE	P07597	Involved in lipid binding	NONE	NONE
1xk0_A_cavity_1	7	4.066	0.5808	5	0	1	0	1	0	Heme oxygenase 1	OXIDOREDUCTASE	HMOX1_HUMAN	Heme oxygenase cleaves the heme ring at the alpha methene bridge to form biliverdin. Biliverdin is subsequently converted to bilirubin by biliverdin reductase. Under physiological conditions, the activity of heme oxygenase is highest in the spleen, where	NONE	Sepsis;Cancer
1oi8_B_cavity_2	7	4.065	0.5808	4	1	1	1	0	0	Protein ushA	NONE	P07024	Involved in hydrolase activity	NONE	NONE
1z5l_C_cavity_1	9	5.22	0.58	5	1	1	0	2	0	T-cell surface glycoprotein CD1d1	NONE	P11609	Not known	NONE	NONE
2afj_A_cavity_3	7	4.059	0.5798	4	1	1	1	0	0	SPRY domain-containing SOCS box protein 2	NONE	O88838	NONE	NONE	NONE
2c2c_A_cavity_1	9	5.197	0.5775	6	1	1	0	1	0	Cytochrome c2	NONE	P0C189	NONE	NONE	NONE
2w9h_A_cavity_1	9	5.196	0.5774	5	1	1	1	1	0	Dihydrofolate reductase	NONE	P0A017	NONE	NONE	NONE
1vcn_A_cavity_1	8	4.619	0.5774	4	1	1	1	1	0	CTP synthase	NONE	Q5SIA8	NONE	NONE	NONE
1zyi_A_cavity_3	8	4.618	0.5772	8	0	0	0	0	0	Methylosome subunit pICln	NONE	P35521	NONE	NONE	NONE
1wjp_A_cavity_1	7	4.035	0.5764	4	1	1	0	1	0	Zinc finger protein 295	NONE	Q9ULJ3	NONE	NONE	NONE
2lh5_A_cavity_1	8	4.605	0.5757	6	1	0	0	1	0	Leghemoglobin-2	NONE	P02240	Cell motility	NONE	NONE
1tw2_B_cavity_3	7	4.028	0.5754	4	1	0	2	0	0	Carminomycin 4-O-methyltransferase	NONE	Q06528	Secondary metabolites biosynthesis, transport and catabolism	NONE	NONE
3cz8_B_cavity_3	7	4.024	0.5749	6	1	0	0	0	0	Putative sporulation-specific glycosylase ydhD	NONE	O05495	NONE	NONE	NONE
3b46_B_cavity_2	8	4.596	0.5745	4	2	0	2	0	0	Probable kynurenine--oxoglutarate transaminase BNA3	NONE	P47039	NONE	NONE	NONE
1a4e_A_cavity_2	7	4.018	0.574	6	1	0	0	0	0	Peroxisomal catalase A	NONE	P15202	Involved in catalase activity	NONE	NONE
1hfe_M_cavity_4	7	4.015	0.5735	3	1	1	1	1	0	Periplasmic [Fe] hydrogenase large subunit	NONE	P07598	NONE	NONE	NONE
2qxx_A_cavity_1	8	4.579	0.5724	6	2	0	0	0	0	Deoxycytidine triphosphate deaminase	NONE	O07247	NONE	NONE	NONE
1pkq_G_cavity_1	7	4.003	0.5719	5	0	1	0	1	0	Myelin-oligodendrocyte glycoprotein	NONE	Q63345	NONE	NONE	NONE
1q8b_A_cavity_1	7	4	0.5714	4	0	1	1	1	0	Uncharacterized protein yjcS	NONE	O31641	NONE	NONE	NONE
1ovt_A_cavity_6	7	3.998	0.5712	3	2	2	0	0	0	Ovotransferrin	NONE	P02789	Involved in ferric iron binding	NONE	NONE
2gta_C_cavity_1	8	4.569	0.5711	7	1	0	0	0	0	Uncharacterized protein ypjD	NONE	P42979	NONE	NONE	NONE
2vv5_F_cavity_2	7	3.998	0.5711	6	1	0	0	0	0	Small-conductance mechanosensitive channel	MEMBRANE PROTEIN	MSCS_ECOLI	Mechanosensitive channel that participates in the regulation of osmotic pressure changes within the cell, opening in response to stretch forces in the membrane lipid bilayer, without the need for other proteins. Forms an ion channel of 1.0 nanosiemens con;The channel pore is formed by TM3 and the loop between TM2 and TM3. After a sharp turn at Gly-113, an alpha-helix (residues 114-127) is oriente…	NONE	NONE
3eay_A_cavity_1	7	3.997	0.571	3	1	1	0	2	0	Sentrin-specific protease 7	HYDROLASE	SENP7_HUMAN	Protease that deconjugates SUMO2 and SUMO3 from targeted proteins, but not SUMO1. Catalyzes the deconjugation of poly-SUMO2 and poly-SUMO3 chains. Has very low efficiency in processing full- length SUMO proteins to their mature forms.	NONE	NONE
1z45_A_cavity_4	7	3.996	0.5709	3	0	2	2	0	0	GAL10 bifunctional protein [Includes: UDP-glucose 4-epimerase	NONE	P04397	Cell wall/membrane/envelope biogenesis	NONE	NONE
1b0n_B_cavity_1	7	3.995	0.5707	6	1	0	0	0	0	HTH-type transcriptional regulator sinR	NONE	P06533	NONE	NONE	NONE
2iwg_E_cavity_1	10	5.702	0.5702	4	0	3	3	0	0	52 kDa Ro protein	IMMUNOGLOBULIN DOMAIN	RO52_HUMAN	Ribonucleoprotein particle composed of a single polypeptide and one of four small RNA molecules. It is present in all mammalian cells studied but has no known function. At least two isoforms are present in nucleated and red blood cells, and tissue specifi	Sera from patients with systemic lupus erythematosus (SLE) or primary Sjoegren syndrome often contain antibodies that react with normal cellular RO protein as if this antigen was foreign.	NONE
1g2x_A_cavity_1	9	5.127	0.5696	4	1	2	2	0	0	Phospholipase A2 KPA2	NONE	Q9DF52	Involved in phospholipase A2 activity	NONE	NONE
2qtv_A_cavity_6	7	3.987	0.5696	3	1	1	0	2	0	Protein transport protein SEC23	NONE	P15303	NONE	NONE	NONE
2bxr_A_cavity_2	7	3.986	0.5694	5	1	1	0	0	0	Amine oxidase [flavin-containing] A	OXIDOREDUCTASE	AOFA_HUMAN	Catalyzes the oxidative deamination of biogenic and xenobiotic amines and has important functions in the metabolism of neuroactive and vasoactive amines in the central nervous system and peripheral tissues. MAOA preferentially oxidizes biogenic amines suc	Defects in MAOA are the cause of Brunner syndrome [MIM:300615]. Brunner syndrome is a form of X-linked non- dysmorphic mild mental retardation. Male patients are affected by a syndrome of borderline mental retardation and exhibit abnormal behavior, including disturbed regulation of impulsive aggression. Obligate female carriers have normal intelligence and behavior.	Muscle spasm;Cerebral hypoxia;Pain;Major depressive disorder;Epilepsy;Cognitive disorder;Cerebral infarction;Attention deficit hyperactivity disorder;Anxiety disorder;Parkinsons disease;Neuropathic pain;Amnesia;Alzheimers disease;Nicotine dependence;Dementia;Cerebrovascular ischemia;Psychotic disorder
1aip_D_cavity_1	8	4.554	0.5693	4	2	1	1	0	0	Elongation factor Tu-A	NONE	P60338	NONE	NONE	NONE
1ix1_B_cavity_1	7	3.985	0.5693	3	1	1	1	1	0	Peptide deformylase	NONE	Q9I7A8	Translation, ribosomal structure and biogenesis	NONE	NONE
1pkh_A_cavity_3	8	4.554	0.5692	2	1	2	2	1	0	dCTP deaminase, dUMP-forming	NONE	Q57872	Nucleotide transport and metabolism	NONE	NONE
1aq0_B_cavity_1	7	3.982	0.5688	6	0	0	1	0	0	Lichenase-2	NONE	P12257	Involved in hydrolase activity, hydrolyzing O-glycosyl compounds	NONE	NONE
1k1d_A_cavity_2	7	3.98	0.5686	3	1	1	1	1	0	D-hydantoinase	NONE	Q45515	Nucleotide transport and metabolism	NONE	NONE
2cxq_A_cavity_2	7	3.978	0.5683	4	1	1	1	0	0	Glucose-6-phosphate isomerase	NONE	P06745	Carbohydrate transport and metabolism	NONE	NONE
1qgx_A_cavity_1	10	5.681	0.5681	3	2	2	1	2	0	3(2),5-bisphosphate nucleotidase	NONE	P32179	Involved in 3(2),5-bisphosphate nucleotidase activity	NONE	NONE
2vof_C_cavity_1	7	3.971	0.5673	6	0	1	0	0	0	Bcl-2-related protein A1	NONE	Q07440	NONE	NONE	NONE
1k4w_A_cavity_2	8	4.538	0.5672	6	2	0	0	0	0	Nuclear receptor ROR-beta	NONE	P45446	Nuclear receptor that binds DNA as a monomer to ROR response elements (RORE) containing a single core motif half-site 5'-AGGTCA-3' preceded by a short A-T-rich sequence. Considered to have intrinsic transcriptional activity, have some natural ligands such as all-trans retinoic acid (ATRA) and other retinoids which act as inverse agonists repressing the transcriptional activity. Required for norma…	NONE	NONE
2agj_H_cavity_2	7	3.969	0.567	3	1	1	1	1	0	Ig mu chain C region	NONE	P01871	NONE	NONE	NONE
1so0_C_cavity_1	7	3.966	0.5666	3	0	2	1	1	0	Aldose 1-epimerase	NONE	Q96C23	NONE	NONE	NONE
2yw2_A_cavity_3	7	3.964	0.5663	3	0	2	1	1	0	Phosphoribosylamine--glycine ligase	NONE	O66949	NONE	NONE	NONE
1p16_B_cavity_4	7	3.962	0.566	3	1	1	2	0	0	mRNA-capping enzyme subunit alpha	NONE	P78587	NONE	NONE	NONE
1xpo_B_cavity_3	7	3.956	0.5651	3	2	0	2	0	0	Transcription termination factor rho	NONE	P0AG30	Facilitates transcription termination by a mechanism that involves Rho binding to the nascent RNA, activation of Rho's RNA-dependent ATPase activity, and release of the mRNA from the DNA template. RNA-dependent NTPase which utilizes all four ribonucleoside triphosphates as substrates.	NONE	NONE
2om5_A_cavity_2	7	3.954	0.5649	3	1	1	2	0	0	Contactin-2	NONE	Q02246	NONE	NONE	NONE
3bom_B_cavity_1	7	3.953	0.5648	6	0	0	0	1	0	Hemoglobin subunit alpha-4	NONE	P14527	NONE	NONE	NONE
2ju0_A_cavity_2	7	3.953	0.5648	6	0	1	0	0	0	Calcium-binding protein NCS-1	NONE	Q06389	NONE	NONE	NONE
2hzb_A_cavity_1	14	7.9	0.5643	8	2	1	3	0	0	UPF0052 protein BH3568	NONE	Q9K706	NONE	NONE	NONE
2ee4_A_cavity_1	8	4.514	0.5643	5	2	0	0	1	0	Rho GTPase-activating protein 5	NONE	Q13017	NONE	NONE	NONE
1oz7_A_cavity_1	8	4.513	0.5641	4	1	2	1	0	0	Echicetin subunit alpha	NONE	Q7T248	NONE	NONE	NONE
2hh8_A_cavity_1	7	3.949	0.5641	3	1	1	1	1	0	Uncharacterized protein ydfO	NONE	P76156	NONE	NONE	NONE
1j3x_A_cavity_2	7	3.949	0.5641	3	2	0	0	2	0	High mobility group protein B2	NONE	P17741	NONE	NONE	NONE
2r6z_B_cavity_1	11	6.195	0.5631	5	2	2	2	0	0	UPF0341 protein in rsp 3region	NONE	P72077	NONE	NONE	NONE
1nd7_A_cavity_2	8	4.505	0.5631	3	1	2	1	1	0	NEDD4-like E3 ubiquitin-protein ligase WWP1	NONE	Q9H0M0	NONE	NONE	NONE
1s9u_A_cavity_1	7	3.939	0.5627	3	1	1	1	1	0	Twin-arginine leader-binding protein dmsD	NONE	Q8ZPK0	NONE	NONE	NONE
1t9g_S_cavity_1	7	3.937	0.5625	3	0	2	1	1	0	Medium-chain specific acyl-CoA dehydrogenase, mitochondrial	OXIDOREDUCTASE, ELECTRON TRANSPORT	ACADM_HUMAN	This enzyme is specific for acyl chain lengths of 4 to 16.	Defects in ACADM are the cause of medium-chain acyl-CoA dehydrogenase deficiency (MCAD deficiency) [MIM:201450]. It is an autosomal recessive disease which causes fasting hypoglycemia, hepatic dysfunction, and encephalopathy, often resulting in death in infancy. The disease frequency is one in 13000.	NONE
3dwl_D_cavity_1	7	3.937	0.5624	6	0	0	0	1	0	Actin-related protein 3	NONE	P32390	NONE	NONE	NONE
1a8p_A_cavity_1	7	3.937	0.5624	6	1	0	0	0	0	Ferredoxin--NADP reductase	NONE	Q44532	Involved in oxidoreductase activity	NONE	NONE
1wgw_A_cavity_1	7	3.935	0.5622	6	1	0	0	0	0	Signal recognition particle 54 kDa protein	NONE	P14576	NONE	NONE	NONE
2hi7_B_cavity_2	8	4.497	0.5621	7	0	1	0	0	0	Thio	NONE	P0AEG4	NONE	NONE	NONE
1gqm_E_cavity_1	7	3.928	0.5612	6	0	1	0	0	0	Protein S100-A12	CALCIUM BINDING	S10AC_HUMAN	Calcitermin possesses antifungal activity against C.albicans and is also active against E.coli and P.aeruginosa but not L.monocytogenes and S.aureus.	NONE	NONE
1n60_B_cavity_2	7	3.928	0.5612	5	2	0	0	0	0	Carbon monoxide dehydrogenase small chain	NONE	P19921	NONE	NONE	NONE
3gyr_C_cavity_4	8	4.488	0.561	3	2	0	1	2	0	Phenoxazinone synthase	NONE	Q53692	NONE	NONE	NONE
2j8w_A_cavity_1	9	5.048	0.5609	5	1	1	0	2	0	Cytochrome c	NONE	P00142	NONE	NONE	NONE
3fz7_F_cavity_2	7	3.927	0.5609	5	0	1	1	0	0	Glutamate decarboxylase beta	NONE	P69910	NONE	NONE	NONE
2ayl_B_cavity_6	8	4.486	0.5608	5	1	0	0	2	0	Prostaglandin G/H synthase 1	NONE	P05979	Involved in peroxidase activity	NONE	NONE
1prx_A_cavity_1	7	3.926	0.5608	6	1	0	0	0	0	Peroxiredoxin-6	NONE	P30041	NONE	NONE	NONE
3cp8_D_cavity_3	7	3.925	0.5606	3	1	1	2	0	0	tRNA uridine 5-carboxymethylaminomethyl modification enzyme mnmG	NONE	Q8KA85	NONE	NONE	NONE
2vas_A_cavity_5	7	3.919	0.5598	4	1	1	0	1	0	Myosin-VI	NONE	Q29122	NONE	NONE	NONE
1vk0_F_cavity_1	7	3.916	0.5595	4	0	2	1	0	0	Uncharacterized protein At5g06450	NONE	Q9FNG3	NONE	NONE	NONE
1vi1_B_cavity_2	7	3.915	0.5593	5	0	1	1	0	0	Fatty acid/phospholipid synthesis protein plsX	NONE	P71018	NONE	NONE	NONE
6req_D_cavity_1	7	3.914	0.5592	4	2	0	0	1	0	Methylmalonyl-CoA mutase large subunit	NONE	P11653	NONE	NONE	NONE
3bxj_A_cavity_2	7	3.913	0.559	4	2	0	1	0	0	Ras GTPase-activating protein SynGAP	NONE	Q9QUH6	NONE	NONE	NONE
1h9t_A_cavity_1	8	4.47	0.5588	7	1	0	0	0	0	Fatty acid metabolism regulator protein	NONE	P0A8V6	NONE	NONE	NONE
1d5y_D_cavity_1	8	4.469	0.5586	4	2	0	1	1	0	Right origin-binding protein	NONE	P0ACI0	NONE	NONE	NONE
1bin_B_cavity_1	7	3.905	0.5578	6	0	0	0	1	0	Leghemoglobin A	NONE	P02238	Involved in iron ion binding	NONE	NONE
1q1l_C_cavity_3	8	4.459	0.5574	5	1	1	0	1	0	Chorismate synthase	NONE	O66493	NONE	NONE	NONE
2hzt_C_cavity_1	7	3.901	0.5573	6	0	1	0	0	0	Uncharacterized HTH-type transcriptional regulator ytcD	NONE	O34533	NONE	NONE	NONE
1vq0_A_cavity_1	8	4.458	0.5572	5	1	1	1	0	0	33 kDa chaperonin	NONE	Q9X1B4	Involved in unfolded protein binding	NONE	NONE
2hzv_C_cavity_1	7	3.899	0.557	5	2	0	0	0	0	Nickel-responsive regulator	NONE	P0A6Z6	NONE	NONE	NONE
2aa7_A_cavity_1	7	3.896	0.5566	5	2	0	0	0	0	Mineralocorticoid receptor	TRANSCRIPTION	MCR_HUMAN	Receptor for both mineralocorticoids (MC) such as aldosterone and glucocorticoids (GC) such as corticosterone or cortisol. Binds to mineralocorticoid response elements (MRE) and transactivates target genes. The effect of MC is to increase ion and water tr	Defects in NR3C2 are a cause of autosomal dominant pseudohypoaldosteronism type I (PHA1) [MIM:177735]. PHA1 is characterized by urinary salt wasting, resulting from target organ unresponsiveness to mineralocorticoids. There are 2 forms of PHA1: the autosomal dominant form that is mild, and the recessive form which is more severe and due to defects in any of the epithelial sodium channel subunits.…	Metabolic disorder;Hypertension;Cardiovascular disease;Urinary tract disease
2i3q_A_cavity_1	7	3.892	0.5561	3	1	1	0	2	0	DNA endonuclease I-CreI	NONE	P05725	NONE	NONE	NONE
1rip_A_cavity_1	7	3.89	0.5558	3	0	2	2	0	0	30S ribosomal protein S17	NONE	P23828	NONE	NONE	NONE
3gan_A_cavity_1	7	3.889	0.5556	5	0	2	0	0	0	Uncharacterized protein At3g22680	NONE	Q9LUJ3	NONE	NONE	NONE
1vr3_A_cavity_2	7	3.889	0.5555	3	1	1	1	1	0	1,2-dihydroxy-3-keto-5-methylthiopentene dioxygenase	NONE	Q99JT9	Has aci-reductone dioxygenase (ARD) activity and can function in the 5-methylthioadenosine (MTA) methionine salvage pathway (By similarity)	NONE	NONE
1r4w_B_cavity_1	8	4.443	0.5554	7	1	0	0	0	0	Glutathione S-transferase kappa 1	NONE	P24473	Involved in protein disulfide oxidoreductase activity	NONE	For nutritional supplementation, also for treating dietary shortage or imbalance
1gtt_C_cavity_2	8	4.441	0.5552	3	1	2	2	0	0	Homoprotocatechuate catabolism bifunctional isomerase/decarboxylase	NONE	P37352	NONE	NONE	NONE
1m3s_A_cavity_1	7	3.88	0.5542	4	1	1	0	1	0	3-hexulose-6-phosphate isomerase	NONE	P42404	NONE	NONE	NONE
1hpl_A_cavity_1	9	4.987	0.5541	4	0	3	2	0	0	Pancreatic triacylglycerol lipase	NONE	P29183	NONE	NONE	NONE
1m0t_A_cavity_1	7	3.878	0.5541	3	1	1	1	1	0	Glutathione synthetase	NONE	Q08220	Involved in glutathione synthesis activity	NONE	NONE
1bs2_A_cavity_3	7	3.876	0.5537	6	1	0	0	0	0	Arginyl-tRNA synthetase, cytoplasmic	NONE	Q05506	NONE	NONE	NONE
1mj4_A_cavity_1	7	3.875	0.5535	6	1	0	0	0	0	Sulfite oxidase, mitochondrial	NONE	P51687	NONE	NONE	NONE
1eu1_A_cavity_7	9	4.98	0.5533	5	1	1	1	1	0	Dimethyl sulfoxide reductase	NONE	Q57366	Energy production and conversion	NONE	NONE
2qnc_B_cavity_1	7	3.871	0.553	6	1	0	0	0	0	Recombination endonuclease VII	NONE	P13340	NONE	NONE	NONE
1uym_A_cavity_1	8	4.42	0.5525	4	1	0	0	3	0	Heat shock protein HSP 90-beta	NONE	P08238	Posttranslational modification, protein turnover, chaperones	NONE	NONE
1lnm_A_cavity_2	7	3.864	0.5521	5	0	1	0	1	0	Bilin-binding protein	LIGAND BINDING PROTEIN	BBP_PIEBR	This protein binds the blue pigments bilins.	NONE	NONE
2zcu_A_cavity_2	7	3.862	0.5516	5	0	1	1	0	0	Uncharacterized oxidoreductase ytfG	NONE	P39315	NONE	NONE	NONE
1h6n_A_cavity_5	12	6.616	0.5514	6	2	1	0	3	0	Catalase	NONE	P42321	Inorganic ion transport and metabolism	NONE	NONE
1h4j_A_cavity_4	7	3.858	0.5511	1	2	1	1	2	0	Methanol dehydrogenase subunit 1	NONE	P16027	NONE	NONE	NONE
1lns_A_cavity_2	7	3.855	0.5508	3	0	2	1	1	0	Xaa-Pro dipeptidyl-peptidase	NONE	P22346	NONE	NONE	NONE
1xup_O_cavity_3	7	3.852	0.5503	4	1	1	0	1	0	Glycerol kinase	NONE	O34153	NONE	NONE	NONE
2vz6_A_cavity_1	8	4.402	0.5502	5	2	0	1	0	0	Calcium/calmodulin-dependent protein kinase type II alpha chain	TRANSFERASE	KCC2A_HUMAN	CaM-kinase II (CAMK2) is a prominent kinase in the central nervous system that may function in long-term potentiation and neurotransmitter release. Member of the NMDAR signaling complex in excitatory synapses it may regulate NMDAR-dependent potentiation o	NONE	NONE
1v6a_A_cavity_2	8	4.4	0.5501	4	0	2	0	2	0	L-lactate dehydrogenase A chain	NONE	Q9W7K5	NONE	NONE	NONE
2cst_B_cavity_1	7	3.85	0.55	5	1	0	1	0	0	Aspartate aminotransferase, cytoplasmic	NONE	P00504	Involved in transferase activity, transferring nitrogenous groups	NONE	NONE
1zbt_A_cavity_1	7	3.849	0.5499	3	0	2	2	0	0	Peptide chain release factor 1	NONE	Q8DU64	NONE	NONE	NONE
3glb_C_cavity_2	7	3.848	0.5497	4	1	1	1	0	0	HTH-type transcriptional regulator catM	NONE	P07774	NONE	NONE	NONE
1j7x_A_cavity_3	7	3.847	0.5496	4	1	1	1	0	0	Retinol-binding protein 3	NONE	Q7SZI7	NONE	NONE	NONE
2f4n_C_cavity_1	9	4.944	0.5493	3	1	2	3	0	0	Uncharacterized protein MJ1651	NONE	Q59045	NONE	NONE	NONE
1ycd_A_cavity_2	7	3.845	0.5493	4	0	2	1	0	0	Family of serine hydrolases 1	NONE	P38777	NONE	NONE	NONE
1eo8_H_cavity_1	7	3.844	0.5492	6	1	0	0	0	0	Hemagglutinin	NONE	P03437	Involved in host cell surface receptor binding	NONE	NONE
1r19_A_cavity_1	7	3.843	0.549	5	1	1	0	0	0	Serine-aspartate repeat-containing protein G	NONE	Q9KI13	NONE	NONE	NONE
1lss_B_cavity_1	7	3.841	0.5487	7	0	0	0	0	0	Trk system potassium uptake protein trkA homolog	NONE	Q58505	Involved in cation transmembrane transporter activity	NONE	NONE
3ecp_A_cavity_3	7	3.841	0.5487	6	0	1	0	0	0	Transposase for transposon Tn5	NONE	Q46731	NONE	NONE	NONE
1vc4_B_cavity_2	8	4.386	0.5483	4	1	1	1	1	0	Indole-3-glycerol phosphate synthase	NONE	P84126	Involved in indole-3-glycerol-phosphate synthase activity	NONE	NONE
2fr2_A_cavity_1	8	4.384	0.548	7	0	0	0	1	0	UPF0678 fatty acid-binding protein-like protein Rv2717c/MT2790	NONE	O07216	NONE	NONE	NONE
1ouu_B_cavity_1	8	4.38	0.5475	5	0	1	0	2	0	Hemoglobin subunit alpha-1	NONE	P02019	NONE	NONE	NONE
1rxq_D_cavity_1	10	5.473	0.5473	4	1	2	1	2	0	Putative metal-dependent hydrolase yfiT	NONE	O31562	NONE	NONE	NONE
1k4y_A_cavity_3	8	4.365	0.5456	6	0	1	0	1	0	Liver carboxylesterase 1	NONE	P12337	Lipid transport and metabolism	NONE	NONE
2pnc_A_cavity_6	8	4.364	0.5455	4	1	1	1	1	0	Primary amine oxidase, liver isozyme	NONE	Q29437	Secondary metabolites biosynthesis, transport and catabolism	NONE	NONE
1ukc_B_cavity_1	9	4.906	0.5451	3	0	3	3	0	0	EstA	NONE	Q6ED33	Lipid transport and metabolism	NONE	NONE
1xp3_A_cavity_1	9	4.903	0.5448	3	1	2	2	1	0	Probable endonuclease 4	NONE	Q81LV1	NONE	NONE	NONE
1u2e_D_cavity_1	8	4.351	0.5438	5	1	1	0	1	0	2-hydroxy-6-oxononadienedioate/2-hydroxy-6-oxononatrienedioate hydrolase	NONE	P77044	NONE	NONE	NONE
1ysj_A_cavity_1	10	5.42	0.542	5	1	2	1	1	0	Uncharacterized hydrolase yxeP	NONE	P54955	NONE	NONE	NONE
2g2r_B_cavity_2	8	4.332	0.5415	4	2	1	1	0	0	Ig heavy chain Mem5	NONE	P84751	NONE	NONE	NONE
1x5f_A_cavity_1	8	4.328	0.541	5	1	1	0	1	0	Neogenin	NONE	Q92859	NONE	NONE	NONE
2jhe_B_cavity_1	8	4.316	0.5396	5	0	1	1	1	0	Transcriptional regulatory protein tyrR	NONE	P07604	NONE	NONE	NONE
1jh6_A_cavity_1	11	5.932	0.5393	5	1	2	0	3	0	Cyclic phosphodiesterase	NONE	O04147	Involved in cyclic-nucleotide phosphodiesterase activity	NONE	NONE
1o68_A_cavity_1	9	4.852	0.5391	5	0	2	2	0	0	3-methyl-2-oxobutanoate hydroxymethyltransferase	NONE	Q9JZW6	Catalyzes the reversible reaction in which hydroxymethyl group from 5,10-methylenetetrahydrofolate is tranferred onto alpha-ketoisovalerate to form ketopantoate.	NONE	NONE
2r6w_A_cavity_1	8	4.308	0.5386	4	1	1	2	0	0	Estrogen receptor	TRANSCRIPTION	ESR1_HUMAN	Nuclear hormone receptor. The steroid hormones and their receptors are involved in the regulation of eukaryotic gene expression and affect cellular proliferation and differentiation in target tissues.	NONE	Melanoma;Brain tumor;Inflammation;Myocardial infarction;Fibrosis;Brain ischemia;Psoriasis;Rheumatoid arthritis;Retinitis pigmentosa;Atherosclerosis;Genitourinary disease;Breast disease;Atrophy;Crohns disease;Testosterone deficiency;Uterine fibroids;Fibrocystic breast disease;Arthralgia;Prostatitis;Prostate hyperplasia;Inflammatory bowel disease;Solid tumor;Gynecological disorder;Vascular disease;…
1v9x_A_cavity_1	13	6.988	0.5375	5	1	3	0	4	0	Poly [ADP-ribose] polymerase 1	NONE	Q9ZP54	NONE	NONE	NONE
3din_C_cavity_7	8	4.3	0.5375	5	1	1	0	1	0	Protein translocase subunit secA	NONE	Q9X1R4	NONE	NONE	NONE
3eht_A_cavity_3	14	7.517	0.537	6	2	3	0	3	0	Maltose-binding periplasmic protein	NONE	P0AEX9	Carbohydrate transport and metabolism	NONE	NONE
2g6b_A_cavity_1	9	4.827	0.5363	4	1	2	1	1	0	Ras-related protein Rab-26	STRUCTURAL GENOMICS, UNKNOWN FUNCTION	RAB26_HUMAN	Participates in exocrine secretion: regulates the secretion of acinar granules in the parotid gland (By similarity).	NONE	NONE
1ggw_A_cavity_1	8	4.286	0.5358	7	0	1	0	0	0	Myosin regulatory light chain cdc4	NONE	Q09196	NONE	NONE	NONE
