# Supplementary material for: Network Pharmacology-Based Prediction and Verification of the Targets and Mechanism for Panax Notoginseng Saponins against Coronary Heart Disease
Source: Evid Based Complement Alternat Med. 2019 Jul 3;2019:6503752. doi: 10.1155/2019/6503752 (PMC6636530; doi:10.1155/2019/6503752)
Supplement: Supplementary Materials — The supplementary materials contain 5 files which are the top 300 potential targets of each compound predicted from Pharmmapper Server. [file 6503752.f1.zip › 6503752.f1/Ginsenoside Rg1.csv]

Ligand: MOL005341
Pharma Model	Num Feature	Fit	Norm Fit	Num Hydrophobic	Num HB Acceptor	Num HB Donor	Num Positive	Num Negative	Num Aromatic	Name	Class	Uniplot	Function	Disease	Idication
4zwb_A_cavity_3	4	3.87	0.9675	4	0	0	0	0	0	NONE	NONE	NONE	NONE	NONE	NONE
1sse_B_cavity_1	4	3.732	0.9329	4	0	0	0	0	0	AP-1-like transcription factor YAP1	NONE	P19880	NONE	NONE	NONE
2c9o_B_cavity_3	4	3.725	0.9313	4	0	0	0	0	0	RuvB-like 1	NONE	Q9Y265	NONE	NONE	NONE
2opx_A_cavity_3	4	3.673	0.9182	4	0	0	0	0	0	Lactaldehyde dehydrogenase	NONE	P25553	NONE	NONE	NONE
2k9p_A_cavity_1	4	3.606	0.9014	4	0	0	0	0	0	Pheromone alpha factor receptor	NONE	P06842	NONE	NONE	NONE
2gfp_B_cavity_5	4	3.579	0.8948	4	0	0	0	0	0	Multidrug resistance protein D	NONE	P31442	NONE	NONE	NONE
1jfi_A_cavity_1	4	3.538	0.8844	4	0	0	0	0	0	Dr1-associated corepressor	NONE	Q14919	NONE	NONE	NONE
1evy_A_cavity_3	4	3.526	0.8814	4	0	0	0	0	0	Glycerol-3-phosphate dehydrogenase [NAD+], glycosomal	NONE	P90551	Involved in oxidoreductase activity	NONE	NONE
1vb6_B_cavity_1	4	3.52	0.88	4	0	0	0	0	0	Heme-regulated cyclic AMP phosphodiesterase	NONE	P76129	Involved in signal transducer activity	NONE	NONE
1b8h_B_cavity_1	5	4.096	0.8191	5	0	0	0	0	0	DNA polymerase processivity component	NONE	O80164	NONE	NONE	NONE
2hmn_A_cavity_2	5	3.978	0.7957	3	0	1	0	1	0	Naphthalene 1,2-dioxygenase subunit alpha	NONE	P0A111	NONE	NONE	NONE
1fi6_A_cavity_2	5	3.97	0.794	5	0	0	0	0	0	RalBP1-associated Eps domain-containing protein 1	NONE	O54916	NONE	NONE	NONE
3fqd_A_cavity_8	5	3.907	0.7813	3	1	0	0	1	0	5-3 exoribonuclease 2	NONE	P40848	NONE	NONE	NONE
1nsh_B_cavity_1	5	3.852	0.7705	5	0	0	0	0	0	Protein S100-A11	NONE	P24480	NONE	NONE	NONE
2e7u_A_cavity_2	5	3.803	0.7605	4	1	0	0	0	0	Glutamate-1-semialdehyde 2,1-aminomutase	NONE	Q5SJS4	NONE	NONE	NONE
1wex_A_cavity_1	5	3.794	0.7589	4	1	0	0	0	0	Heterogeneous nuclear ribonucleoprotein L-like	NONE	Q921F4	NONE	NONE	NONE
3d3l_B_cavity_3	5	3.79	0.7581	3	0	1	0	1	0	Arachidonate 12-lipoxygenase, 12S-type	NONE	P18054	NONE	NONE	NONE
2h08_A_cavity_1	5	3.764	0.7528	5	0	0	0	0	0	Ribose-phosphate pyrophosphokinase 1	NONE	P60891	NONE	NONE	NONE
2fbw_Q_cavity_1	5	3.739	0.7478	5	0	0	0	0	0	Succinate dehydrogenase [ubiquinone] flavoprotein subunit, mitochondrial	NONE	Q9YHT1	NONE	NONE	NONE
1q78_A_cavity_5	5	3.724	0.7448	3	1	0	1	0	0	Poly(A) polymerase alpha	NONE	P25500	Involved in nucleotidyltransferase activity	NONE	NONE
3d47_B_cavity_3	5	3.724	0.7447	4	1	0	0	0	0	L-rhamnonate dehydratase	NONE	Q8ZNF9	NONE	NONE	NONE
1ahj_F_cavity_2	6	4.463	0.7439	6	0	0	0	0	0	Nitrile hydratase subunit alpha	NONE	P13448	NONE	NONE	NONE
2e9q_A_cavity_2	5	3.717	0.7435	5	0	0	0	0	0	11S globulin subunit beta	NONE	P13744	NONE	NONE	NONE
1l0v_P_cavity_2	5	3.709	0.7418	5	0	0	0	0	0	Fumarate reductase flavoprotein subunit	OXIDOREDUCTASE	FRDA_ECOLI	Two distinct, membrane-bound, FAD-containing enzymes are responsible for the catalysis of fumarate and succinate interconversion; the fumarate reductase is used in anaerobic growth, and the succinate dehydrogenase is used in aerobic growth.	NONE	NONE
1sfk_D_cavity_1	5	3.7	0.74	5	0	0	0	0	0	Genome polyprotein	NONE	P14335	NONE	NONE	NONE
2dgu_A_cavity_2	5	3.678	0.7356	3	1	0	0	1	0	Heterogeneous nuclear ribonucleoprotein Q	NONE	O60506	NONE	NONE	NONE
1iq3_A_cavity_1	5	3.675	0.735	5	0	0	0	0	0	RalBP1-associated Eps domain-containing protein 2	NONE	Q8NFH8	NONE	NONE	NONE
1i3r_H_cavity_2	5	3.672	0.7345	4	1	0	0	0	0	H-2 class II histocompatibility antigen, E-K alpha chain	NONE	P04224	NONE	NONE	NONE
1r8u_A_cavity_1	5	3.584	0.7168	5	0	0	0	0	0	Cbp/p300-interacting transactivator 2	TRANSCRIPTION/TRANSCRIPTION ACTIVATOR	CITE2_HUMAN	Interferes with the binding of transcription factors HIF-1a and STAT2 to p300/CBP.	NONE	NONE
1b0a_A_cavity_2	5	3.581	0.7162	5	0	0	0	0	0	Bifunctional protein folD	NONE	P24186	NONE	NONE	NONE
3b6x_B_cavity_1	5	3.565	0.7131	5	0	0	0	0	0	General odorant-binding protein lush	NONE	O02372	Involved in odorant binding	NONE	NONE
2gj3_B_cavity_1	5	3.557	0.7114	5	0	0	0	0	0	Nitrogen fixation regulatory protein	NONE	P30663	NONE	NONE	NONE
2uvn_B_cavity_3	5	3.539	0.7077	4	1	0	0	0	0	Putative cytochrome P450 130	NONE	Q11062	NONE	NONE	NONE
2nq5_A_cavity_5	5	3.53	0.7061	4	1	0	0	0	0	5-methyltetrahydropteroyltriglutamate--homocysteine methyltransferase	NONE	Q8CWX6	NONE	NONE	NONE
3boa_A_cavity_7	5	3.518	0.7035	3	0	1	1	0	0	Protein disulfide-isomerase	NONE	P17967	NONE	NONE	NONE
1n6b_A_cavity_1	5	3.517	0.7033	5	0	0	0	0	0	Cytochrome P450 2C5	NONE	P00179	Involved in monooxygenase activity	NONE	NONE
2bty_A_cavity_1	5	3.506	0.7012	5	0	0	0	0	0	Acetylglutamate kinase	NONE	Q9X2A4	NONE	NONE	NONE
1so0_C_cavity_2	5	3.503	0.7007	3	0	1	0	1	0	Aldose 1-epimerase	NONE	Q96C23	NONE	NONE	NONE
1vrn_C_cavity_3	5	3.497	0.6995	5	0	0	0	0	0	Photosynthetic reaction center cytochrome c subunit	NONE	P07173	NONE	NONE	NONE
1lpj_A_cavity_1	6	4.156	0.6926	3	0	2	1	0	0	Retinoid-binding protein 7	NONE	Q96R05	Involved in retinoid binding	NONE	For the treatment of vitamin A deficiency.
3c7g_A_cavity_3	6	4.006	0.6677	4	1	0	1	0	0	Arabinoxylan arabinofuranohydrolase	NONE	Q45071	NONE	NONE	NONE
1tg6_A_cavity_2	6	3.985	0.6642	4	1	0	0	1	0	Putative ATP-dependent Clp protease proteolytic subunit, mitochondrial	HYDROLASE	CLPP_HUMAN	Clp cleaves peptides in various proteins in a process that requires ATP hydrolysis. Clp may be responsible for a fairly general and central housekeeping function rather than for the degradation of specific substrates.	NONE	NONE
2nqb_G_cavity_1	6	3.969	0.6616	6	0	0	0	0	0	Histone H3	NONE	P02299	NONE	NONE	NONE
1hj1_A_cavity_1	6	3.944	0.6574	4	1	0	1	0	0	Estrogen receptor beta	NONE	Q62986	Involved in transcription factor activity	NONE	NONE
3bm4_A_cavity_1	6	3.914	0.6524	5	1	0	0	0	0	ADP-sugar pyrophosphatase	NONE	Q9UKK9	NONE	NONE	NONE
2vlg_C_cavity_1	6	3.909	0.6514	4	0	1	0	1	0	Sporulation kinase A	NONE	P16497	NONE	NONE	NONE
1b4u_B_cavity_1	6	3.908	0.6513	4	0	1	0	1	0	Protocatechuate 4,5-dioxygenase alpha chain	NONE	P22635	NONE	NONE	NONE
1p32_C_cavity_1	6	3.905	0.6508	3	0	1	2	0	0	Complement component 1 Q subcomponent-binding protein, mitochondrial	NONE	Q07021	NONE	NONE	NONE
1x65_A_cavity_1	6	3.904	0.6506	4	1	0	0	1	0	Cold shock domain-containing protein E1	NONE	O75534	NONE	NONE	NONE
2k2q_A_cavity_2	6	3.895	0.6492	5	1	0	0	0	0	Tyrocidine synthetase 3	NONE	O30409	NONE	NONE	NONE
2hyd_A_cavity_2	6	3.891	0.6485	6	0	0	0	0	0	Putative multidrug export ATP-binding/permease protein SAV1866	NONE	Q99T13	NONE	NONE	NONE
2in5_A_cavity_2	6	3.89	0.6483	2	0	2	0	2	0	Uncharacterized lipoprotein gfcB	NONE	P75884	NONE	NONE	NONE
2f66_E_cavity_1	6	3.89	0.6483	6	0	0	0	0	0	Suppressor protein STP22 of temperature-sensitive alpha-factor receptor and arginine permease	NONE	P25604	NONE	NONE	NONE
1wru_A_cavity_3	6	3.815	0.6359	4	0	1	1	0	0	Baseplate protein	NONE	P08558	NONE	NONE	NONE
2p06_A_cavity_1	6	3.812	0.6353	5	0	1	0	0	0	Uncharacterized protein AF_0060	NONE	O30176	NONE	NONE	NONE
2rmr_A_cavity_1	6	3.805	0.6341	5	1	0	0	0	0	Paired amphipathic helix protein Sin3a	NONE	Q60520	NONE	NONE	NONE
3epz_B_cavity_1	6	3.794	0.6324	2	1	2	1	0	0	DNA (cytosine-5)-methyltransferase 1	NONE	P26358	NONE	NONE	NONE
1h9t_A_cavity_3	6	3.793	0.6322	5	0	1	0	0	0	Fatty acid metabolism regulator protein	NONE	P0A8V6	NONE	NONE	NONE
2acm_B_cavity_1	7	4.411	0.6301	6	1	0	0	0	0	Mucin-1	NONE	P15941	NONE	NONE	NONE
1yf6_L_cavity_3	6	3.772	0.6287	4	1	0	1	0	0	Reaction center protein H chain	NONE	P0C0Y7	NONE	NONE	NONE
1e3z_A_cavity_3	6	3.771	0.6285	2	1	2	1	0	0	Alpha-amylase	NONE	P00692	NONE	NONE	NONE
1ml8_A_cavity_1	6	3.769	0.6281	6	0	0	0	0	0	Protein yhfA	NONE	P0ADX3	NONE	NONE	NONE
1ma1_A_cavity_1	6	3.749	0.6249	5	1	0	0	0	0	Superoxide dismutase [Fe]	NONE	P18868	NONE	NONE	NONE
1in7_A_cavity_2	6	3.732	0.6221	2	3	0	0	1	0	Holliday junction ATP-dependent DNA helicase ruvB	NONE	Q56313	Involved in nucleotide binding	NONE	NONE
2zfu_B_cavity_1	7	4.354	0.622	4	0	2	1	0	0	Ribosomal RNA-processing protein 8	NONE	O43159	NONE	NONE	NONE
1b5l_A_cavity_1	6	3.723	0.6206	2	2	1	0	1	0	Interferon tau-1	NONE	P56828	NONE	NONE	NONE
1dos_A_cavity_1	6	3.711	0.6185	4	1	0	1	0	0	Fructose-bisphosphate aldolase class 2	NONE	P0AB71	Carbohydrate transport and metabolism	NONE	NONE
2uxy_A_cavity_2	6	3.709	0.6181	4	0	2	0	0	0	Aliphatic amidase	NONE	P11436	NONE	NONE	NONE
2czy_A_cavity_1	6	3.708	0.618	6	0	0	0	0	0	Paired amphipathic helix protein Sin3b	NONE	Q62141	NONE	NONE	NONE
1ukf_A_cavity_1	6	3.696	0.616	4	1	0	0	1	0	Cysteine protease avirulence protein avrPphB	NONE	Q52430	NONE	NONE	NONE
2ka5_A_cavity_1	6	3.693	0.6154	4	0	1	0	1	0	Putative anti-sigma factor antagonist TM_1081	NONE	Q9X0H0	NONE	NONE	NONE
1ako_A_cavity_1	6	3.679	0.6131	4	2	0	0	0	0	Exodeoxyribonuclease III	NONE	P09030	NONE	NONE	NONE
1zag_D_cavity_1	6	3.673	0.6121	4	1	0	1	0	0	Zinc-alpha-2-glycoprotein	LIPID MOBILIZATION FACTOR	ZA2G_HUMAN	Stimulates lipid degradation in adipocytes and causes the extensive fat losses associated with some advanced cancers. May bind polyunsaturated fatty acids.	NONE	NONE
2ohv_A_cavity_2	6	3.665	0.6108	2	1	1	1	1	0	Glutamate racemase	NONE	Q9A1B7	NONE	NONE	NONE
2hka_C_cavity_1	6	3.656	0.6094	6	0	0	0	0	0	Epididymal secretory protein E1	NONE	P79345	NONE	NONE	NONE
2ccy_A_cavity_1	6	3.649	0.6082	5	0	0	0	1	0	Cytochrome c	NONE	P00152	NONE	NONE	NONE
1sgm_B_cavity_1	6	3.636	0.606	4	1	0	1	0	0	Uncharacterized HTH-type transcriptional regulator yxaF	NONE	P42105	NONE	NONE	NONE
2jul_A_cavity_2	6	3.63	0.6051	6	0	0	0	0	0	Calsenilin	NONE	Q9QXT8	NONE	NONE	NONE
3h1h_S_cavity_1	6	3.628	0.6047	2	2	1	1	0	0	Cytochrome b	NONE	P18946	NONE	NONE	NONE
1wjt_A_cavity_1	6	3.627	0.6046	6	0	0	0	0	0	Transcription elongation factor A protein 3	NONE	P23881	NONE	NONE	NONE
2z5f_A_cavity_1	6	3.622	0.6037	3	1	1	0	1	0	Sulfotransferase family cytosolic 1B member 1	TRANSFERASE	ST1B1_HUMAN	Catalyzes the sulfate conjugation of many hormones, neurotransmitters, drugs and xenobiotic compounds. Sulfonation increases the water solubility of most compounds, and therefore their renal excretion, but it can also result in bioactivation to form activ	NONE	NONE
2d5v_A_cavity_1	6	3.622	0.6037	3	1	1	0	1	0	Hepatocyte nuclear factor 6	NONE	P70512	NONE	NONE	NONE
1twu_A_cavity_1	6	3.612	0.602	5	1	0	0	0	0	Uncharacterized protein yycE	NONE	P37479	NONE	NONE	NONE
1rso_A_cavity_1	6	3.604	0.6006	5	1	0	0	0	0	Disks large homolog 1	NONE	Q62696	NONE	NONE	NONE
2pla_B_cavity_1	6	3.601	0.6002	2	4	0	0	0	0	Glycerol-3-phosphate dehydrogenase 1-like protein	NONE	Q8N335	NONE	NONE	NONE
2fxt_A_cavity_1	6	3.6	0.6	5	1	0	0	0	0	Mitochondrial import inner membrane translocase subunit TIM44	NONE	Q01852	NONE	NONE	NONE
1l3g_A_cavity_1	6	3.6	0.6	3	2	0	0	1	0	Transcription factor MBP1	NONE	P39678	NONE	NONE	NONE
2au3_A_cavity_3	6	3.599	0.5999	3	1	1	0	1	0	DNA primase	NONE	O67465	NONE	NONE	NONE
3epm_B_cavity_2	6	3.597	0.5995	4	1	0	1	0	0	Thiamine biosynthesis protein thiC	NONE	Q9A6Q5	NONE	NONE	NONE
1wh0_A_cavity_1	6	3.593	0.5988	4	0	1	0	1	0	Ubiquitin carboxyl-terminal hydrolase 19	HYDROLASE	UBP19_HUMAN	Involved in the ubiquitin-dependent proteolytic pathway in conjunction with the 26S proteasome (By similarity).	NONE	NONE
1qi9_A_cavity_4	6	3.592	0.5986	3	1	2	0	0	0	Vanadium haloperoxidase	NONE	P81701	Involved in catalytic activity	NONE	NONE
2qnc_B_cavity_2	6	3.589	0.5982	6	0	0	0	0	0	Recombination endonuclease VII	NONE	P13340	NONE	NONE	NONE
1p4t_A_cavity_2	6	3.587	0.5978	5	1	0	0	0	0	Surface protein A	NONE	Q9RP17	Involved in porin activity	NONE	NONE
1n97_A_cavity_2	7	4.184	0.5977	6	1	0	0	0	0	Cytochrome P450	NONE	Q746J6	Involved in monooxygenase activity	NONE	NONE
1vrb_B_cavity_3	6	3.585	0.5975	3	2	0	0	1	0	Uncharacterized protein yxbC	NONE	P46327	NONE	NONE	NONE
3cf3_B_cavity_8	6	3.581	0.5968	1	1	3	1	0	0	Transitional endoplasmic reticulum ATPase	NONE	Q01853	Involved in nucleotide binding	NONE	NONE
1yf2_B_cavity_6	6	3.563	0.5938	5	0	1	0	0	0	Type-1 restriction enzyme MjaXIP specificity protein	NONE	Q57594	NONE	NONE	NONE
1s40_A_cavity_2	6	3.562	0.5937	4	1	0	0	1	0	Cell division control protein 13	NONE	P32797	NONE	NONE	NONE
1e5q_D_cavity_4	6	3.557	0.5929	3	1	1	1	0	0	Saccharopine dehydrogenase [NADP+, L-glutamate-forming]	NONE	Q9P4R4	Amino acid transport and metabolism	NONE	NONE
1v5w_B_cavity_1	7	4.147	0.5925	4	0	1	2	0	0	Meiotic recombination protein DMC1/LIM15 homolog	NONE	Q14565	NONE	NONE	NONE
1fdy_B_cavity_2	6	3.549	0.5916	6	0	0	0	0	0	N-acetylneuraminate lyase	NONE	P0A6L4	Catalyzes the reversible aldol cleavage of N-acetylneuraminic acid (sialic acid; Neu5Ac) to form pyruvate and N-acetylmannosamine (ManNAc) via a Schiff base intermediate.	NONE	NONE
1f0x_A_cavity_2	6	3.548	0.5913	3	1	2	0	0	0	D-lactate dehydrogenase	OXIDOREDUCTASE	DLD_ECOLI	First component of the membrane-bound D-lactate oxidase, which is believed to play an important role in the energization of the active transport of a variety of sugars and amino acids.	NONE	NONE
2gk9_A_cavity_2	6	3.546	0.5911	6	0	0	0	0	0	Phosphatidylinositol-5-phosphate 4-kinase type-2 gamma	NONE	Q8TBX8	NONE	NONE	NONE
1to6_A_cavity_3	6	3.541	0.5902	6	0	0	0	0	0	Glycerate kinase	NONE	P57098	NONE	NONE	NONE
2aao_A_cavity_1	6	3.539	0.5899	6	0	0	0	0	0	Calcium-dependent protein kinase 1	NONE	Q06850	NONE	NONE	NONE
1wjp_A_cavity_1	7	4.126	0.5894	4	1	1	0	1	0	Zinc finger protein 295	NONE	Q9ULJ3	NONE	NONE	NONE
2j91_B_cavity_4	6	3.534	0.5891	3	0	2	1	0	0	Adenylosuccinate lyase	NONE	P30566	NONE	NONE	NONE
2a98_A_cavity_2	8	4.706	0.5883	4	0	2	2	0	0	Inositol-trisphosphate 3-kinase C	NONE	Q96DU7	NONE	NONE	NONE
3dh4_D_cavity_3	6	3.526	0.5877	6	0	0	0	0	0	Sodium/glucose cotransporter	TRANSPORT PROTEIN	SGLT_VIBPA	Actively transports glucose into cells by Na(+) cotransport (By similarity).	NONE	Diabetes mellitus;Non-insulin dependent diabetes;Obesity
1vly_A_cavity_1	6	3.525	0.5875	2	1	1	0	2	0	tRNA-modifying protein ygfZ	NONE	P0ADE8	NONE	NONE	NONE
2d8h_A_cavity_1	6	3.523	0.5872	2	1	1	1	1	0	SH3 domain-containing YSC84-like protein 1	NONE	Q96HL8	NONE	NONE	NONE
1yvw_A_cavity_1	6	3.519	0.5865	6	0	0	0	0	0	Phosphoribosyl-ATP pyrophosphatase	NONE	Q81G00	NONE	NONE	NONE
2daf_A_cavity_2	7	4.103	0.5862	5	1	0	0	1	0	IQ and ubiquitin-like domain-containing protein	NONE	Q8NA54	NONE	NONE	NONE
2apo_A_cavity_1	6	3.517	0.5862	4	1	0	0	1	0	Probable tRNA pseudouridine synthase B	NONE	Q57612	NONE	NONE	NONE
1yix_A_cavity_1	8	4.686	0.5857	5	1	1	1	0	0	Uncharacterized deoxyribonuclease ycfH	NONE	P0AFQ7	NONE	NONE	NONE
1xvp_A_cavity_1	6	3.513	0.5854	5	0	1	0	0	0	Nuclear receptor subfamily 1 group I member 3	DNA BINDING PROTEIN	NR1I3_HUMAN	Binds and transactivates the retinoic acid response elements that control expression of the retinoic acid receptor beta 2 and alcohol dehydrogenase 3 genes. Transactivates both the phenobarbital responsive element module of the human CYP2B6 gene and the C	NONE	NONE
1u63_C_cavity_2	7	4.091	0.5844	5	0	1	1	0	0	50S ribosomal protein L1P	NONE	P54050	Translation, ribosomal structure and biogenesis	NONE	NONE
2cls_B_cavity_1	8	4.665	0.5832	2	3	1	2	0	0	Rho-related GTP-binding protein Rho6	NONE	Q92730	NONE	NONE	NONE
2rkj_J_cavity_2	6	3.493	0.5822	5	0	1	0	0	0	Tyrosyl-tRNA synthetase, mitochondrial	NONE	P12063	NONE	NONE	NONE
1uaa_B_cavity_3	7	4.075	0.5821	4	0	2	1	0	0	ATP-dependent DNA helicase rep	NONE	P09980	NONE	NONE	NONE
2a7s_A_cavity_3	6	3.49	0.5817	6	0	0	0	0	0	Probable propionyl-CoA carboxylase beta chain 5	NONE	P96885	NONE	NONE	NONE
2ex8_A_cavity_3	6	3.49	0.5816	3	2	0	0	1	0	D-alanyl-D-alanine carboxypeptidase dacB	NONE	P24228	NONE	NONE	NONE
2fvl_B_cavity_1	7	4.057	0.5796	4	2	0	0	1	0	Aldo-keto reductase family 1 member C4	NONE	P17516	NONE	NONE	NONE
2iuk_B_cavity_1	7	4.026	0.5752	5	1	0	1	0	0	Seed lipoxygenase	NONE	P24095	NONE	NONE	NONE
1yiv_A_cavity_1	8	4.573	0.5716	4	2	0	2	0	0	Myelin P2 protein	NONE	P0C6G6	NONE	NONE	NONE
2j47_A_cavity_1	7	3.995	0.5707	3	1	1	0	2	0	O-GlcNAcase BT_4395	NONE	Q89ZI2	NONE	NONE	NONE
1wxr_A_cavity_2	8	4.545	0.5681	4	1	1	2	0	0	Hemoglobin-binding protease hbp	NONE	O88093	NONE	NONE	NONE
1j7x_A_cavity_3	7	3.97	0.5672	4	1	1	1	0	0	Retinol-binding protein 3	NONE	Q7SZI7	NONE	NONE	NONE
2qtv_A_cavity_6	7	3.965	0.5664	3	1	1	0	2	0	Protein transport protein SEC23	NONE	P15303	NONE	NONE	NONE
2r55_A_cavity_1	7	3.96	0.5657	4	1	1	1	0	0	StAR-related lipid transfer protein 5	NONE	Q9NSY2	NONE	NONE	NONE
2zs0_C_cavity_1	8	4.522	0.5652	6	1	0	0	1	0	Extracellular giant hemoglobin major globin subunit A1	NONE	Q7M419	NONE	NONE	NONE
2da7_A_cavity_1	7	3.946	0.5637	3	1	1	0	2	0	Zinc finger E-box-binding homeobox 2	NONE	O60315	NONE	NONE	NONE
1ycd_A_cavity_2	7	3.94	0.5629	4	0	2	1	0	0	Family of serine hydrolases 1	NONE	P38777	NONE	NONE	NONE
1onq_C_cavity_1	7	3.94	0.5628	4	1	1	0	1	0	T-cell surface glycoprotein CD1a	IMMUNE SYSTEM	CD1A_HUMAN	Antigen-presenting protein that binds self and non-self lipid and glycolipid antigens and presents them to T-cell receptors on natural killer T-cells.	NONE	NONE
3fz7_F_cavity_2	7	3.929	0.5612	5	0	1	1	0	0	Glutamate decarboxylase beta	NONE	P69910	NONE	NONE	NONE
1me7_A_cavity_4	7	3.909	0.5585	5	1	1	0	0	0	Inosine-5-monophosphate dehydrogenase	NONE	P50097	Nucleotide transport and metabolism	NONE	For the prophylaxis of organ rejection in patients receiving allogeneic renal transplants, administered in combination with cyclosporine and corticosteroids.
2vwt_A_cavity_1	9	5.007	0.5563	6	2	0	0	1	0	2-keto-3-deoxy-L-rhamnonate aldolase	NONE	P76469	NONE	NONE	NONE
1bin_B_cavity_1	7	3.887	0.5553	6	0	0	0	1	0	Leghemoglobin A	NONE	P02238	Involved in iron ion binding	NONE	NONE
1s5a_A_cavity_1	7	3.883	0.5547	3	1	1	2	0	0	Hypothetical protein yesE	NONE	O31511	NONE	NONE	NONE
1q8b_A_cavity_1	7	3.882	0.5546	4	0	1	1	1	0	Uncharacterized protein yjcS	NONE	O31641	NONE	NONE	NONE
1jcn_A_cavity_1	7	3.882	0.5546	4	1	1	1	0	0	Inosine-5-monophosphate dehydrogenase 1	OXIDOREDUCTASE	IMDH1_HUMAN	Rate limiting enzyme in the de novo synthesis of guanine nucleotides and therefore is involved in the regulation of cell growth. It may also have a role in the development of malignancy and the growth progression of some tumors.	Defects in IMPDH1 are the cause of retinitis pigmentosa type 10 (RP10) [MIM:180105]. RP leads to degeneration of retinal photoreceptor cells. Patients typically have night vision blindness and loss of midperipheral visual field. As their condition progresses, they lose their far peripheral visual field and eventually central vision as well. RP10 inheritance is autosomal dominant.	NONE
2hh8_A_cavity_1	7	3.878	0.554	3	1	1	1	1	0	Uncharacterized protein ydfO	NONE	P76156	NONE	NONE	NONE
1sjw_A_cavity_1	8	4.428	0.5535	5	0	2	1	0	0	Nogalonic acid methyl ester cyclase	NONE	Q9RN59	NONE	NONE	NONE
2zcu_A_cavity_2	7	3.864	0.5521	5	0	1	1	0	0	Uncharacterized oxidoreductase ytfG	NONE	P39315	NONE	NONE	NONE
2c62_A_cavity_1	7	3.852	0.5503	5	1	0	1	0	0	Activated RNA polymerase II transcriptional coactivator p15	NONE	P53999	NONE	NONE	NONE
2hcb_B_cavity_2	7	3.85	0.55	4	0	2	0	1	0	Chromosomal replication initiator protein dnaA	NONE	O66659	Involved in nucleotide binding	NONE	NONE
2c96_A_cavity_1	8	4.397	0.5497	5	2	0	0	1	0	Psp operon transcriptional activator	NONE	P37344	NONE	NONE	NONE
3bom_B_cavity_1	7	3.841	0.5488	6	0	0	0	1	0	Hemoglobin subunit alpha-4	NONE	P14527	NONE	NONE	NONE
3b9k_D_cavity_1	7	3.84	0.5486	6	0	1	0	0	0	T-cell surface glycoprotein CD8 alpha chain	NONE	P01731	NONE	NONE	NONE
2f4n_C_cavity_1	9	4.934	0.5482	3	1	2	3	0	0	Uncharacterized protein MJ1651	NONE	Q59045	NONE	NONE	NONE
1q23_H_cavity_1	7	3.831	0.5473	7	0	0	0	0	0	Chloramphenicol acetyltransferase	NONE	P62580	Involved in chloramphenicol O-acetyltransferase activity	NONE	For the treatment of bacterial infections.
1xdt_T_cavity_3	7	3.816	0.5451	5	0	1	1	0	0	Proheparin-binding EGF-like growth factor	COMPLEX (TOXIN/GROWTH FACTOR)	HBEGF_HUMAN	May be involved in macrophage-mediated cellular proliferation. It is mitogenic for fibroblasts and smooth muscle but not endothelial cells. It is able to bind EGF receptors with higher affinity than EGF itself and is a far more potent mitogen for smooth m	NONE	NONE
1js6_B_cavity_2	7	3.809	0.5442	7	0	0	0	0	0	Aromatic-L-amino-acid decarboxylase	NONE	P80041	Catalyzes the decarboxylation of L-3,4-dihydroxyphenylalanine (DOPA) to dopamine, L-5-hydroxytryptophan to serotonin and L-tryptophan to tryptamine.	NONE	NONE
6req_D_cavity_1	7	3.809	0.5441	4	2	0	0	1	0	Methylmalonyl-CoA mutase large subunit	NONE	P11653	NONE	NONE	NONE
1z45_A_cavity_4	7	3.808	0.544	3	0	2	2	0	0	GAL10 bifunctional protein [Includes: UDP-glucose 4-epimerase	NONE	P04397	Cell wall/membrane/envelope biogenesis	NONE	NONE
1lss_B_cavity_1	7	3.803	0.5433	7	0	0	0	0	0	Trk system potassium uptake protein trkA homolog	NONE	Q58505	Involved in cation transmembrane transporter activity	NONE	NONE
3cb4_F_cavity_4	8	4.336	0.542	6	1	1	0	0	0	GTP-binding protein lepA	NONE	P60785	NONE	NONE	NONE
1qls_A_cavity_1	7	3.787	0.541	7	0	0	0	0	0	Annexin A1	COMPLEX (LIGAND/ANNEXIN)	ANXA1_HUMAN	Calcium/phospholipid-binding protein which promotes membrane fusion and is involved in exocytosis. This protein regulates phospholipase A2 activity. It seems to bind from two to four calcium ions with high affinity.	NONE	Cancer
2oyn_A_cavity_2	7	3.786	0.5408	4	1	1	1	0	0	Riboflavin kinase	NONE	Q60365	NONE	NONE	NONE
2vdg_A_cavity_1	7	3.785	0.5408	4	2	0	0	1	0	Aldose reductase	NONE	P23901	NONE	NONE	NONE
3gan_A_cavity_1	7	3.778	0.5398	5	0	2	0	0	0	Uncharacterized protein At3g22680	NONE	Q9LUJ3	NONE	NONE	NONE
2veq_A_cavity_5	8	4.311	0.5389	4	1	1	0	2	0	Centromere DNA-binding protein complex CBF3 subunit B	NONE	P40969	NONE	NONE	NONE
3dwl_D_cavity_1	7	3.772	0.5388	6	0	0	0	1	0	Actin-related protein 3	NONE	P32390	NONE	NONE	NONE
2i7x_A_cavity_1	7	3.77	0.5386	4	1	1	1	0	0	Cleavage and polyadenylation specificity factor subunit 3	RNA BINDING PROTEIN, PROTEIN BINDING	CPSF3_HUMAN	Component of the cleavage and polyadenylation specificity factor (CPSF) complex that play a key role in pre-mRNA 3-end formation, recognizing the AAUAAA signal sequence and interacting with poly(A) polymerase and other factors to bring about cleavage and	NONE	NONE
3cz8_B_cavity_3	7	3.766	0.538	6	1	0	0	0	0	Putative sporulation-specific glycosylase ydhD	NONE	O05495	NONE	NONE	NONE
1vlu_B_cavity_1	7	3.762	0.5374	6	1	0	0	0	0	Gamma-glutamyl phosphate reductase	NONE	P54885	NONE	NONE	NONE
1eyr_A_cavity_1	7	3.76	0.5372	6	0	1	0	0	0	N-acylneuraminate cytidylyltransferase	NONE	P0A0Z8	Cell wall/membrane/envelope biogenesis	NONE	NONE
1ll0_A_cavity_1	7	3.759	0.537	6	1	0	0	0	0	Glycogenin-1	NONE	P13280	Involved in transferase activity, transferring hexosyl groups	NONE	NONE
2yw2_A_cavity_3	7	3.748	0.5355	3	0	2	1	1	0	Phosphoribosylamine--glycine ligase	NONE	O66949	NONE	NONE	NONE
1qca_A_cavity_1	7	3.747	0.5353	7	0	0	0	0	0	Chloramphenicol acetyltransferase 3	NONE	P00484	Involved in chloramphenicol O-acetyltransferase activity	NONE	Used in treatment of cholera, as it destroys the vibrios and decreases the diarrhea. It is effective against tetracycline-resistant vibrios. It is also used in eye drops or ointment to treat bacterial conjunctivitis.
3bxj_A_cavity_2	7	3.746	0.5351	4	2	0	1	0	0	Ras GTPase-activating protein SynGAP	NONE	Q9QUH6	NONE	NONE	NONE
2cyc_A_cavity_1	7	3.744	0.5348	5	0	1	1	0	0	Tyrosyl-tRNA synthetase	NONE	O58739	NONE	NONE	NONE
3fwz_B_cavity_1	7	3.74	0.5342	6	0	1	0	0	0	Inner membrane protein ybaL	NONE	P39830	NONE	NONE	NONE
2pgh_B_cavity_1	8	4.271	0.5338	6	0	1	0	1	0	Hemoglobin subunit alpha	NONE	P01965	NONE	NONE	NONE
1a57_A_cavity_1	9	4.799	0.5332	5	1	1	2	0	0	Fatty acid-binding protein, intestinal	NONE	P02693	Involved in transporter activity	NONE	NONE
2ysw_C_cavity_1	8	4.266	0.5332	4	2	0	1	1	0	3-dehydroquinate dehydratase	NONE	O66440	NONE	NONE	NONE
1or6_B_cavity_1	7	3.711	0.5302	5	1	0	1	0	0	Heme-based aerotactic transducer hemAT	NONE	O07621	Involved in signal transducer activity	NONE	NONE
1ith_B_cavity_1	8	4.239	0.5299	6	1	0	0	1	0	Hemoglobin F-I	NONE	P06148	NONE	NONE	NONE
2hzv_C_cavity_1	7	3.705	0.5293	5	2	0	0	0	0	Nickel-responsive regulator	NONE	P0A6Z6	NONE	NONE	NONE
2vwe_L_cavity_2	7	3.705	0.5293	3	0	2	2	0	0	Vascular endothelial growth factor B	NONE	P49765	NONE	NONE	NONE
3brp_A_cavity_2	7	3.704	0.5291	4	0	2	1	0	0	C-phycocyanin alpha chain	NONE	P00306	NONE	NONE	NONE
1x6v_B_cavity_2	9	4.761	0.529	7	1	0	0	1	0	Bifunctional 3-phosphoadenosine 5-phosphosulfate synthetase 1	NONE	O43252	Involved in ATP binding	NONE	NONE
1e29_A_cavity_1	7	3.702	0.5289	6	1	0	0	0	0	Cytochrome c-550	NONE	Q55013	NONE	NONE	NONE
2bcg_G_cavity_1	7	3.702	0.5289	7	0	0	0	0	0	Rab GDP-dissociation inhibitor	NONE	P39958	NONE	NONE	NONE
1b0n_B_cavity_1	7	3.698	0.5283	6	1	0	0	0	0	HTH-type transcriptional regulator sinR	NONE	P06533	NONE	NONE	NONE
1n60_B_cavity_2	7	3.691	0.5272	5	2	0	0	0	0	Carbon monoxide dehydrogenase small chain	NONE	P19921	NONE	NONE	NONE
2vas_A_cavity_5	7	3.69	0.5271	4	1	1	0	1	0	Myosin-VI	NONE	Q29122	NONE	NONE	NONE
3b68_A_cavity_1	7	3.689	0.527	5	0	1	0	1	0	Androgen receptor	TRANSCRIPTION	ANDR_HUMAN	Steroid hormone receptors are ligand-activated transcription factors that regulate eukaryotic gene expression and affect cellular proliferation and differentiation in target tissues. Transcription factor activity is modulated by bound coactivator and core	Genetic variation in AR can be responsible of androgenetic alopecia (AGA) [MIM:109200].;Defects in AR are the cause of androgen insensibility syndrome (AIS) [MIM:300068]; previously known as testicular feminization syndrome (TFM). It can be complete (CAIS) when external genitalia are phenotypically female; or partial (PAIS) when external genitalia are substantively ambiguous or mild (MAIS) when e…	Hypoactive sexual desire disorder;Hepatitis B virus infection;Cardiac failure;Andrology;Hirsutism;Female sexual dysfunction;Psoriasis;Reperfusion injury;Plasmodium infection;Atherosclerosis;Prostate hyperplasia;Fatigue;Male sexual dysfunction;Autoimmune disease;Testosterone deficiency;Uterine fibroids;Metabolic disorder;Myalgia;Obesity;Gynecological disorder;Contraception;Cancer;Hypercholesterole…
2ii4_B_cavity_2	7	3.683	0.5261	5	2	0	0	0	0	Lipoamide acyltransferase component of branched-chain alpha-keto acid dehydrogenase complex, mitochondrial	NONE	P11181	NONE	NONE	NONE
1nj8_D_cavity_2	7	3.677	0.5254	4	1	1	1	0	0	Prolyl-tRNA synthetase	NONE	Q58635	NONE	NONE	NONE
3bkb_A_cavity_2	7	3.677	0.5253	3	2	1	0	1	0	Proto-oncogene tyrosine-protein kinase Fes/Fps	TRANSFERASE	FES_HUMAN	NONE	NONE	NONE
1ya0_B_cavity_2	7	3.675	0.5251	5	1	1	0	0	0	Protein SMG7	NONE	Q92540	NONE	NONE	NONE
3epy_B_cavity_3	7	3.675	0.525	6	1	0	0	0	0	Acyl-CoA-binding domain-containing protein 7	NONE	Q8N6N7	NONE	NONE	NONE
1aq0_B_cavity_1	7	3.673	0.5247	6	0	0	1	0	0	Lichenase-2	NONE	P12257	Involved in hydrolase activity, hydrolyzing O-glycosyl compounds	NONE	NONE
1ord_B_cavity_3	8	4.196	0.5245	6	1	0	0	1	0	Ornithine decarboxylase, inducible	NONE	P43099	Amino acid transport and metabolism	NONE	NONE
1qib_A_cavity_1	8	4.194	0.5243	4	1	1	2	0	0	72 kDa type IV collagenase	HYDROLASE	MMP2_HUMAN	In addition to gelatin and collagens, it cleaves KiSS1 at a Gly-	-Leu bond.	Defects in MMP2 are the cause of multicentric osteolysis nodulosis and arthropathy (MONA) [MIM:605156]. Inherited osteolyses or vanishing bone syndromes are rare disorders of unknown etiology characterized by destruction and resorption of affected bones. MONA is an autosomal recessive osteolysis with multicentric involvement characterized by carpal and tarsal resorption, crippling arthritic chang…	NONE
1mba_A_cavity_1	7	3.67	0.5243	6	0	0	0	1	0	Globin	NONE	P02210	Involved in iron ion binding	NONE	NONE
2k8y_A_cavity_1	7	3.665	0.5235	6	1	0	0	0	0	Uncharacterized protein MJ0187	NONE	Q57646	NONE	NONE	NONE
1xa8_B_cavity_1	9	4.71	0.5233	5	1	1	0	2	0	Glutathione-dependent formaldehyde-activating enzyme	NONE	Q51669	Catalyzes the condensation of formaldehyde and glutathione to S-hydroxymethylglutathione.	NONE	NONE
1t9g_S_cavity_1	7	3.663	0.5233	3	0	2	1	1	0	Medium-chain specific acyl-CoA dehydrogenase, mitochondrial	OXIDOREDUCTASE, ELECTRON TRANSPORT	ACADM_HUMAN	This enzyme is specific for acyl chain lengths of 4 to 16.	Defects in ACADM are the cause of medium-chain acyl-CoA dehydrogenase deficiency (MCAD deficiency) [MIM:201450]. It is an autosomal recessive disease which causes fasting hypoglycemia, hepatic dysfunction, and encephalopathy, often resulting in death in infancy. The disease frequency is one in 13000.	NONE
1gk9_B_cavity_7	7	3.662	0.5231	4	1	1	0	1	0	Penicillin G acylase	NONE	P06875	NONE	NONE	NONE
1gqm_E_cavity_1	7	3.661	0.5231	6	0	1	0	0	0	Protein S100-A12	CALCIUM BINDING	S10AC_HUMAN	Calcitermin possesses antifungal activity against C.albicans and is also active against E.coli and P.aeruginosa but not L.monocytogenes and S.aureus.	NONE	NONE
2nr0_D_cavity_1	7	3.66	0.5229	4	2	0	1	0	0	tRNA pseudouridine synthase A	NONE	P07649	NONE	NONE	NONE
2bjh_B_cavity_2	7	3.657	0.5225	3	1	1	0	2	0	Feruloyl esterase A	NONE	O42807	NONE	NONE	NONE
1jqx_A_cavity_1	7	3.656	0.5223	5	2	0	0	0	0	Dihydroorotate dehydrogenase A	NONE	Q53ZE5	Nucleotide transport and metabolism	NONE	NONE
1jba_A_cavity_1	7	3.656	0.5222	6	0	1	0	0	0	Guanylyl cyclase-activating protein 2	NONE	P51177	NONE	NONE	NONE
1xk0_A_cavity_1	7	3.655	0.5221	5	0	1	0	1	0	Heme oxygenase 1	OXIDOREDUCTASE	HMOX1_HUMAN	Heme oxygenase cleaves the heme ring at the alpha methene bridge to form biliverdin. Biliverdin is subsequently converted to bilirubin by biliverdin reductase. Under physiological conditions, the activity of heme oxygenase is highest in the spleen, where	NONE	Sepsis;Cancer
1s9u_A_cavity_1	7	3.651	0.5215	3	1	1	1	1	0	Twin-arginine leader-binding protein dmsD	NONE	Q8ZPK0	NONE	NONE	NONE
1wgw_A_cavity_1	7	3.65	0.5214	6	1	0	0	0	0	Signal recognition particle 54 kDa protein	NONE	P14576	NONE	NONE	NONE
1o8v_A_cavity_1	7	3.647	0.5211	5	1	1	0	0	0	Fatty acid-binding protein homolog 1	NONE	Q02970	Involved in fatty acid binding	NONE	NONE
1z5l_C_cavity_1	9	4.689	0.521	5	1	1	0	2	0	T-cell surface glycoprotein CD1d1	NONE	P11609	Not known	NONE	NONE
1smq_C_cavity_1	7	3.647	0.521	4	1	1	1	0	0	Ribonucleoside-diphosphate reductase small chain 1	NONE	P09938	NONE	NONE	NONE
2kd2_A_cavity_1	7	3.646	0.5209	6	1	0	0	0	0	Fas apoptotic inhibitory molecule 1	NONE	Q9WUD8	NONE	NONE	NONE
1zz3_A_cavity_2	7	3.644	0.5205	3	1	1	0	2	0	Histone deacetylase-like amidohydrolase	NONE	Q70I53	NONE	NONE	NONE
1w63_E_cavity_3	7	3.644	0.5205	6	1	0	0	0	0	AP-1 complex subunit gamma-1	NONE	P22892	NONE	NONE	NONE
1amy_A_cavity_1	7	3.642	0.5203	4	0	2	1	0	0	Alpha-amylase type B isozyme	NONE	P04063	Carbohydrate transport and metabolism	NONE	NONE
1rip_A_cavity_1	7	3.639	0.5198	3	0	2	2	0	0	30S ribosomal protein S17	NONE	P23828	NONE	NONE	NONE
3bnb_A_cavity_2	7	3.63	0.5186	4	1	1	1	0	0	Seed lipoxygenase-1	NONE	P08170	NONE	NONE	NONE
1y64_B_cavity_2	8	4.148	0.5185	6	1	0	0	1	0	Actin, alpha skeletal muscle	NONE	P68135	NONE	NONE	NONE
1j9a_A_cavity_3	7	3.628	0.5183	5	1	1	0	0	0	Oligoribonuclease	NONE	P45340	NONE	NONE	NONE
1mj4_A_cavity_1	7	3.625	0.5179	6	1	0	0	0	0	Sulfite oxidase, mitochondrial	NONE	P51687	NONE	NONE	NONE
2cst_B_cavity_1	7	3.624	0.5177	5	1	0	1	0	0	Aspartate aminotransferase, cytoplasmic	NONE	P00504	Involved in transferase activity, transferring nitrogenous groups	NONE	NONE
3dnf_A_cavity_1	7	3.622	0.5175	4	2	0	0	1	0	4-hydroxy-3-methylbut-2-enyl diphosphate reductase	NONE	O67625	NONE	NONE	NONE
2i3q_A_cavity_1	7	3.621	0.5173	3	1	1	0	2	0	DNA endonuclease I-CreI	NONE	P05725	NONE	NONE	NONE
1hfe_M_cavity_4	7	3.618	0.5168	3	1	1	1	1	0	Periplasmic [Fe] hydrogenase large subunit	NONE	P07598	NONE	NONE	NONE
1v0f_A_cavity_8	7	3.618	0.5168	0	3	1	1	2	0	Endo-N-acetylneuraminidase	NONE	Q04830	Involved in endo-alpha-sialidase activity	NONE	NONE
1pkq_G_cavity_1	7	3.608	0.5154	5	0	1	0	1	0	Myelin-oligodendrocyte glycoprotein	NONE	Q63345	NONE	NONE	NONE
1n8w_A_cavity_3	7	3.606	0.5152	6	1	0	0	0	0	Malate synthase G	NONE	P0A5J4	Energy production and conversion	NONE	NONE
2dy3_C_cavity_1	9	4.634	0.5148	5	1	1	0	2	0	Alanine racemase	NONE	Q8RSU9	NONE	NONE	NONE
1nsl_B_cavity_1	7	3.601	0.5144	5	1	1	0	0	0	Putative ribosomal N-acetyltransferase ydaF	NONE	P96579	NONE	NONE	NONE
1a7b_A_cavity_2	7	3.598	0.5139	6	1	0	0	0	0	T-cell surface antigen CD2	NONE	P08921	NONE	NONE	NONE
1lnm_A_cavity_2	7	3.594	0.5135	5	0	1	0	1	0	Bilin-binding protein	LIGAND BINDING PROTEIN	BBP_PIEBR	This protein binds the blue pigments bilins.	NONE	NONE
2qxx_A_cavity_1	8	4.106	0.5132	6	2	0	0	0	0	Deoxycytidine triphosphate deaminase	NONE	O07247	NONE	NONE	NONE
1a8p_A_cavity_1	7	3.592	0.5132	6	1	0	0	0	0	Ferredoxin--NADP reductase	NONE	Q44532	Involved in oxidoreductase activity	NONE	NONE
1aw1_E_cavity_1	7	3.592	0.5132	3	1	1	1	1	0	Triosephosphate isomerase	NONE	P50921	Carbohydrate transport and metabolism	NONE	NONE
1prx_A_cavity_1	7	3.588	0.5126	6	1	0	0	0	0	Peroxiredoxin-6	NONE	P30041	NONE	NONE	NONE
2dfj_A_cavity_1	7	3.588	0.5125	1	4	0	1	1	0	Bis(5-nucleosyl)-tetraphosphatase, symmetrical	NONE	Q83SQ2	NONE	NONE	NONE
3fru_E_cavity_1	7	3.585	0.5121	5	0	2	0	0	0	IgG receptor FcRn large subunit p51	NONE	P13599	NONE	NONE	NONE
1wpx_B_cavity_1	7	3.585	0.5121	4	1	1	0	1	0	Carboxypeptidase Y	NONE	P00729	NONE	NONE	NONE
1faw_D_cavity_1	8	4.094	0.5118	6	0	0	0	2	0	Hemoglobin subunit alpha-A	NONE	P01989	NONE	NONE	NONE
3fbi_A_cavity_1	8	4.094	0.5117	4	0	2	2	0	0	Mediator of RNA polymerase II transcription subunit 7	NONE	Q08278	NONE	NONE	NONE
2w7n_B_cavity_1	7	3.58	0.5114	4	0	2	0	1	0	TrfB transcriptional repressor protein	NONE	P03052	NONE	NONE	NONE
1woj_A_cavity_1	7	3.573	0.5104	5	0	1	0	1	0	2,3-cyclic-nucleotide 3-phosphodiesterase	NONE	P09543	NONE	NONE	NONE
2e8o_A_cavity_1	8	4.081	0.5101	4	2	1	0	1	0	SAM domain and HD domain-containing protein 1	NONE	Q9Y3Z3	NONE	NONE	NONE
1cz2_A_cavity_1	7	3.57	0.51	6	0	1	0	0	0	Non-specific lipid-transfer protein	NONE	P24296	Involved in lipid binding	NONE	NONE
2ee4_A_cavity_1	8	4.078	0.5098	5	2	0	0	1	0	Rho GTPase-activating protein 5	NONE	Q13017	NONE	NONE	NONE
1mje_A_cavity_5	7	3.568	0.5097	5	1	1	0	0	0	26S proteasome complex subunit DSS1	NONE	P60896	NONE	NONE	NONE
1j3x_A_cavity_2	7	3.566	0.5094	3	2	0	0	2	0	High mobility group protein B2	NONE	P17741	NONE	NONE	NONE
1tvm_A_cavity_1	7	3.565	0.5093	7	0	0	0	0	0	Galactitol-specific phosphotransferase enzyme IIB component	NONE	P0A436	NONE	NONE	NONE
1otj_B_cavity_1	7	3.563	0.509	1	3	1	0	2	0	Alpha-ketoglutarate-dependent taurine dioxygenase	NONE	P37610	Secondary metabolites biosynthesis, transport and catabolism	NONE	NONE
1emy_A_cavity_1	10	5.081	0.5081	6	1	1	0	2	0	Myoglobin	NONE	P02186	NONE	NONE	NONE
2vof_C_cavity_1	7	3.556	0.508	6	0	1	0	0	0	Bcl-2-related protein A1	NONE	Q07440	NONE	NONE	NONE
1jtb_A_cavity_1	7	3.555	0.5079	6	0	1	0	0	0	Nonspecific lipid-transfer protein 1	NONE	P07597	Involved in lipid binding	NONE	NONE
2cxq_A_cavity_2	7	3.554	0.5077	4	1	1	1	0	0	Glucose-6-phosphate isomerase	NONE	P06745	Carbohydrate transport and metabolism	NONE	NONE
2goy_G_cavity_1	7	3.554	0.5077	5	2	0	0	0	0	Phosphoadenosine phosphosulfate reductase	NONE	O05927	NONE	NONE	NONE
1eo8_H_cavity_1	7	3.55	0.5072	6	1	0	0	0	0	Hemagglutinin	NONE	P03437	Involved in host cell surface receptor binding	NONE	NONE
3eay_A_cavity_1	7	3.549	0.507	3	1	1	0	2	0	Sentrin-specific protease 7	HYDROLASE	SENP7_HUMAN	Protease that deconjugates SUMO2 and SUMO3 from targeted proteins, but not SUMO1. Catalyzes the deconjugation of poly-SUMO2 and poly-SUMO3 chains. Has very low efficiency in processing full- length SUMO proteins to their mature forms.	NONE	NONE
2cxj_B_cavity_1	7	3.549	0.5069	6	0	1	0	0	0	Protein S100-A13	NONE	P97352	NONE	NONE	NONE
2qc3_A_cavity_1	9	4.556	0.5063	4	2	1	0	2	0	Malonyl CoA-acyl carrier protein transacylase	NONE	P63458	NONE	NONE	NONE
3a0h_B_cavity_5	7	3.542	0.506	3	2	1	1	0	0	Photosystem Q(B) protein	NONE	P51765	NONE	NONE	NONE
1wz8_D_cavity_3	7	3.542	0.506	5	1	1	0	0	0	Enoyl-CoA hydratase	NONE	Q5SLS5	Involved in catalytic activity	NONE	NONE
1rym_A_cavity_1	8	4.047	0.5059	6	1	0	0	1	0	Chloroplastic group IIB intron splicing facilitator CRS2, chloroplastic	NONE	Q9M5P4	NONE	NONE	NONE
1s6d_A_cavity_1	8	4.046	0.5057	5	0	2	0	1	0	Albumin-8	NONE	P23110	NONE	NONE	NONE
1gka_B_cavity_1	7	3.535	0.505	6	0	1	0	0	0	Crustacyanin-A1 subunit	NONE	P58989	Involved in binding	NONE	NONE
1q2h_C_cavity_1	8	4.039	0.5049	8	0	0	0	0	0	SH2B adapter protein 2	NONE	O14492	NONE	NONE	NONE
1jnd_A_cavity_1	12	6.057	0.5048	6	1	2	0	3	0	Chitinase-like protein Idgf2	NONE	Q9V3D4	Involved in nutrient reservoir activity	NONE	NONE
1ntg_D_cavity_1	7	3.533	0.5047	4	0	2	1	0	0	Tyrosyl-tRNA synthetase, cytoplasmic	NONE	P54577	Translation, ribosomal structure and biogenesis	NONE	Tyrosine is claimed to act as an effective antidepressant, however results are mixed. Tyrosine has also been claimed to reduce stress and combat narcolepsy and chronic fatigue, however these claims have been refuted by some studies.
2dlw_A_cavity_1	7	3.532	0.5046	2	0	3	2	0	0	Docking protein 2	NONE	O60496	NONE	NONE	NONE
2ron_A_cavity_2	7	3.528	0.504	4	1	1	0	1	0	Surfactin synthetase thioesterase subunit	NONE	Q08788	NONE	NONE	NONE
2z2n_A_cavity_2	7	3.522	0.5031	4	1	1	0	1	0	Virginiamycin B lyase	NONE	P17978	NONE	NONE	NONE
1vq0_A_cavity_1	8	4.021	0.5026	5	1	1	1	0	0	33 kDa chaperonin	NONE	Q9X1B4	Involved in unfolded protein binding	NONE	NONE
2aa7_A_cavity_1	7	3.518	0.5026	5	2	0	0	0	0	Mineralocorticoid receptor	TRANSCRIPTION	MCR_HUMAN	Receptor for both mineralocorticoids (MC) such as aldosterone and glucocorticoids (GC) such as corticosterone or cortisol. Binds to mineralocorticoid response elements (MRE) and transactivates target genes. The effect of MC is to increase ion and water tr	Defects in NR3C2 are a cause of autosomal dominant pseudohypoaldosteronism type I (PHA1) [MIM:177735]. PHA1 is characterized by urinary salt wasting, resulting from target organ unresponsiveness to mineralocorticoids. There are 2 forms of PHA1: the autosomal dominant form that is mild, and the recessive form which is more severe and due to defects in any of the epithelial sodium channel subunits.…	Metabolic disorder;Hypertension;Cardiovascular disease;Urinary tract disease
1p16_B_cavity_4	7	3.517	0.5025	3	1	1	2	0	0	mRNA-capping enzyme subunit alpha	NONE	P78587	NONE	NONE	NONE
1m3s_A_cavity_1	7	3.511	0.5016	4	1	1	0	1	0	3-hexulose-6-phosphate isomerase	NONE	P42404	NONE	NONE	NONE
1a4e_A_cavity_2	7	3.51	0.5014	6	1	0	0	0	0	Peroxisomal catalase A	NONE	P15202	Involved in catalase activity	NONE	NONE
2ql6_E_cavity_1	8	4	0.5	4	1	1	1	1	0	Nicotinamide riboside kinase 1	SIGNALING PROTEIN,TRANSFERASE	NRK1_HUMAN	Catalyzes the phosphorylation of nicotinamide riboside (NR) and nicotinic acid riboside (NaR) to form nicotinamide mononucleotide (NMN) and nicotinic acid mononucleotide (NaMN). The enzyme also phosphorylates the antitumor drugs tiazofurin and 3- deazagua	NONE	NONE
3gyr_C_cavity_4	8	3.999	0.4999	3	2	0	1	2	0	Phenoxazinone synthase	NONE	Q53692	NONE	NONE	NONE
3d3k_A_cavity_1	7	3.498	0.4997	4	2	1	0	0	0	Enhancer of mRNA-decapping protein 3	NONE	Q96F86	NONE	NONE	NONE
1d5y_D_cavity_4	7	3.495	0.4993	3	0	1	2	1	0	Right origin-binding protein	NONE	P0ACI0	NONE	NONE	NONE
3c10_C_cavity_1	8	3.99	0.4988	4	0	2	1	1	0	Histone deacetylase 7	HYDROLASE	HDAC7_HUMAN	Responsible for the deacetylation of lysine residues on the N-terminal part of the core histones (H2A, H2B, H3 and H4). Histone deacetylation gives a tag for epigenetic repression and plays an important role in transcriptional regulation, cell cycle progr	NONE	NONE
2lh5_A_cavity_1	8	3.983	0.4979	6	1	0	0	1	0	Leghemoglobin-2	NONE	P02240	Cell motility	NONE	NONE
3csy_M_cavity_1	8	3.977	0.4972	7	0	1	0	0	0	Pre-small/secreted glycoprotein	NONE	P60170	NONE	NONE	NONE
1s6i_A_cavity_3	8	3.961	0.4951	7	0	1	0	0	0	Calcium-dependent protein kinase SK5	NONE	P28583	NONE	NONE	NONE
3din_C_cavity_7	8	3.961	0.4951	5	1	1	0	1	0	Protein translocase subunit secA	NONE	Q9X1R4	NONE	NONE	NONE
1h3o_B_cavity_1	9	4.435	0.4928	9	0	0	0	0	0	Transcription initiation factor TFIID subunit 4	NONE	O00268	NONE	NONE	NONE
1vap_A_cavity_1	8	3.94	0.4925	4	0	2	2	0	0	Phospholipase A2	NONE	P51972	NONE	NONE	NONE
2iwg_E_cavity_1	10	4.921	0.4921	4	0	3	3	0	0	52 kDa Ro protein	IMMUNOGLOBULIN DOMAIN	RO52_HUMAN	Ribonucleoprotein particle composed of a single polypeptide and one of four small RNA molecules. It is present in all mammalian cells studied but has no known function. At least two isoforms are present in nucleated and red blood cells, and tissue specifi	Sera from patients with systemic lupus erythematosus (SLE) or primary Sjoegren syndrome often contain antibodies that react with normal cellular RO protein as if this antigen was foreign.	NONE
3bvo_B_cavity_1	9	4.424	0.4916	5	2	1	1	0	0	Co-chaperone protein HscB, mitochondrial	NONE	Q8IWL3	NONE	NONE	NONE
2rnq_A_cavity_1	8	3.926	0.4908	8	0	0	0	0	0	General transcription factor IIE subunit 1	NONE	P29083	NONE	NONE	NONE
2pph_A_cavity_1	9	4.408	0.4898	3	2	1	1	2	0	Mitogen-activated protein kinase kinase kinase 3	TRANSFERASE	M3K3_HUMAN	Component of a protein kinase signal transduction cascade. Mediates activation of the NF-kappa-B, AP1 and DDIT3 transcriptional regulators.	NONE	NONE
2d3a_I_cavity_1	10	4.888	0.4888	7	1	1	0	1	0	Glutamine synthetase root isozyme 3	NONE	P38561	NONE	NONE	NONE
2e74_A_cavity_1	8	3.905	0.4881	8	0	0	0	0	0	Cytochrome b6	NONE	P83791	Involved in oxidoreductase activity	NONE	NONE
1q90_B_cavity_1	8	3.903	0.4879	8	0	0	0	0	0	Apocytochrome f	NONE	P23577	Involved in iron ion binding	NONE	NONE
1m4u_A_cavity_1	9	4.388	0.4876	8	0	1	0	0	0	Bone morphogenetic protein 7	HORMONE/GROWTH FACTOR	BMP7_HUMAN	Induces cartilage and bone formation. May be the osteoinductive factor responsible for the phenomenon of epithelial osteogenesis. Plays a role in calcium regulation and bone homeostasis.	NONE	Tooth disease;Brain injury;Motor neurone disease;Cerebrovascular ischemia;Bone disease;Parkinsons disease;Renal failure;Periodontal disease
2a2f_X_cavity_3	8	3.899	0.4874	4	1	1	0	2	0	Exocyst complex component 6	NONE	Q9VDE6	NONE	NONE	NONE
3fsl_F_cavity_2	9	4.379	0.4865	6	2	0	1	0	0	Aromatic-amino-acid aminotransferase	NONE	P04693	NONE	NONE	NONE
1i9y_A_cavity_2	8	3.892	0.4865	1	2	2	2	1	0	Inositol-1,4,5-trisphosphate 5-phosphatase 1	NONE	O43001	Involved in inositol or phosphatidylinositol phosphatase activity	NONE	NONE
1dml_E_cavity_1	8	3.89	0.4862	5	0	2	0	1	0	DNA polymerase processivity factor	NONE	P10226	NONE	NONE	NONE
2czt_A_cavity_1	9	4.375	0.4861	7	0	1	0	1	0	Prostaglandin-H2 D-isomerase	NONE	O09114	NONE	NONE	NONE
