# Supplementary material for: Network Pharmacology-Based Prediction and Verification of the Targets and Mechanism for Panax Notoginseng Saponins against Coronary Heart Disease
Source: Evid Based Complement Alternat Med. 2019 Jul 3;2019:6503752. doi: 10.1155/2019/6503752 (PMC6636530; doi:10.1155/2019/6503752)
Supplement: Supplementary Materials — The supplementary materials contain 5 files which are the top 300 potential targets of each compound predicted from Pharmmapper Server. [file 6503752.f1.zip › 6503752.f1/Notoginsenoside R1.csv]

Ligand: MOL007487
Pharma Model	Num Feature	Fit	Norm Fit	Num Hydrophobic	Num HB Acceptor	Num HB Donor	Num Positive	Num Negative	Num Aromatic	Name	Class	Uniplot	Function	Disease	Idication
2ao9_I_cavity_2	4	4	1	4	0	0	0	0	0	NONE	NONE	NONE	NONE	NONE	NONE
3emj_G_cavity_1	4	4	1	4	0	0	0	0	0	Inorganic pyrophosphatase	NONE	Q9ZCW5	NONE	NONE	NONE
1onf_A_cavity_6	5	4.179	0.8357	4	1	0	0	0	0	Glutathione reductase	NONE	Q94655	Involved in oxidoreductase activity	NONE	NONE
1yqo_A_cavity_2	5	4.173	0.8346	4	0	1	0	0	0	Bifunctional P-450/NADPH-P450 reductase	NONE	P14779	Inorganic ion transport and metabolism	NONE	NONE
1dos_A_cavity_1	6	4.908	0.8179	4	1	0	1	0	0	Fructose-bisphosphate aldolase class 2	NONE	P0AB71	Carbohydrate transport and metabolism	NONE	NONE
2oay_A_cavity_3	6	4.904	0.8174	4	0	1	1	0	0	Plasma protease C1 inhibitor	IMMUNE SYSTEM,HYDROLASE INHIBITOR	IC1_HUMAN	Activation of the C1 complex is under control of the C1- inhibitor. It forms a proteolytically inactive stoichiometric complex with the C1r or C1s proteases. May play a potentially crucial role in regulating important physiological pathways including comp	Defects in SERPING1 are the cause of hereditary angioedema (HAE) [MIM:106100]; also called hereditary angioneurotic edema (HANE). HAE is an autosomal dominant disorder characterized by episodic local subcutaneous edema and submucosal edema involving the upper respiratory and gastrointestinal tracts. HAE due to C1 esterase inhibitor deficiency is comprised of two clinically indistinguishable forms…	NONE
2fbw_Q_cavity_1	5	4.081	0.8163	5	0	0	0	0	0	Succinate dehydrogenase [ubiquinone] flavoprotein subunit, mitochondrial	NONE	Q9YHT1	NONE	NONE	NONE
1jyv_D_cavity_7	5	4.074	0.8148	4	1	0	0	0	0	Beta-galactosidase	NONE	P00722	Carbohydrate transport and metabolism	NONE	For the symptomatic relief of patients with interstitial cystitis.
1wex_A_cavity_1	5	4.061	0.8121	4	1	0	0	0	0	Heterogeneous nuclear ribonucleoprotein L-like	NONE	Q921F4	NONE	NONE	NONE
1odh_A_cavity_1	5	4.006	0.8012	4	1	0	0	0	0	Chorion-specific transcription factor GCMa	NONE	P70348	NONE	NONE	NONE
1x65_A_cavity_1	6	4.794	0.799	4	1	0	0	1	0	Cold shock domain-containing protein E1	NONE	O75534	NONE	NONE	NONE
3d3l_B_cavity_3	5	3.991	0.7982	3	0	1	0	1	0	Arachidonate 12-lipoxygenase, 12S-type	NONE	P18054	NONE	NONE	NONE
2ep8_A_cavity_1	6	4.773	0.7956	1	3	1	1	0	0	Pescadillo homolog	NONE	O00541	NONE	NONE	NONE
1zte_C_cavity_1	5	3.97	0.794	5	0	0	0	0	0	Superoxide dismutase [Mn], mitochondrial	NONE	P04179	NONE	NONE	NONE
1u08_A_cavity_3	5	3.948	0.7897	3	0	1	1	0	0	Aminotransferase ybdL	NONE	P77806	NONE	NONE	NONE
2bty_A_cavity_1	5	3.947	0.7894	5	0	0	0	0	0	Acetylglutamate kinase	NONE	Q9X2A4	NONE	NONE	NONE
3boa_A_cavity_7	5	3.946	0.7893	3	0	1	1	0	0	Protein disulfide-isomerase	NONE	P17967	NONE	NONE	NONE
1win_A_cavity_1	5	3.924	0.7849	3	1	0	1	0	0	Flotillin-2	NONE	Q60634	NONE	NONE	NONE
1twu_A_cavity_1	6	4.575	0.7625	5	1	0	0	0	0	Uncharacterized protein yycE	NONE	P37479	NONE	NONE	NONE
1vrb_B_cavity_3	6	4.487	0.7479	3	2	0	0	1	0	Uncharacterized protein yxbC	NONE	P46327	NONE	NONE	NONE
1dus_A_cavity_2	6	4.476	0.746	3	2	0	0	1	0	Protein MJ0882	NONE	Q58292	NONE	NONE	NONE
2xat_A_cavity_2	6	4.417	0.7361	4	0	1	1	0	0	Chloramphenicol acetyltransferase	NONE	P26841	Involved in acyltransferase activity	NONE	Used in treatment of cholera, as it destroys the vibrios and decreases the diarrhea. It is effective against tetracycline-resistant vibrios. It is also used in eye drops or ointment to treat bacterial conjunctivitis.
1k44_E_cavity_1	6	4.401	0.7335	4	1	0	0	1	0	Nucleoside diphosphate kinase	NONE	P84284	NONE	NONE	NONE
1hj1_A_cavity_1	6	4.385	0.7309	4	1	0	1	0	0	Estrogen receptor beta	NONE	Q62986	Involved in transcription factor activity	NONE	NONE
2dy3_C_cavity_1	9	6.544	0.7271	5	1	1	0	2	0	Alanine racemase	NONE	Q8RSU9	NONE	NONE	NONE
1sgm_B_cavity_1	6	4.288	0.7146	4	1	0	1	0	0	Uncharacterized HTH-type transcriptional regulator yxaF	NONE	P42105	NONE	NONE	NONE
1s9c_F_cavity_3	6	4.287	0.7145	5	0	0	1	0	0	Peroxisomal multifunctional enzyme type 2	NONE	P51659	Lipid transport and metabolism	NONE	Some evidence suggests that NADH might be useful in treating Parkinsons disease, chronic fatigue syndrome, Alzheimers disease and cardiovascular disease.
3c7g_A_cavity_3	6	4.279	0.7131	4	1	0	1	0	0	Arabinoxylan arabinofuranohydrolase	NONE	Q45071	NONE	NONE	NONE
2ysw_C_cavity_1	8	5.674	0.7092	4	2	0	1	1	0	3-dehydroquinate dehydratase	NONE	O66440	NONE	NONE	NONE
1zag_D_cavity_1	6	4.246	0.7077	4	1	0	1	0	0	Zinc-alpha-2-glycoprotein	LIPID MOBILIZATION FACTOR	ZA2G_HUMAN	Stimulates lipid degradation in adipocytes and causes the extensive fat losses associated with some advanced cancers. May bind polyunsaturated fatty acids.	NONE	NONE
1qwo_A_cavity_3	6	4.245	0.7074	3	2	0	0	1	0	3-phytase A	NONE	O00092	NONE	NONE	NONE
1jv1_A_cavity_3	6	4.234	0.7057	3	1	1	1	0	0	UDP-N-acetylhexosamine pyrophosphorylase	NONE	Q16222	Involved in nucleotidyltransferase activity	NONE	NONE
1ahj_F_cavity_2	6	4.219	0.7031	6	0	0	0	0	0	Nitrile hydratase subunit alpha	NONE	P13448	NONE	NONE	NONE
2bz0_A_cavity_2	6	4.198	0.6997	3	2	0	0	1	0	GTP cyclohydrolase-2	NONE	P0A7I7	NONE	NONE	NONE
2fg5_A_cavity_1	6	4.197	0.6994	2	2	1	1	0	0	Ras-related protein Rab-31	SIGNALING PROTEIN	RAB31_HUMAN	NONE	NONE	NONE
1w98_B_cavity_1	6	4.189	0.6982	3	1	1	1	0	0	G1/S-specific cyclin-E1	TRANSFERASE	CCNE1_HUMAN	Essential for the control of the cell cycle at the G1/S (start) transition.	NONE	NONE
2qtv_A_cavity_6	7	4.876	0.6965	3	1	1	0	2	0	Protein transport protein SEC23	NONE	P15303	NONE	NONE	NONE
3bkb_A_cavity_3	6	4.168	0.6946	3	2	0	0	1	0	Proto-oncogene tyrosine-protein kinase Fes/Fps	TRANSFERASE	FES_HUMAN	NONE	NONE	NONE
1id3_A_cavity_1	6	4.166	0.6944	6	0	0	0	0	0	Histone H3	NONE	P61830	NONE	NONE	NONE
1l9x_C_cavity_3	6	4.166	0.6943	2	2	1	0	1	0	Gamma-glutamyl hydrolase	NONE	Q92820	Involved in gamma-gluatmyl hydrolase activity	NONE	Considered to be natures Brain food by improving mental capacities; helps speed the healing of ulcers; gives a lift from fatigue; helps control alcoholism, schizophrenia and the craving for sugar.
1ukf_A_cavity_1	6	4.164	0.6941	4	1	0	0	1	0	Cysteine protease avirulence protein avrPphB	NONE	Q52430	NONE	NONE	NONE
2hka_C_cavity_1	6	4.148	0.6913	6	0	0	0	0	0	Epididymal secretory protein E1	NONE	P79345	NONE	NONE	NONE
2vlg_C_cavity_1	6	4.145	0.6908	4	0	1	0	1	0	Sporulation kinase A	NONE	P16497	NONE	NONE	NONE
1gk9_B_cavity_7	7	4.826	0.6895	4	1	1	0	1	0	Penicillin G acylase	NONE	P06875	NONE	NONE	NONE
1h4r_B_cavity_2	6	4.129	0.6881	3	1	1	1	0	0	Merlin	NONE	P35240	NONE	NONE	NONE
2bc9_A_cavity_1	6	4.127	0.6879	3	1	1	1	0	0	Interferon-induced guanylate-binding protein 1	NONE	P32455	NONE	NONE	NONE
2d5v_A_cavity_1	6	4.125	0.6875	3	1	1	0	1	0	Hepatocyte nuclear factor 6	NONE	P70512	NONE	NONE	NONE
2gk9_A_cavity_2	6	4.124	0.6873	6	0	0	0	0	0	Phosphatidylinositol-5-phosphate 4-kinase type-2 gamma	NONE	Q8TBX8	NONE	NONE	NONE
2vdg_A_cavity_1	7	4.798	0.6854	4	2	0	0	1	0	Aldose reductase	NONE	P23901	NONE	NONE	NONE
2bj3_A_cavity_1	6	4.112	0.6853	6	0	0	0	0	0	Putative nickel-responsive regulator	NONE	O58316	Involved in DNA binding	NONE	NONE
2dme_A_cavity_1	6	4.109	0.6849	3	1	1	0	1	0	PHD finger protein 3	NONE	Q92576	NONE	NONE	NONE
2k2q_A_cavity_2	6	4.109	0.6848	5	1	0	0	0	0	Tyrocidine synthetase 3	NONE	O30409	NONE	NONE	NONE
1tg6_A_cavity_2	6	4.107	0.6846	4	1	0	0	1	0	Putative ATP-dependent Clp protease proteolytic subunit, mitochondrial	HYDROLASE	CLPP_HUMAN	Clp cleaves peptides in various proteins in a process that requires ATP hydrolysis. Clp may be responsible for a fairly general and central housekeeping function rather than for the degradation of specific substrates.	NONE	NONE
1ml8_A_cavity_1	6	4.103	0.6838	6	0	0	0	0	0	Protein yhfA	NONE	P0ADX3	NONE	NONE	NONE
1b4u_B_cavity_1	6	4.102	0.6837	4	0	1	0	1	0	Protocatechuate 4,5-dioxygenase alpha chain	NONE	P22635	NONE	NONE	NONE
1xvi_A_cavity_1	6	4.101	0.6835	5	0	1	0	0	0	Putative mannosyl-3-phosphoglycerate phosphatase	NONE	P76329	Involved in catalytic activity	NONE	NONE
1s40_A_cavity_2	6	4.099	0.6831	4	1	0	0	1	0	Cell division control protein 13	NONE	P32797	NONE	NONE	NONE
2apo_A_cavity_1	6	4.098	0.6829	4	1	0	0	1	0	Probable tRNA pseudouridine synthase B	NONE	Q57612	NONE	NONE	NONE
1b5l_A_cavity_1	6	4.096	0.6827	2	2	1	0	1	0	Interferon tau-1	NONE	P56828	NONE	NONE	NONE
1prx_A_cavity_1	7	4.751	0.6786	6	1	0	0	0	0	Peroxiredoxin-6	NONE	P30041	NONE	NONE	NONE
1hfe_M_cavity_4	7	4.733	0.6761	3	1	1	1	1	0	Periplasmic [Fe] hydrogenase large subunit	NONE	P07598	NONE	NONE	NONE
1tz7_A_cavity_3	6	4.047	0.6745	3	1	1	0	1	0	4-alpha-glucanotransferase	NONE	O66937	NONE	NONE	NONE
2f66_E_cavity_1	6	4.045	0.6742	6	0	0	0	0	0	Suppressor protein STP22 of temperature-sensitive alpha-factor receptor and arginine permease	NONE	P25604	NONE	NONE	NONE
1u63_C_cavity_2	7	4.715	0.6736	5	0	1	1	0	0	50S ribosomal protein L1P	NONE	P54050	Translation, ribosomal structure and biogenesis	NONE	NONE
1lpj_A_cavity_1	6	4.028	0.6713	3	0	2	1	0	0	Retinoid-binding protein 7	NONE	Q96R05	Involved in retinoid binding	NONE	For the treatment of vitamin A deficiency.
2okq_B_cavity_1	6	4.025	0.6709	4	0	1	1	0	0	Uncharacterized protein ybaA	NONE	P0AAQ9	NONE	NONE	NONE
1j7x_A_cavity_3	7	4.691	0.6702	4	1	1	1	0	0	Retinol-binding protein 3	NONE	Q7SZI7	NONE	NONE	NONE
3cf3_B_cavity_8	6	4.014	0.6691	1	1	3	1	0	0	Transitional endoplasmic reticulum ATPase	NONE	Q01853	Involved in nucleotide binding	NONE	NONE
1wru_A_cavity_3	6	4	0.6667	4	0	1	1	0	0	Baseplate protein	NONE	P08558	NONE	NONE	NONE
1wh0_A_cavity_1	6	4	0.6667	4	0	1	0	1	0	Ubiquitin carboxyl-terminal hydrolase 19	HYDROLASE	UBP19_HUMAN	Involved in the ubiquitin-dependent proteolytic pathway in conjunction with the 26S proteasome (By similarity).	NONE	NONE
1t9g_S_cavity_1	7	4.663	0.6661	3	0	2	1	1	0	Medium-chain specific acyl-CoA dehydrogenase, mitochondrial	OXIDOREDUCTASE, ELECTRON TRANSPORT	ACADM_HUMAN	This enzyme is specific for acyl chain lengths of 4 to 16.	Defects in ACADM are the cause of medium-chain acyl-CoA dehydrogenase deficiency (MCAD deficiency) [MIM:201450]. It is an autosomal recessive disease which causes fasting hypoglycemia, hepatic dysfunction, and encephalopathy, often resulting in death in infancy. The disease frequency is one in 13000.	NONE
1vcn_A_cavity_1	8	5.325	0.6656	4	1	1	1	1	0	CTP synthase	NONE	Q5SIA8	NONE	NONE	NONE
1in7_A_cavity_2	6	3.993	0.6656	2	3	0	0	1	0	Holliday junction ATP-dependent DNA helicase ruvB	NONE	Q56313	Involved in nucleotide binding	NONE	NONE
1wxr_A_cavity_2	8	5.323	0.6653	4	1	1	2	0	0	Hemoglobin-binding protease hbp	NONE	O88093	NONE	NONE	NONE
1ll0_A_cavity_1	7	4.65	0.6642	6	1	0	0	0	0	Glycogenin-1	NONE	P13280	Involved in transferase activity, transferring hexosyl groups	NONE	NONE
1c8v_A_cavity_3	6	3.98	0.6633	4	0	1	1	0	0	Tryptophan synthase alpha chain	NONE	P00929	NONE	NONE	NONE
2jul_A_cavity_2	6	3.975	0.6625	6	0	0	0	0	0	Calsenilin	NONE	Q9QXT8	NONE	NONE	NONE
2e74_A_cavity_3	7	4.636	0.6623	5	1	0	0	1	0	Cytochrome b6	NONE	P83791	Involved in oxidoreductase activity	NONE	NONE
3bdf_B_cavity_1	6	3.961	0.6602	2	1	1	0	2	0	Alkaline phosphatase	NONE	P00634	Inorganic ion transport and metabolism	NONE	NONE
1yiv_A_cavity_1	8	5.277	0.6596	4	2	0	2	0	0	Myelin P2 protein	NONE	P0C6G6	NONE	NONE	NONE
2in5_A_cavity_2	6	3.949	0.6582	2	0	2	0	2	0	Uncharacterized lipoprotein gfcB	NONE	P75884	NONE	NONE	NONE
2vde_C_cavity_1	6	3.932	0.6553	3	1	1	1	0	0	Outer membrane protein tolC	NONE	P02930	Cell wall/membrane/envelope biogenesis	NONE	NONE
3brp_A_cavity_2	7	4.584	0.6548	4	0	2	1	0	0	C-phycocyanin alpha chain	NONE	P00306	NONE	NONE	NONE
1t90_D_cavity_1	6	3.928	0.6547	3	1	0	0	2	0	Methylmalonate semialdehyde dehydrogenase [acylating]	NONE	P42412	NONE	NONE	NONE
2frx_A_cavity_2	6	3.926	0.6543	3	0	1	1	1	0	Ribosomal RNA small subunit methyltransferase F	NONE	P76273	NONE	NONE	NONE
1tdj_A_cavity_3	6	3.925	0.6542	4	0	1	1	0	0	Threonine dehydratase biosynthetic	NONE	P04968	Catalyzes the anaerobic formation of alpha-ketobutyrate and ammonia from threonine in a two-step reaction. The first step involved a dehydration of threonine and a production of enamine intermediates (aminocrotonate), which tautomerizes to its imine form (iminobutyrate). Both intermediates are unstable and short-lived. The second step is the nonenzymatic hydrolysis of the enamine/imine intermedia…	NONE	NONE
1z5l_C_cavity_1	9	5.863	0.6514	5	1	1	0	2	0	T-cell surface glycoprotein CD1d1	NONE	P11609	Not known	NONE	NONE
1wg5_A_cavity_1	7	4.525	0.6464	4	1	2	0	0	0	Heterogeneous nuclear ribonucleoprotein H2	NONE	P55795	NONE	NONE	NONE
2ron_A_cavity_2	7	4.518	0.6454	4	1	1	0	1	0	Surfactin synthetase thioesterase subunit	NONE	Q08788	NONE	NONE	NONE
2ee4_A_cavity_1	8	5.158	0.6448	5	2	0	0	1	0	Rho GTPase-activating protein 5	NONE	Q13017	NONE	NONE	NONE
1y64_B_cavity_2	8	5.15	0.6437	6	1	0	0	1	0	Actin, alpha skeletal muscle	NONE	P68135	NONE	NONE	NONE
1mky_A_cavity_4	7	4.501	0.643	6	0	1	0	0	0	GTP-binding protein engA	NONE	Q9X1F8	Posttranslational modification, protein turnover, chaperones	NONE	NONE
2da7_A_cavity_1	7	4.475	0.6393	3	1	1	0	2	0	Zinc finger E-box-binding homeobox 2	NONE	O60315	NONE	NONE	NONE
2veq_A_cavity_5	8	5.108	0.6385	4	1	1	0	2	0	Centromere DNA-binding protein complex CBF3 subunit B	NONE	P40969	NONE	NONE	NONE
1h9t_A_cavity_1	8	5.094	0.6367	7	1	0	0	0	0	Fatty acid metabolism regulator protein	NONE	P0A8V6	NONE	NONE	NONE
1wgw_A_cavity_1	7	4.438	0.6341	6	1	0	0	0	0	Signal recognition particle 54 kDa protein	NONE	P14576	NONE	NONE	NONE
2iwg_E_cavity_1	10	6.338	0.6338	4	0	3	3	0	0	52 kDa Ro protein	IMMUNOGLOBULIN DOMAIN	RO52_HUMAN	Ribonucleoprotein particle composed of a single polypeptide and one of four small RNA molecules. It is present in all mammalian cells studied but has no known function. At least two isoforms are present in nucleated and red blood cells, and tissue specifi	Sera from patients with systemic lupus erythematosus (SLE) or primary Sjoegren syndrome often contain antibodies that react with normal cellular RO protein as if this antigen was foreign.	NONE
2j47_A_cavity_1	7	4.436	0.6336	3	1	1	0	2	0	O-GlcNAcase BT_4395	NONE	Q89ZI2	NONE	NONE	NONE
1xdt_T_cavity_3	7	4.429	0.6328	5	0	1	1	0	0	Proheparin-binding EGF-like growth factor	COMPLEX (TOXIN/GROWTH FACTOR)	HBEGF_HUMAN	May be involved in macrophage-mediated cellular proliferation. It is mitogenic for fibroblasts and smooth muscle but not endothelial cells. It is able to bind EGF receptors with higher affinity than EGF itself and is a far more potent mitogen for smooth m	NONE	NONE
1sjw_A_cavity_1	8	5.042	0.6303	5	0	2	1	0	0	Nogalonic acid methyl ester cyclase	NONE	Q9RN59	NONE	NONE	NONE
1e6v_F_cavity_1	9	5.668	0.6297	4	2	1	0	2	0	Methyl-coenzyme M reductase I subunit alpha	NONE	Q49605	NONE	NONE	NONE
2qvv_A_cavity_1	7	4.408	0.6297	4	1	1	0	1	0	Fructose-1,6-bisphosphatase 1	NONE	P00636	Carbohydrate transport and metabolism	NONE	NONE
6req_D_cavity_1	7	4.398	0.6282	4	2	0	0	1	0	Methylmalonyl-CoA mutase large subunit	NONE	P11653	NONE	NONE	NONE
2poc_B_cavity_2	7	4.395	0.6279	3	1	1	0	2	0	Glucosamine--fructose-6-phosphate aminotransferase [isomerizing]	NONE	P53704	NONE	NONE	NONE
1gl9_B_cavity_6	7	4.394	0.6276	4	0	2	1	0	0	Reverse gyrase	NONE	O29238	Involved in nucleic acid binding	NONE	NONE
1s5a_A_cavity_1	7	4.386	0.6266	3	1	1	2	0	0	Hypothetical protein yesE	NONE	O31511	NONE	NONE	NONE
1r6u_A_cavity_4	7	4.381	0.6259	4	1	1	0	1	0	Tryptophanyl-tRNA synthetase, cytoplasmic	NONE	P23381	Translation, ribosomal structure and biogenesis	NONE	Tryptophan may be useful in increasing serotonin production, promoting healthy sleep, managing depression by enhancing mental and emotional well-being, managing pain tolerance, and managing weight.
1zdq_C_cavity_1	7	4.378	0.6255	4	1	1	1	0	0	Copper-containing nitrite reductase	NONE	P38501	Involved in copper ion binding	NONE	NONE
2csx_A_cavity_1	7	4.37	0.6243	4	0	2	1	0	0	Methionyl-tRNA synthetase	NONE	O67298	NONE	NONE	NONE
2vv5_F_cavity_2	7	4.365	0.6236	6	1	0	0	0	0	Small-conductance mechanosensitive channel	MEMBRANE PROTEIN	MSCS_ECOLI	Mechanosensitive channel that participates in the regulation of osmotic pressure changes within the cell, opening in response to stretch forces in the membrane lipid bilayer, without the need for other proteins. Forms an ion channel of 1.0 nanosiemens con;The channel pore is formed by TM3 and the loop between TM2 and TM3. After a sharp turn at Gly-113, an alpha-helix (residues 114-127) is oriente…	NONE	NONE
2a2f_X_cavity_3	8	4.986	0.6233	4	1	1	0	2	0	Exocyst complex component 6	NONE	Q9VDE6	NONE	NONE	NONE
1qib_A_cavity_1	8	4.982	0.6227	4	1	1	2	0	0	72 kDa type IV collagenase	HYDROLASE	MMP2_HUMAN	In addition to gelatin and collagens, it cleaves KiSS1 at a Gly-	-Leu bond.	Defects in MMP2 are the cause of multicentric osteolysis nodulosis and arthropathy (MONA) [MIM:605156]. Inherited osteolyses or vanishing bone syndromes are rare disorders of unknown etiology characterized by destruction and resorption of affected bones. MONA is an autosomal recessive osteolysis with multicentric involvement characterized by carpal and tarsal resorption, crippling arthritic chang…	NONE
2a98_A_cavity_2	8	4.98	0.6226	4	0	2	2	0	0	Inositol-trisphosphate 3-kinase C	NONE	Q96DU7	NONE	NONE	NONE
2yz2_A_cavity_1	8	4.975	0.6218	2	2	1	1	2	0	Putative ABC transporter ATP-binding protein TM_0222	NONE	Q9WY65	NONE	NONE	NONE
1vap_A_cavity_1	8	4.966	0.6207	4	0	2	2	0	0	Phospholipase A2	NONE	P51972	NONE	NONE	NONE
1xv9_D_cavity_1	7	4.344	0.6206	7	0	0	0	0	0	Nuclear receptor subfamily 1 group I member 3	DNA BINDING PROTEIN	NR1I3_HUMAN	Binds and transactivates the retinoic acid response elements that control expression of the retinoic acid receptor beta 2 and alcohol dehydrogenase 3 genes. Transactivates both the phenobarbital responsive element module of the human CYP2B6 gene and the C	NONE	NONE
1onq_C_cavity_1	7	4.342	0.6203	4	1	1	0	1	0	T-cell surface glycoprotein CD1a	IMMUNE SYSTEM	CD1A_HUMAN	Antigen-presenting protein that binds self and non-self lipid and glycolipid antigens and presents them to T-cell receptors on natural killer T-cells.	NONE	NONE
1sq1_A_cavity_3	7	4.335	0.6193	4	1	1	1	0	0	Chorismate synthase	NONE	Q9PM41	NONE	NONE	NONE
2cxq_A_cavity_2	7	4.332	0.6189	4	1	1	1	0	0	Glucose-6-phosphate isomerase	NONE	P06745	Carbohydrate transport and metabolism	NONE	NONE
2daf_A_cavity_2	7	4.327	0.6181	5	1	0	0	1	0	IQ and ubiquitin-like domain-containing protein	NONE	Q8NA54	NONE	NONE	NONE
3b68_A_cavity_1	7	4.312	0.616	5	0	1	0	1	0	Androgen receptor	TRANSCRIPTION	ANDR_HUMAN	Steroid hormone receptors are ligand-activated transcription factors that regulate eukaryotic gene expression and affect cellular proliferation and differentiation in target tissues. Transcription factor activity is modulated by bound coactivator and core	Genetic variation in AR can be responsible of androgenetic alopecia (AGA) [MIM:109200].;Defects in AR are the cause of androgen insensibility syndrome (AIS) [MIM:300068]; previously known as testicular feminization syndrome (TFM). It can be complete (CAIS) when external genitalia are phenotypically female; or partial (PAIS) when external genitalia are substantively ambiguous or mild (MAIS) when e…	Hypoactive sexual desire disorder;Hepatitis B virus infection;Cardiac failure;Andrology;Hirsutism;Female sexual dysfunction;Psoriasis;Reperfusion injury;Plasmodium infection;Atherosclerosis;Prostate hyperplasia;Fatigue;Male sexual dysfunction;Autoimmune disease;Testosterone deficiency;Uterine fibroids;Metabolic disorder;Myalgia;Obesity;Gynecological disorder;Contraception;Cancer;Hypercholesterole…
1rp8_A_cavity_1	8	4.927	0.6159	4	1	1	2	0	0	Alpha-amylase type A isozyme	NONE	P00693	Carbohydrate transport and metabolism	NONE	NONE
1zrt_C_cavity_4	7	4.309	0.6156	6	1	0	0	0	0	Ubiquinol-cytochrome c reductase iron-sulfur subunit	NONE	P08500	NONE	NONE	NONE
2yqi_A_cavity_1	7	4.305	0.6151	5	1	1	0	0	0	High mobility group protein B3	TRANSCRIPTION	HMGB3_HUMAN	Binds preferentially single-stranded DNA and unwinds double stranded DNA (By similarity).	NONE	NONE
1ntg_D_cavity_1	7	4.301	0.6144	4	0	2	1	0	0	Tyrosyl-tRNA synthetase, cytoplasmic	NONE	P54577	Translation, ribosomal structure and biogenesis	NONE	Tyrosine is claimed to act as an effective antidepressant, however results are mixed. Tyrosine has also been claimed to reduce stress and combat narcolepsy and chronic fatigue, however these claims have been refuted by some studies.
2acm_B_cavity_1	7	4.293	0.6133	6	1	0	0	0	0	Mucin-1	NONE	P15941	NONE	NONE	NONE
1inz_A_cavity_1	7	4.289	0.6127	4	1	1	1	0	0	Epsin-1	NONE	Q9Y6I3	NONE	NONE	NONE
1ith_B_cavity_1	8	4.882	0.6102	6	1	0	0	1	0	Hemoglobin F-I	NONE	P06148	NONE	NONE	NONE
1vmd_B_cavity_1	7	4.27	0.61	4	1	1	0	1	0	Methylglyoxal synthase	NONE	Q9X0R7	NONE	NONE	NONE
2k8y_A_cavity_1	7	4.261	0.6087	6	1	0	0	0	0	Uncharacterized protein MJ0187	NONE	Q57646	NONE	NONE	NONE
2qxx_A_cavity_1	8	4.853	0.6067	6	2	0	0	0	0	Deoxycytidine triphosphate deaminase	NONE	O07247	NONE	NONE	NONE
2qc3_A_cavity_1	9	5.455	0.6061	4	2	1	0	2	0	Malonyl CoA-acyl carrier protein transacylase	NONE	P63458	NONE	NONE	NONE
1ega_B_cavity_1	7	4.239	0.6056	4	1	1	0	1	0	GTP-binding protein era	NONE	P06616	NONE	NONE	NONE
3bxj_A_cavity_2	7	4.224	0.6034	4	2	0	1	0	0	Ras GTPase-activating protein SynGAP	NONE	Q9QUH6	NONE	NONE	NONE
2zv8_A_cavity_2	11	6.635	0.6032	5	2	1	3	0	0	Tyrosine-protein kinase Lyn	NONE	P25911	NONE	NONE	NONE
1nex_C_cavity_1	7	4.221	0.6031	5	1	1	0	0	0	Suppressor of kinetochore protein 1	NONE	P52286	NONE	NONE	NONE
1smq_C_cavity_1	7	4.21	0.6015	4	1	1	1	0	0	Ribonucleoside-diphosphate reductase small chain 1	NONE	P09938	NONE	NONE	NONE
2pgh_B_cavity_1	8	4.809	0.6011	6	0	1	0	1	0	Hemoglobin subunit alpha	NONE	P01965	NONE	NONE	NONE
2cyc_A_cavity_1	7	4.207	0.6011	5	0	1	1	0	0	Tyrosyl-tRNA synthetase	NONE	O58739	NONE	NONE	NONE
3fz7_F_cavity_2	7	4.207	0.601	5	0	1	1	0	0	Glutamate decarboxylase beta	NONE	P69910	NONE	NONE	NONE
2z2n_A_cavity_2	7	4.207	0.601	4	1	1	0	1	0	Virginiamycin B lyase	NONE	P17978	NONE	NONE	NONE
1emy_A_cavity_1	10	6	0.6	6	1	1	0	2	0	Myoglobin	NONE	P02186	NONE	NONE	NONE
2bsk_D_cavity_1	8	4.798	0.5997	5	0	1	0	2	0	Mitochondrial import inner membrane translocase subunit Tim9	NONE	Q9Y5J7	NONE	NONE	NONE
2o7c_A_cavity_1	7	4.194	0.5992	4	1	1	0	1	0	Methionine gamma-lyase	NONE	P13254	Involved in pyridoxal phosphate binding	NONE	NONE
2ql6_E_cavity_1	8	4.783	0.5978	4	1	1	1	1	0	Nicotinamide riboside kinase 1	SIGNALING PROTEIN,TRANSFERASE	NRK1_HUMAN	Catalyzes the phosphorylation of nicotinamide riboside (NR) and nicotinic acid riboside (NaR) to form nicotinamide mononucleotide (NMN) and nicotinic acid mononucleotide (NaMN). The enzyme also phosphorylates the antitumor drugs tiazofurin and 3- deazagua	NONE	NONE
1uvx_A_cavity_1	7	4.183	0.5975	5	1	0	0	1	0	Globin LI637	NONE	Q08753	Involved in oxygen binding	NONE	NONE
1wi3_A_cavity_2	7	4.181	0.5972	4	1	1	0	1	0	DNA-binding protein SATB2	DNA BINDING PROTEIN	SATB2_HUMAN	May play an important role in palate formation.	Chromosomal aberrations involving SATB2 are found in isolated cleft palate. Translocation t(2;7); translocation t(2;11).;Defects in SATB2 are the cause of isolated cleft palate with mental retardation [MIM:119540]. Patients manifest cleft palate, craniofacial dysmorphism and profound mental retardation.	NONE
2oyn_A_cavity_2	7	4.16	0.5943	4	1	1	1	0	0	Riboflavin kinase	NONE	Q60365	NONE	NONE	NONE
1tzp_A_cavity_1	7	4.151	0.593	2	2	1	1	1	0	Penicillin-insensitive murein endopeptidase precursor	NONE	P0C0T5	Cell wall/membrane/envelope biogenesis	NONE	NONE
3din_C_cavity_7	8	4.742	0.5928	5	1	1	0	1	0	Protein translocase subunit secA	NONE	Q9X1R4	NONE	NONE	NONE
1pju_A_cavity_1	9	5.334	0.5927	6	0	2	1	0	0	Wound-induced proteinase inhibitor 2	NONE	P05119	NONE	NONE	NONE
2bjh_B_cavity_2	7	4.144	0.592	3	1	1	0	2	0	Feruloyl esterase A	NONE	O42807	NONE	NONE	NONE
2v4j_C_cavity_1	7	4.143	0.5918	5	2	0	0	0	0	Sulfite reductase, dissimilatory-type subunit alpha	NONE	P45574	NONE	NONE	NONE
1x9f_I_cavity_1	9	5.324	0.5916	6	1	0	0	2	0	Extracellular globin-4	NONE	P13579	NONE	NONE	NONE
2o3a_B_cavity_2	7	4.134	0.5906	2	2	1	1	1	0	tRNA ribose 2-O-methyltransferase aTrm56	NONE	O29507	NONE	NONE	NONE
2o06_B_cavity_1	7	4.134	0.5906	1	1	2	3	0	0	Spermidine synthase	NONE	P19623	Amino acid transport and metabolism	NONE	S-Adenosylmethionine (SAMe) is used as a drug in Europe for the treatment of depression, liver disorders, fibromyalgia, and osteoarthritis. It has also been introduced into the United States market as a dietary supplement for the support of bone and joint health, as well as mood and emotional well being.
1wpx_B_cavity_1	7	4.125	0.5893	4	1	1	0	1	0	Carboxypeptidase Y	NONE	P00729	NONE	NONE	NONE
1rym_A_cavity_1	8	4.714	0.5892	6	1	0	0	1	0	Chloroplastic group IIB intron splicing facilitator CRS2, chloroplastic	NONE	Q9M5P4	NONE	NONE	NONE
1a0d_C_cavity_4	8	4.713	0.5892	3	1	2	2	0	0	Xylose isomerase	NONE	P54273	NONE	NONE	NONE
2csj_A_cavity_1	7	4.124	0.5892	4	1	1	1	0	0	Tight junction protein ZO-2	NONE	Q9Z0U1	NONE	NONE	NONE
1ysj_A_cavity_1	10	5.884	0.5884	5	1	2	1	1	0	Uncharacterized hydrolase yxeP	NONE	P54955	NONE	NONE	NONE
1v0f_A_cavity_8	7	4.118	0.5883	0	3	1	1	2	0	Endo-N-acetylneuraminidase	NONE	Q04830	Involved in endo-alpha-sialidase activity	NONE	NONE
1ch4_A_cavity_1	9	5.29	0.5877	7	0	1	0	1	0	Hemoglobin subunit beta	OXYGEN TRANSPORT	HBB_HUMAN	Involved in oxygen transport from the lung to the various peripheral tissues.;LVV-hemorphin-7 potentiates the activity of bradykinin, causing a decrease in blood pressure.	Defects in HBB may be a cause of Heinz body anemias [MIM:140700]. This is a form of non-spherocytic hemolytic anemia of Dacie type 1. After splenectomy, which has little benefit, basophilic inclusions called Heinz bodies are demonstrable in the erythrocytes. Before splenectomy, diffuse or punctate basophilia may be evident. Most of these cases are probably instances of hemoglobinopathy. The hemog…	NONE
3cb5_A_cavity_4	7	4.11	0.5872	2	3	0	2	0	0	FACT complex subunit spt16	NONE	O94267	NONE	NONE	NONE
2a8m_B_cavity_2	8	4.694	0.5867	4	2	1	0	1	0	Threonine aspartase 1	NONE	Q9H6P5	NONE	NONE	NONE
2ge9_A_cavity_2	7	4.106	0.5865	6	1	0	0	0	0	Tyrosine-protein kinase BTK	TRANSFERASE	BTK_HUMAN	Plays a crucial role in B-cell ontogeny. Transiently phosphorylates GTF2I on tyrosine residues in response to B-cell receptor cross-linking. Required for the formation of functional ARID3A DNA-binding complexes.	Defects in BTK are the cause of X-linked agammaglobulinemia type 1 (XLA) [MIM:300300]. XLA is a humoral immunodeficiency disease which results in developmental defects in the maturation pathway of B-cells. Affected boys have normal levels of pre-B-cells in their bone marrow but virtually no circulating mature B-lymphocytes. This results in a lack of immunoglobulins of all classes and leads to rec…	Autoimmune disease;Lymphoma
1a8p_A_cavity_1	7	4.102	0.5861	6	1	0	0	0	0	Ferredoxin--NADP reductase	NONE	Q44532	Involved in oxidoreductase activity	NONE	NONE
1xnr_J_cavity_1	7	4.102	0.586	6	1	0	0	0	0	30S ribosomal protein S2	NONE	P80371	NONE	NONE	NONE
1wz8_D_cavity_3	7	4.098	0.5854	5	1	1	0	0	0	Enoyl-CoA hydratase	NONE	Q5SLS5	Involved in catalytic activity	NONE	NONE
2c62_A_cavity_1	7	4.095	0.585	5	1	0	1	0	0	Activated RNA polymerase II transcriptional coactivator p15	NONE	P53999	NONE	NONE	NONE
2hzp_A_cavity_2	7	4.092	0.5846	4	0	2	0	1	0	Kynureninase	NONE	Q16719	NONE	NONE	NONE
1a57_A_cavity_1	9	5.257	0.5841	5	1	1	2	0	0	Fatty acid-binding protein, intestinal	NONE	P02693	Involved in transporter activity	NONE	NONE
1mg5_B_cavity_1	8	4.668	0.5835	5	1	1	1	0	0	Alcohol dehydrogenase	NONE	P00334	Involved in alcohol dehydrogenase activity	NONE	NONE
2vwt_A_cavity_1	9	5.251	0.5834	6	2	0	0	1	0	2-keto-3-deoxy-L-rhamnonate aldolase	NONE	P76469	NONE	NONE	NONE
3glb_C_cavity_2	7	4.083	0.5833	4	1	1	1	0	0	HTH-type transcriptional regulator catM	NONE	P07774	NONE	NONE	NONE
2r55_A_cavity_1	7	4.079	0.5828	4	1	1	1	0	0	StAR-related lipid transfer protein 5	NONE	Q9NSY2	NONE	NONE	NONE
1zfj_A_cavity_3	9	5.245	0.5827	4	0	3	2	0	0	Inosine-5-monophosphate dehydrogenase	NONE	P0C0H6	Nucleotide transport and metabolism	NONE	NONE
2i5p_O_cavity_1	8	4.661	0.5827	6	1	1	0	0	0	Glyceraldehyde-3-phosphate dehydrogenase 1	NONE	P84998	NONE	NONE	NONE
2lh5_A_cavity_1	8	4.654	0.5818	6	1	0	0	1	0	Leghemoglobin-2	NONE	P02240	Cell motility	NONE	NONE
2id4_B_cavity_3	9	5.232	0.5813	4	2	1	0	2	0	Kexin	NONE	P13134	NONE	NONE	NONE
1n60_B_cavity_2	7	4.068	0.5812	5	2	0	0	0	0	Carbon monoxide dehydrogenase small chain	NONE	P19921	NONE	NONE	NONE
3cu7_A_cavity_6	8	4.646	0.5807	5	0	2	1	0	0	Complement C5	NONE	P01031	Involved in endopeptidase inhibitor activity	NONE	For the treatment of patients with paroxysmal nocturnal hemoglobinuria (PNH) to reduce hemolysis.
1uf2_E_cavity_2	7	4.061	0.5802	4	1	1	1	0	0	Major 114 kDa structural protein	NONE	P22472	NONE	NONE	NONE
1bs2_A_cavity_3	7	4.058	0.5797	6	1	0	0	0	0	Arginyl-tRNA synthetase, cytoplasmic	NONE	Q05506	NONE	NONE	NONE
1uaa_B_cavity_3	7	4.047	0.5781	4	0	2	1	0	0	ATP-dependent DNA helicase rep	NONE	P09980	NONE	NONE	NONE
2iuk_B_cavity_1	7	4.047	0.5781	5	1	0	1	0	0	Seed lipoxygenase	NONE	P24095	NONE	NONE	NONE
1xj5_C_cavity_1	7	4.046	0.578	2	1	2	2	0	0	Spermidine synthase 1	NONE	Q9ZUB3	NONE	NONE	NONE
2j8w_A_cavity_1	9	5.198	0.5775	5	1	1	0	2	0	Cytochrome c	NONE	P00142	NONE	NONE	NONE
2vof_C_cavity_1	7	4.042	0.5774	6	0	1	0	0	0	Bcl-2-related protein A1	NONE	Q07440	NONE	NONE	NONE
1mba_A_cavity_1	7	4.039	0.577	6	0	0	0	1	0	Globin	NONE	P02210	Involved in iron ion binding	NONE	NONE
1m0t_A_cavity_1	7	4.034	0.5762	3	1	1	1	1	0	Glutathione synthetase	NONE	Q08220	Involved in glutathione synthesis activity	NONE	NONE
1eje_A_cavity_3	9	5.183	0.5759	4	2	1	0	2	0	Protein MTH_152	NONE	O26255	Involved in oxidoreductase activity	NONE	NONE
1dml_E_cavity_1	8	4.605	0.5756	5	0	2	0	1	0	DNA polymerase processivity factor	NONE	P10226	NONE	NONE	NONE
2afj_A_cavity_3	7	4.029	0.5756	4	1	1	1	0	0	SPRY domain-containing SOCS box protein 2	NONE	O88838	NONE	NONE	NONE
3h7f_B_cavity_2	8	4.601	0.5752	1	4	0	1	2	0	Serine hydroxymethyltransferase 1	NONE	O53441	NONE	NONE	NONE
1aq0_B_cavity_1	7	4.026	0.5751	6	0	0	1	0	0	Lichenase-2	NONE	P12257	Involved in hydrolase activity, hydrolyzing O-glycosyl compounds	NONE	NONE
2ii4_B_cavity_2	7	4.025	0.575	5	2	0	0	0	0	Lipoamide acyltransferase component of branched-chain alpha-keto acid dehydrogenase complex, mitochondrial	NONE	P11181	NONE	NONE	NONE
1h6n_A_cavity_5	12	6.897	0.5747	6	2	1	0	3	0	Catalase	NONE	P42321	Inorganic ion transport and metabolism	NONE	NONE
2zs0_C_cavity_1	8	4.594	0.5742	6	1	0	0	1	0	Extracellular giant hemoglobin major globin subunit A1	NONE	Q7M419	NONE	NONE	NONE
1vk0_F_cavity_1	7	4.019	0.5741	4	0	2	1	0	0	Uncharacterized protein At5g06450	NONE	Q9FNG3	NONE	NONE	NONE
1p1l_A_cavity_1	8	4.59	0.5737	4	1	2	1	0	0	Divalent-cation tolerance protein cutA	NONE	O28301	NONE	NONE	NONE
1lln_A_cavity_1	7	4.009	0.5727	4	1	1	1	0	0	Antiviral protein 2	NONE	Q40772	NONE	NONE	NONE
1vbg_A_cavity_8	7	4.006	0.5723	4	0	1	2	0	0	Pyruvate, phosphate dikinase 1, chloroplastic	NONE	P11155	Carbohydrate transport and metabolism	NONE	NONE
1q8b_A_cavity_1	7	4	0.5714	4	0	1	1	1	0	Uncharacterized protein yjcS	NONE	O31641	NONE	NONE	NONE
1so0_C_cavity_1	7	4	0.5714	3	0	2	1	1	0	Aldose 1-epimerase	NONE	Q96C23	NONE	NONE	NONE
2c2c_A_cavity_1	9	5.14	0.5711	6	1	1	0	1	0	Cytochrome c2	NONE	P0C189	NONE	NONE	NONE
1oi8_B_cavity_2	7	3.997	0.571	4	1	1	1	0	0	Protein ushA	NONE	P07024	Involved in hydrolase activity	NONE	NONE
3ed1_C_cavity_1	7	3.989	0.5699	3	0	2	2	0	0	Gibberellin receptor GID1	NONE	Q6L545	NONE	NONE	NONE
1xpk_C_cavity_1	7	3.989	0.5698	4	0	2	0	1	0	3-hydroxy-3-methylglutaryl CoA synthase	NONE	Q79ZY6	Involved in hydroxymethylglutaryl-CoA synthase activity	NONE	NONE
1y8o_A_cavity_2	10	5.697	0.5697	5	1	2	2	0	0	[Pyruvate dehydrogenase [lipoamide]] kinase isozyme 3, mitochondrial	TRANSFERASE	PDK3_HUMAN	Inhibits the mitochondrial pyruvate dehydrogenase complex by phosphorylation of the E1 alpha subunit, thus contributing to the regulation of glucose metabolism.	NONE	NONE
2yw2_A_cavity_3	7	3.988	0.5697	3	0	2	1	1	0	Phosphoribosylamine--glycine ligase	NONE	O66949	NONE	NONE	NONE
1l7b_A_cavity_1	7	3.986	0.5695	5	0	1	1	0	0	DNA ligase	NONE	P26996	NONE	NONE	NONE
1ix1_B_cavity_1	7	3.985	0.5693	3	1	1	1	1	0	Peptide deformylase	NONE	Q9I7A8	Translation, ribosomal structure and biogenesis	NONE	NONE
1gqm_E_cavity_1	7	3.982	0.5689	6	0	1	0	0	0	Protein S100-A12	CALCIUM BINDING	S10AC_HUMAN	Calcitermin possesses antifungal activity against C.albicans and is also active against E.coli and P.aeruginosa but not L.monocytogenes and S.aureus.	NONE	NONE
1z45_A_cavity_4	7	3.98	0.5686	3	0	2	2	0	0	GAL10 bifunctional protein [Includes: UDP-glucose 4-epimerase	NONE	P04397	Cell wall/membrane/envelope biogenesis	NONE	NONE
1xpo_B_cavity_3	7	3.978	0.5684	3	2	0	2	0	0	Transcription termination factor rho	NONE	P0AG30	Facilitates transcription termination by a mechanism that involves Rho binding to the nascent RNA, activation of Rho's RNA-dependent ATPase activity, and release of the mRNA from the DNA template. RNA-dependent NTPase which utilizes all four ribonucleoside triphosphates as substrates.	NONE	NONE
1bq6_A_cavity_2	7	3.975	0.5679	4	1	1	0	1	0	Chalcone synthase 2	NONE	P30074	Secondary metabolites biosynthesis, transport and catabolism	NONE	NONE
1fcg_A_cavity_1	8	4.54	0.5676	3	2	1	1	1	0	Low affinity immunoglobulin gamma Fc region receptor II-a	IMMUNE SYSTEM, MEMBRANE PROTEIN	FCG2A_HUMAN	Binds to the Fc region of immunoglobulins gamma. Low affinity receptor. By binding to IgG it initiates cellular responses against pathogens and soluble antigens.	NONE	NONE
2b9h_A_cavity_1	7	3.973	0.5676	3	1	1	2	0	0	Mitogen-activated protein kinase FUS3	NONE	P16892	NONE	NONE	NONE
1p16_B_cavity_4	7	3.972	0.5674	3	1	1	2	0	0	mRNA-capping enzyme subunit alpha	NONE	P78587	NONE	NONE	NONE
2jgd_A_cavity_8	7	3.972	0.5674	4	0	2	0	1	0	2-oxoglutarate dehydrogenase E1 component	NONE	P0AFG3	NONE	NONE	NONE
3c3e_D_cavity_4	7	3.971	0.5673	3	0	2	2	0	0	LPP	NONE	Q8PVT6	NONE	NONE	NONE
2nzt_B_cavity_6	7	3.966	0.5666	5	2	0	0	0	0	Hexokinase-2	TRANSFERASE	HXK2_HUMAN	NONE	NONE	NONE
2d86_A_cavity_1	7	3.966	0.5665	4	1	1	1	0	0	Guanine nucleotide exchange factor VAV3	NONE	Q9UKW4	NONE	NONE	NONE
1m3s_A_cavity_1	7	3.962	0.566	4	1	1	0	1	0	3-hexulose-6-phosphate isomerase	NONE	P42404	NONE	NONE	NONE
2r6z_B_cavity_1	11	6.223	0.5658	5	2	2	2	0	0	UPF0341 protein in rsp 3region	NONE	P72077	NONE	NONE	NONE
1bin_B_cavity_1	7	3.955	0.5649	6	0	0	0	1	0	Leghemoglobin A	NONE	P02238	Involved in iron ion binding	NONE	NONE
2eng_A_cavity_1	7	3.953	0.5647	3	1	2	1	0	0	Endoglucanase-5	NONE	P43316	Involved in cellulase activity	NONE	NONE
2i3q_A_cavity_1	7	3.951	0.5644	3	1	1	0	2	0	DNA endonuclease I-CreI	NONE	P05725	NONE	NONE	NONE
1un8_A_cavity_4	7	3.95	0.5644	3	0	2	2	0	0	Dihydroxyacetone kinase	NONE	P45510	Carbohydrate transport and metabolism	NONE	NONE
1pkq_G_cavity_1	7	3.949	0.5641	5	0	1	0	1	0	Myelin-oligodendrocyte glycoprotein	NONE	Q63345	NONE	NONE	NONE
2vtq_A_cavity_1	7	3.948	0.5641	6	1	0	0	0	0	Cell division protein kinase 2	NONE	P24941	Involved in protein kinase activity	NONE	NONE
1aw1_E_cavity_1	7	3.948	0.564	3	1	1	1	1	0	Triosephosphate isomerase	NONE	P50921	Carbohydrate transport and metabolism	NONE	NONE
1dw3_C_cavity_1	7	3.946	0.5637	5	1	1	0	0	0	Cytochrome c-type protein SHP	NONE	P81238	Involved in iron ion binding	NONE	NONE
2hzv_C_cavity_1	7	3.944	0.5634	5	2	0	0	0	0	Nickel-responsive regulator	NONE	P0A6Z6	NONE	NONE	NONE
3dnf_A_cavity_1	7	3.941	0.5631	4	2	0	0	1	0	4-hydroxy-3-methylbut-2-enyl diphosphate reductase	NONE	O67625	NONE	NONE	NONE
1xa8_B_cavity_1	9	5.064	0.5627	5	1	1	0	2	0	Glutathione-dependent formaldehyde-activating enzyme	NONE	Q51669	Catalyzes the condensation of formaldehyde and glutathione to S-hydroxymethylglutathione.	NONE	NONE
3c10_C_cavity_1	8	4.499	0.5624	4	0	2	1	1	0	Histone deacetylase 7	HYDROLASE	HDAC7_HUMAN	Responsible for the deacetylation of lysine residues on the N-terminal part of the core histones (H2A, H2B, H3 and H4). Histone deacetylation gives a tag for epigenetic repression and plays an important role in transcriptional regulation, cell cycle progr	NONE	NONE
1c0l_A_cavity_2	7	3.935	0.5622	6	1	0	0	0	0	D-amino-acid oxidase	NONE	P80324	Amino acid transport and metabolism	NONE	NONE
2ffa_A_cavity_1	7	3.935	0.5622	4	0	2	1	0	0	Alpha-hemolysin translocation ATP-binding protein hlyB	NONE	P08716	NONE	NONE	NONE
1ken_T_cavity_1	8	4.496	0.5619	4	0	3	1	0	0	Hemagglutinin	NONE	P03438	NONE	NONE	NONE
1ggl_B_cavity_1	8	4.494	0.5617	7	0	1	0	0	0	Retinol-binding protein 5	TRANSPORT PROTEIN	RET5_HUMAN	Intracellular transport of retinol.	NONE	NONE
1fpq_A_cavity_2	7	3.932	0.5617	6	1	0	0	0	0	Isoliquiritigenin 2-O-methyltransferase	NONE	P93324	Secondary metabolites biosynthesis, transport and catabolism	NONE	NONE
2bxg_A_cavity_8	8	4.492	0.5615	5	1	1	1	0	0	Serum albumin	TRANSPORT PROTEIN	ALBU_HUMAN	Serum albumin, the main protein of plasma, has a good binding capacity for water, Ca(2+), Na(+), K(+), fatty acids, hormones, bilirubin and drugs. Its main function is the regulation of the colloidal osmotic pressure of blood.	Defects in ALB are a cause of familial dysalbuminemic hyperthyroxinemia (FDH) [MIM:103600]. FDH is a form of euthyroid hyperthyroxinemia that is due to increased affinity of ALB for T(4). It is the most common cause of inherited euthyroid hyperthyroxinemia in Caucasian population.;A variant structure of albumin could lead to increased binding of zinc resulting in an asymptomatic augmentation of z…	NONE
2csh_A_cavity_2	7	3.929	0.5613	2	1	1	0	3	0	Zinc finger and BTB domain-containing protein 43	NONE	O43298	NONE	NONE	NONE
3dwl_D_cavity_1	7	3.925	0.5607	6	0	0	0	1	0	Actin-related protein 3	NONE	P32390	NONE	NONE	NONE
1f6t_B_cavity_1	8	4.484	0.5605	3	1	1	1	2	0	Nucleoside diphosphate kinase, cytosolic	NONE	P22887	Nucleotide transport and metabolism	NONE	NONE
2hi7_B_cavity_2	8	4.479	0.5599	7	0	1	0	0	0	Thio	NONE	P0AEG4	NONE	NONE	NONE
2uxw_A_cavity_1	15	8.377	0.5585	7	1	3	4	0	0	Very long-chain specific acyl-CoA dehydrogenase, mitochondrial	NONE	P49748	NONE	NONE	NONE
1mnt_A_cavity_1	8	4.46	0.5575	7	0	1	0	0	0	Regulatory protein mnt	NONE	P03049	NONE	NONE	NONE
1y4c_A_cavity_2	8	4.438	0.5547	4	1	1	2	0	0	Maltose-binding periplasmic protein	NONE	P0AEY0	Involved in the high-affinity maltose membrane transport system MalEFGK. Initial receptor for the active transport of and chemotaxis toward maltooligosaccharides (By similarity).	NONE	NONE
2bu7_A_cavity_3	9	4.985	0.5539	3	2	1	1	2	0	[Pyruvate dehydrogenase [lipoamide]] kinase isozyme 2, mitochondrial	TRANSFERASE	PDK2_HUMAN	Inhibits the mitochondrial pyruvate dehydrogenase complex by phosphorylation of the E1 alpha subunit, thus contributing to the regulation of glucose metabolism.	NONE	NONE
1ord_B_cavity_3	8	4.431	0.5539	6	1	0	0	1	0	Ornithine decarboxylase, inducible	NONE	P43099	Amino acid transport and metabolism	NONE	NONE
1kn9_B_cavity_1	8	4.43	0.5538	6	2	0	0	0	0	Signal peptidase I	NONE	P00803	Intracellular trafficking, secretion, and vesicular transport	NONE	NONE
1q90_B_cavity_1	8	4.424	0.553	8	0	0	0	0	0	Apocytochrome f	NONE	P23577	Involved in iron ion binding	NONE	NONE
2jbp_H_cavity_2	8	4.424	0.553	4	1	1	2	0	0	MAP kinase-activated protein kinase 2	NONE	P49137	Involved in protein kinase activity	NONE	NONE
1sxr_B_cavity_1	8	4.416	0.552	4	0	2	0	2	0	Peptidoglycan-recognition protein SA	NONE	Q9VYX7	Involved in N-acetylmuramoyl-L-alanine amidase activity	NONE	NONE
1hpl_A_cavity_1	9	4.957	0.5508	4	0	3	2	0	0	Pancreatic triacylglycerol lipase	NONE	P29183	NONE	NONE	NONE
2d9f_A_cavity_1	8	4.402	0.5503	4	1	2	1	0	0	FK506-binding protein 8	ISOMERASE	FKBP8_HUMAN	Constitutively inactive PPiase, which becomes active when bound to calmodulin and calcium. Seems to act as a chaperone for BCL2, targets it to the mitochondria and modulates its phosphorylation state. The BCL2/FKBP8/calmodulin/calcium complex probably int	NONE	NONE
2czt_A_cavity_1	9	4.95	0.55	7	0	1	0	1	0	Prostaglandin-H2 D-isomerase	NONE	O09114	NONE	NONE	NONE
1aip_D_cavity_1	8	4.394	0.5492	4	2	1	1	0	0	Elongation factor Tu-A	NONE	P60338	NONE	NONE	NONE
1g2x_A_cavity_1	9	4.94	0.5488	4	1	2	2	0	0	Phospholipase A2 KPA2	NONE	Q9DF52	Involved in phospholipase A2 activity	NONE	NONE
2f4n_C_cavity_1	9	4.932	0.548	3	1	2	3	0	0	Uncharacterized protein MJ1651	NONE	Q59045	NONE	NONE	NONE
3fbi_A_cavity_1	8	4.383	0.5479	4	0	2	2	0	0	Mediator of RNA polymerase II transcription subunit 7	NONE	Q08278	NONE	NONE	NONE
1gqg_A_cavity_2	8	4.374	0.5467	5	1	1	0	1	0	Quercetin 2,3-dioxygenase	NONE	Q7SIC2	Involved in quercetin 2,3-dioxygenase activity	NONE	NONE
1rqe_A_cavity_2	8	4.371	0.5463	5	0	2	0	1	0	Methylmalonyl-CoA carboxyltransferase 5S subunit	NONE	Q70AC7	Energy production and conversion	NONE	NONE
1jnd_A_cavity_1	12	6.544	0.5453	6	1	2	0	3	0	Chitinase-like protein Idgf2	NONE	Q9V3D4	Involved in nutrient reservoir activity	NONE	NONE
1su3_A_cavity_2	10	5.451	0.5451	4	0	4	2	0	0	Interstitial collagenase	NONE	P03956	NONE	NONE	NONE
3brk_X_cavity_4	8	4.355	0.5443	5	2	1	0	0	0	Glucose-1-phosphate adenylyltransferase	NONE	P39669	NONE	NONE	NONE
1u2x_B_cavity_1	9	4.888	0.5431	4	1	2	1	1	0	ADP-specific phosphofructokinase	NONE	O59355	NONE	NONE	NONE
1jh6_A_cavity_1	11	5.972	0.5429	5	1	2	0	3	0	Cyclic phosphodiesterase	NONE	O04147	Involved in cyclic-nucleotide phosphodiesterase activity	NONE	NONE
1v6a_A_cavity_2	8	4.344	0.5429	4	0	2	0	2	0	L-lactate dehydrogenase A chain	NONE	Q9W7K5	NONE	NONE	NONE
1kgl_A_cavity_1	8	4.343	0.5429	6	1	1	0	0	0	Retinol-binding protein 1	NONE	P02696	NONE	NONE	NONE
1f0n_A_cavity_1	9	4.873	0.5414	6	2	0	0	1	0	Antigen 85-B	NONE	P0C5B9	NONE	NONE	NONE
1ofu_B_cavity_1	8	4.326	0.5408	2	2	2	2	0	0	Cell division protein ftsZ	NONE	P47204	NONE	NONE	NONE
2d3a_I_cavity_1	10	5.396	0.5396	7	1	1	0	1	0	Glutamine synthetase root isozyme 3	NONE	P38561	NONE	NONE	NONE
1ifv_B_cavity_2	8	4.312	0.539	3	1	1	0	3	0	Protein LlR18B	NONE	P52779	NONE	NONE	NONE
2gkm_B_cavity_1	12	6.461	0.5384	7	2	1	0	2	0	Hemoglobin-like protein HbN	NONE	P0A592	Involved in oxygen binding	NONE	NONE
1t3k_A_cavity_2	8	4.306	0.5382	4	2	1	0	1	0	Dual specificity phosphatase Cdc25	NONE	Q8GY31	NONE	NONE	NONE
1chu_A_cavity_5	9	4.841	0.5379	3	1	1	4	0	0	L-aspartate oxidase	NONE	P10902	Involved in oxidoreductase activity	NONE	NONE
1eu1_A_cavity_7	9	4.84	0.5378	5	1	1	1	1	0	Dimethyl sulfoxide reductase	NONE	Q57366	Energy production and conversion	NONE	NONE
1tqy_G_cavity_1	9	4.838	0.5376	9	0	0	0	0	0	Actinorhodin polyketide putative beta-ketoacyl synthase 1	NONE	Q02059	NONE	NONE	NONE
2r6w_A_cavity_1	8	4.296	0.537	4	1	1	2	0	0	Estrogen receptor	TRANSCRIPTION	ESR1_HUMAN	Nuclear hormone receptor. The steroid hormones and their receptors are involved in the regulation of eukaryotic gene expression and affect cellular proliferation and differentiation in target tissues.	NONE	Melanoma;Brain tumor;Inflammation;Myocardial infarction;Fibrosis;Brain ischemia;Psoriasis;Rheumatoid arthritis;Retinitis pigmentosa;Atherosclerosis;Genitourinary disease;Breast disease;Atrophy;Crohns disease;Testosterone deficiency;Uterine fibroids;Fibrocystic breast disease;Arthralgia;Prostatitis;Prostate hyperplasia;Inflammatory bowel disease;Solid tumor;Gynecological disorder;Vascular disease;…
1h29_D_cavity_3	9	4.83	0.5366	7	1	0	0	1	0	High-molecular-weight cytochrome c	NONE	P24092	Involved in iron ion binding	NONE	NONE
2ahx_B_cavity_3	8	4.292	0.5365	3	1	2	2	0	0	Receptor tyrosine-protein kinase erbB-4	CELL CYCLE,SIGNALING PROTEIN	ERBB4_HUMAN	Specifically binds and is activated by neuregulins, NRG- 2, NRG-3, heparin-binding EGF-like growth factor, betacellulin and NTAK. Interaction with these factors induces cell differentiation. Not activated by EGF, TGF-A, and amphiregulin.	NONE	NONE
1moh_A_cavity_1	8	4.291	0.5364	6	0	1	0	1	0	Hemoglobin-1	NONE	P41260	Involved in iron ion binding	NONE	NONE
2qkd_A_cavity_5	8	4.288	0.536	3	2	2	1	0	0	Zinc finger protein ZPR1	NONE	Q62384	NONE	NONE	NONE
1ouu_B_cavity_1	8	4.283	0.5354	5	0	1	0	2	0	Hemoglobin subunit alpha-1	NONE	P02019	NONE	NONE	NONE
3g8a_E_cavity_1	8	4.276	0.5346	3	1	2	2	0	0	Ribosomal RNA small subunit methyltransferase G	NONE	Q9LCY2	NONE	NONE	NONE
3bvo_B_cavity_1	9	4.806	0.534	5	2	1	1	0	0	Co-chaperone protein HscB, mitochondrial	NONE	Q8IWL3	NONE	NONE	NONE
1a67_A_cavity_1	8	4.27	0.5338	7	0	1	0	0	0	Cystatin	NONE	P01038	NONE	NONE	NONE
2cpf_A_cavity_1	8	4.27	0.5337	6	1	1	0	0	0	Probable RNA-binding protein 19	NONE	Q8R3C6	NONE	NONE	NONE
1u2e_D_cavity_1	8	4.267	0.5333	5	1	1	0	1	0	2-hydroxy-6-oxononadienedioate/2-hydroxy-6-oxononatrienedioate hydrolase	NONE	P77044	NONE	NONE	NONE
1b5q_C_cavity_1	9	4.795	0.5328	6	1	2	0	0	0	Polyamine oxidase	NONE	O64411	Amino acid transport and metabolism	NONE	NONE
1xp3_A_cavity_1	9	4.794	0.5327	3	1	2	2	1	0	Probable endonuclease 4	NONE	Q81LV1	NONE	NONE	NONE
1bqb_A_cavity_1	8	4.26	0.5325	4	0	2	1	1	0	Zinc metalloproteinase aureolysin	NONE	P81177	NONE	NONE	NONE
1tno_J_cavity_1	10	5.321	0.5321	8	1	0	0	1	0	Protein farnesyltransferase/geranylgeranyltransferase type-1 subunit alpha	NONE	Q04631	NONE	NONE	NONE
1i1m_A_cavity_2	9	4.789	0.5321	6	0	2	0	1	0	Branched-chain-amino-acid aminotransferase	NONE	P0AB80	Amino acid transport and metabolism	NONE	NONE
1v9x_A_cavity_1	13	6.916	0.532	5	1	3	0	4	0	Poly [ADP-ribose] polymerase 1	NONE	Q9ZP54	NONE	NONE	NONE
